# Supplementary material for: Synthesis and Biological Evaluation of Novel Jatrorrhizine Derivatives with Amino Groups Linked at the 3-Position as Inhibitors of Acetylcholinesterase
Source: Hindawi journal article supplement (doi:10.1155/2017/3261520), 2017-01-01
Supplement: f1 [file 3261520.f1.zip]

Archive with 29 entries (21 files):
- 3261520.f1/
- 3261520.f1/A spectrogram of compound 3a/
- 3261520.f1/A spectrogram of compound 3a/13CNMR of compound 3a.jpg
- 3261520.f1/A spectrogram of compound 3a/1HNMR  of compound 3a.jpg
- 3261520.f1/A spectrogram of compound 3a/mass spectrogram of compound 3a.jpg
- 3261520.f1/A spectrogram of compound 3b/
- 3261520.f1/A spectrogram of compound 3b/13CNMR of compound 3b.jpg
- 3261520.f1/A spectrogram of compound 3b/1HNMR  of compound 3b.jpg
- 3261520.f1/A spectrogram of compound 3b/mass spectrogram of compound 3b.jpg
- 3261520.f1/A spectrogram of compound 3c/
- 3261520.f1/A spectrogram of compound 3c/13CNMR of compound 3c.jpg
- 3261520.f1/A spectrogram of compound 3c/1HNMR of compound 3c.jpg
- 3261520.f1/A spectrogram of compound 3c/mass spectrogram of compound 3c.jpg
- 3261520.f1/A spectrogram of compound 3d/
- 3261520.f1/A spectrogram of compound 3d/13CNMR of compound 3d.jpg
- 3261520.f1/A spectrogram of compound 3d/1HNMR of compound 3d.jpg
- 3261520.f1/A spectrogram of compound 3d/mass spectrogram of compound 3d.jpg
- 3261520.f1/A spectrogram of compound 3e/
- 3261520.f1/A spectrogram of compound 3e/13CNMR of compound 3e.jpg
- 3261520.f1/A spectrogram of compound 3e/1HNMR of compound 3e.jpg
- 3261520.f1/A spectrogram of compound 3e/mass spectrogram of compound 3e.jpg
- 3261520.f1/A spectrogram of compound 3f/
- 3261520.f1/A spectrogram of compound 3f/13CNMR of compound 3f.jpg
- 3261520.f1/A spectrogram of compound 3f/1HNMR of compound 3f.jpg
- 3261520.f1/A spectrogram of compound 3f/mass spectrogram of compound 3f.jpg
- 3261520.f1/A spectrogram of compound 3g/
- 3261520.f1/A spectrogram of compound 3g/13CNMR of compound 3g.jpg
- 3261520.f1/A spectrogram of compound 3g/1HNMR of compound 3g.jpg
- 3261520.f1/A spectrogram of compound 3g/mass spectrogram of compound 3g.jpg
