# Supplementary figures and images for: Synthesis and Biological Evaluation of Novel Jatrorrhizine Derivatives with Amino Groups Linked at the 3-Position as Inhibitors of Acetylcholinesterase
Source: Hindawi journal article supplement (doi:10.1155/2017/3261520), 2017-01-01

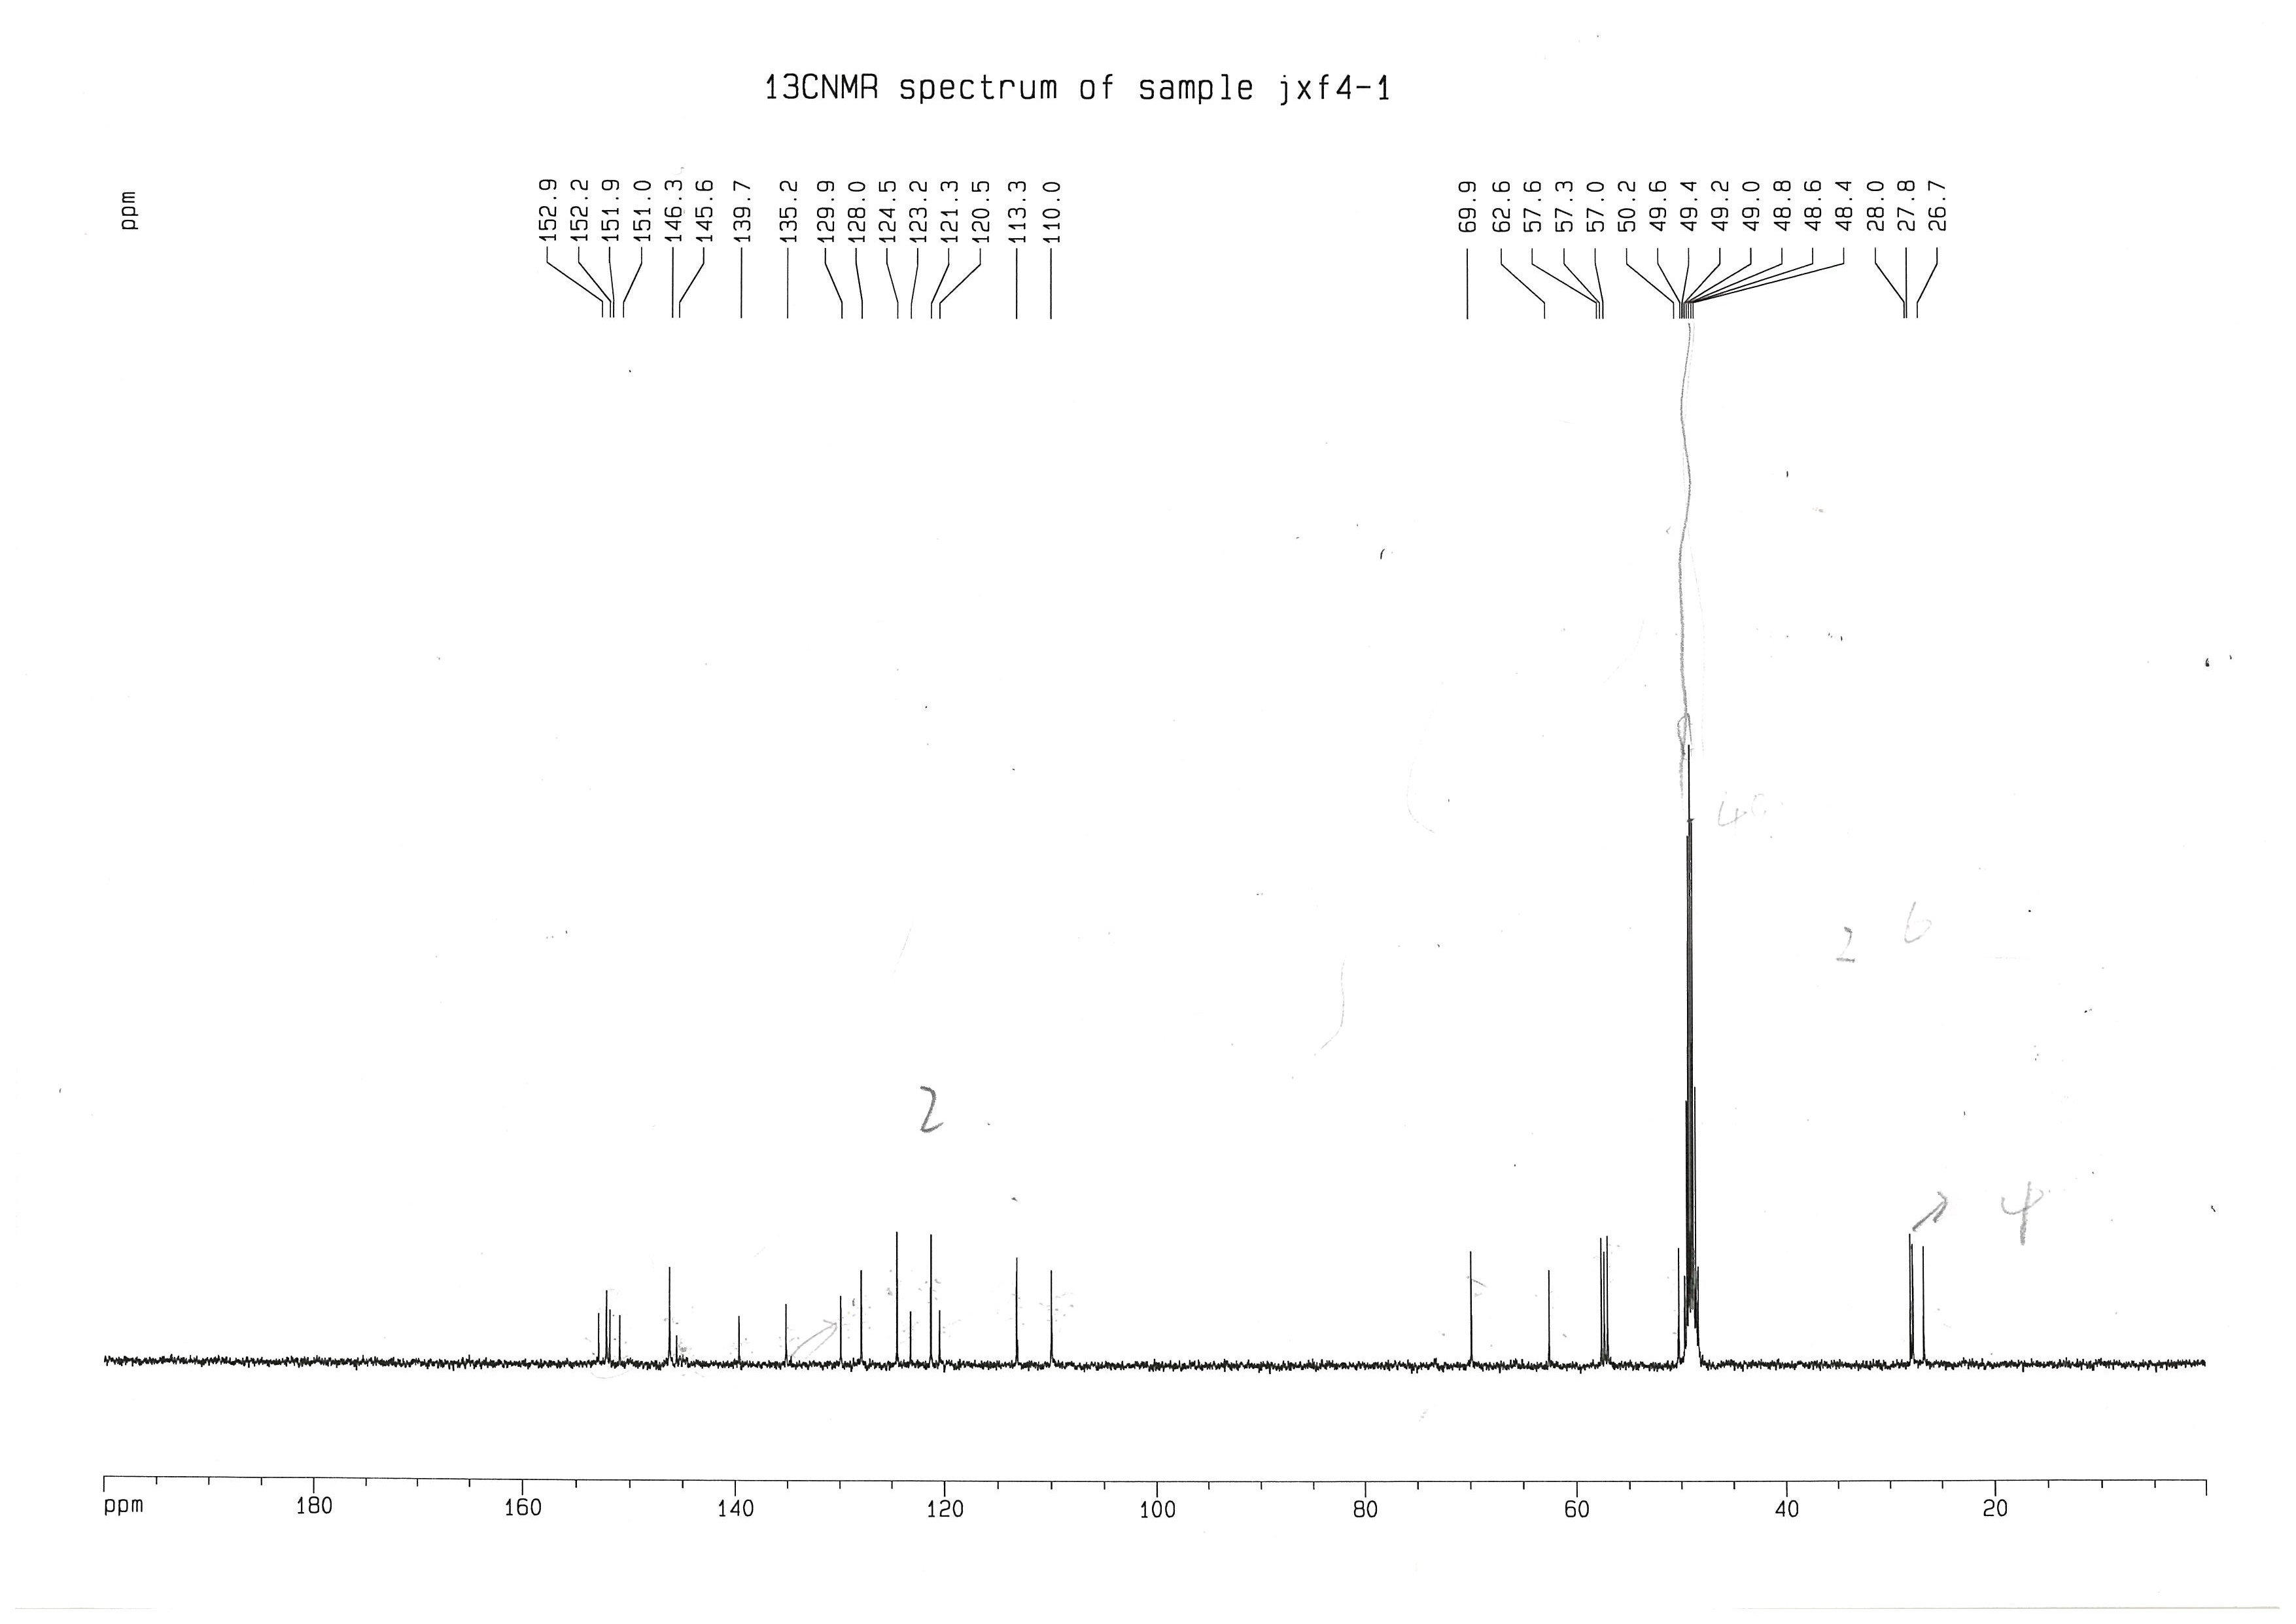

Supplement: f1 [file 3261520.f1.zip › 3261520.f1/A spectrogram of compound 3a/13CNMR of compound 3a.jpg]

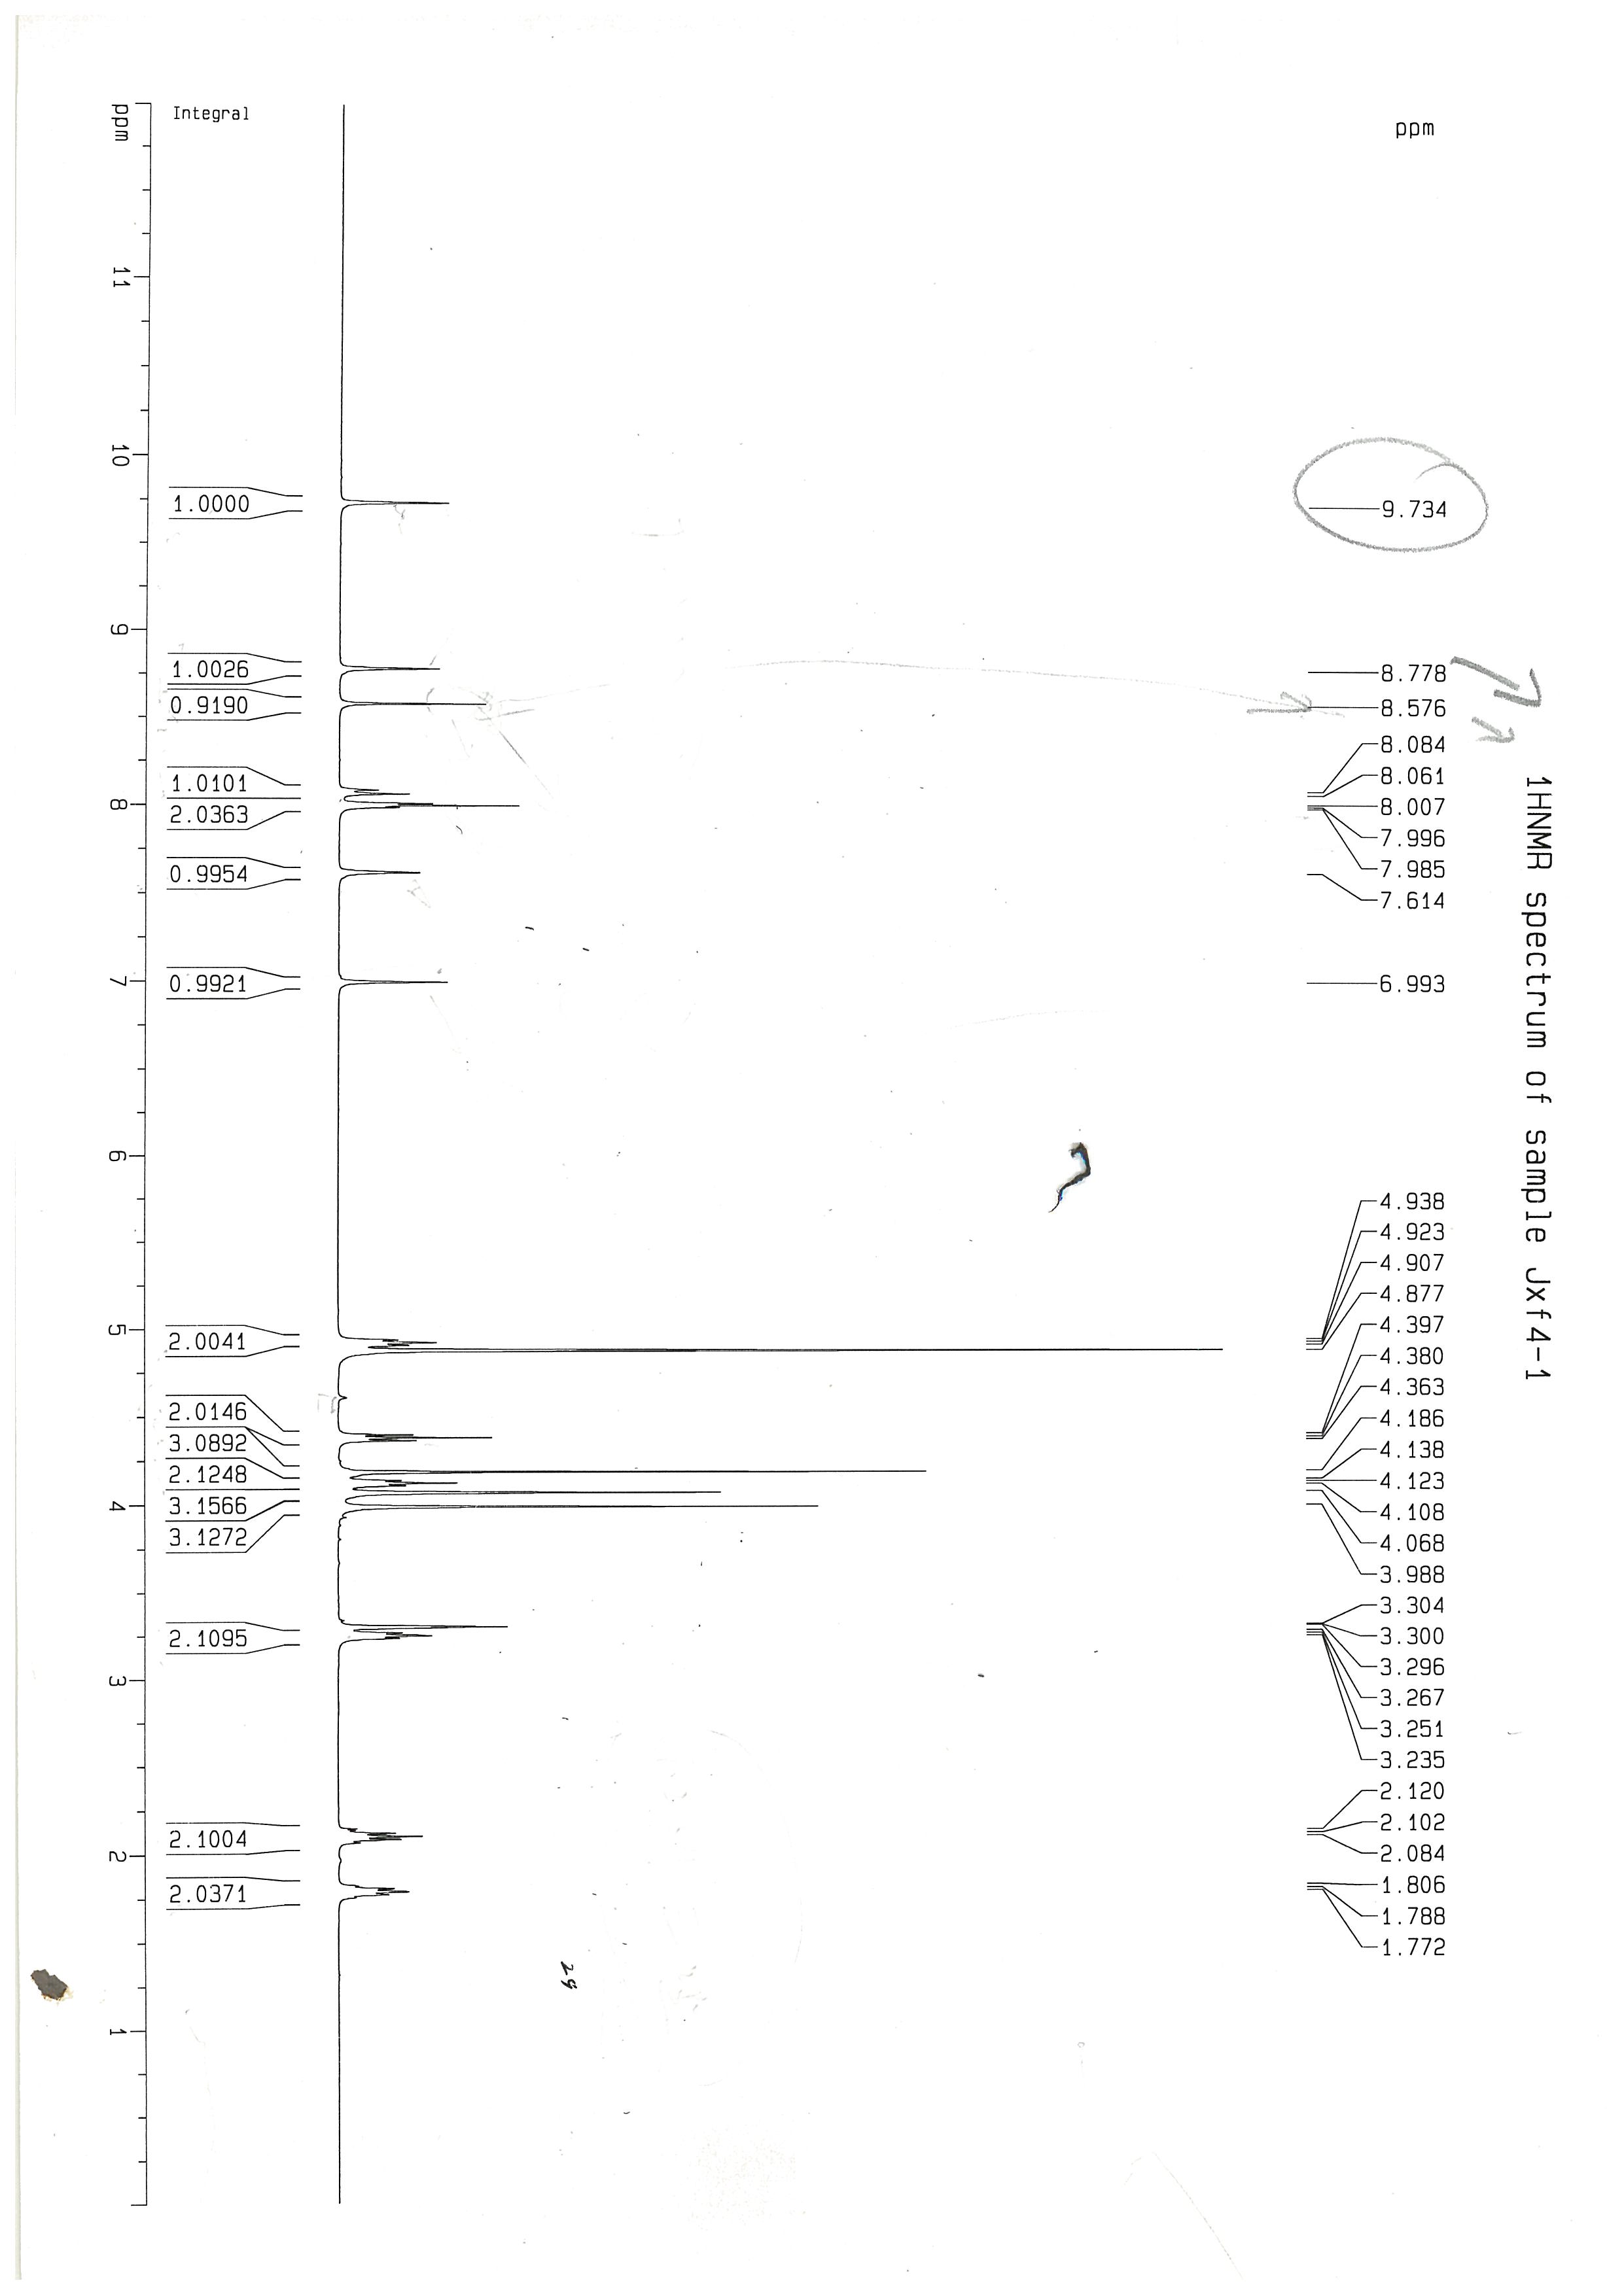

Supplement: f1 [file 3261520.f1.zip › 3261520.f1/A spectrogram of compound 3a/1HNMR of compound 3a.jpg]

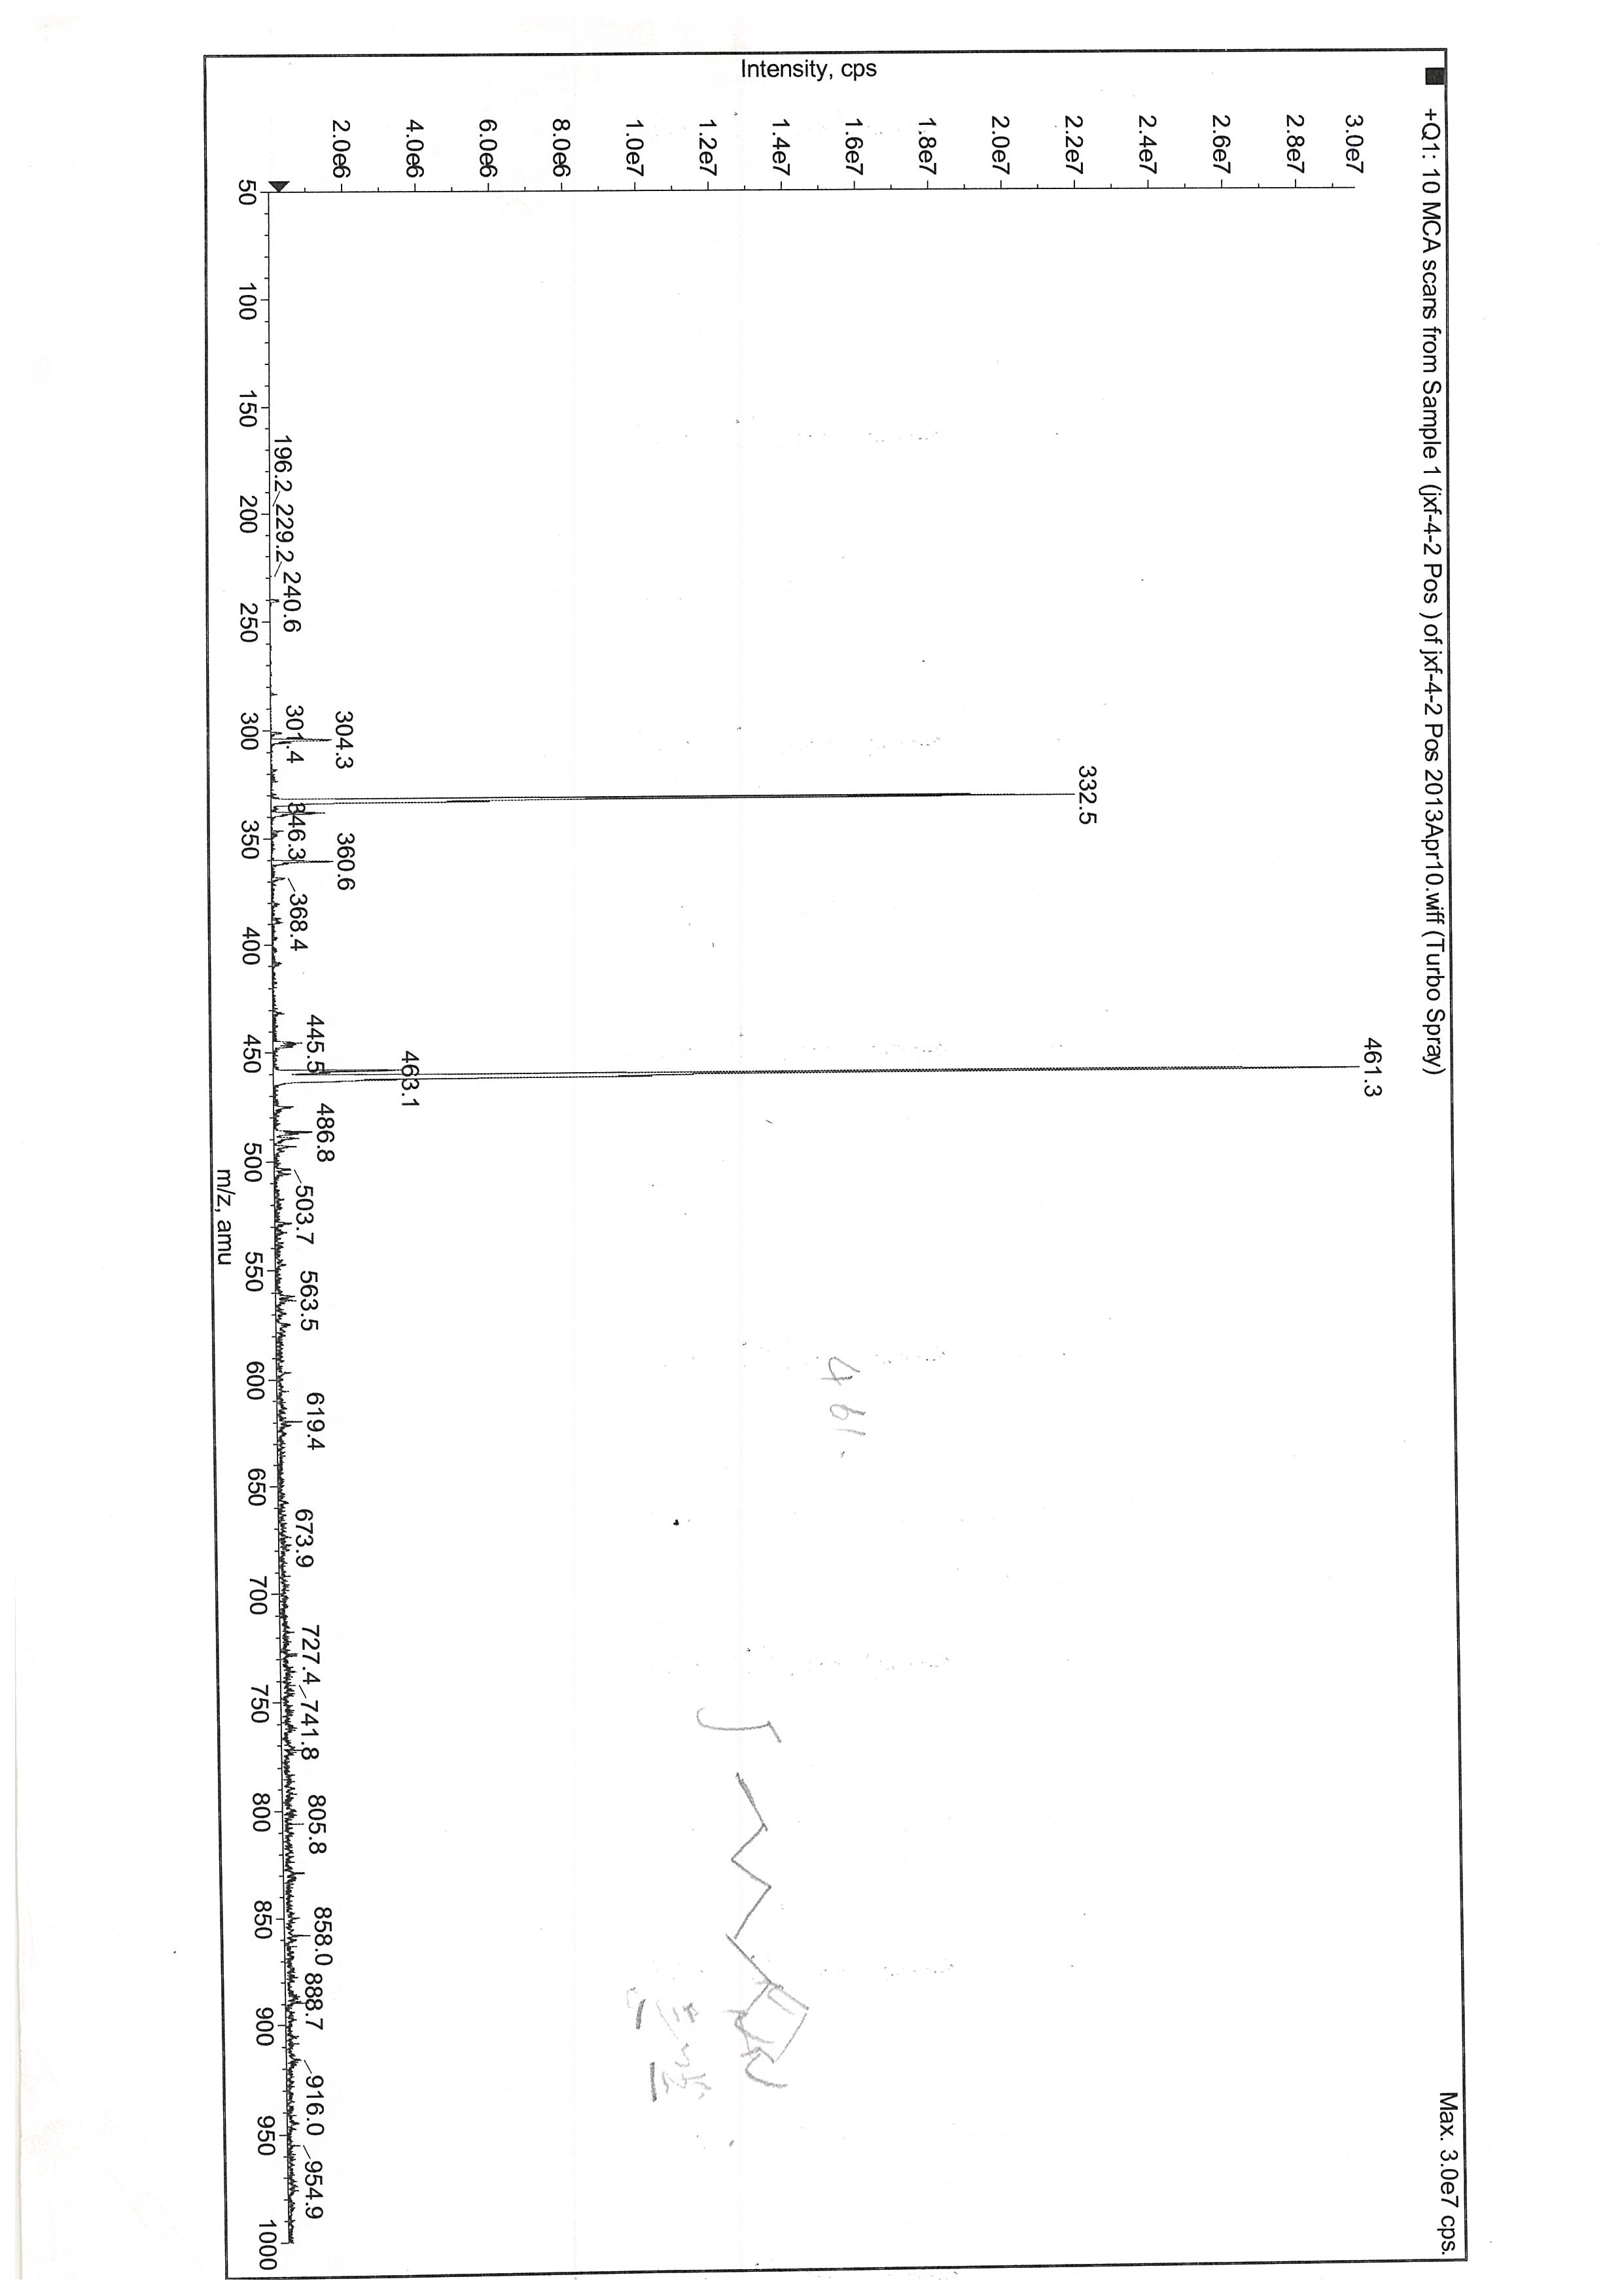

Supplement: f1 [file 3261520.f1.zip › 3261520.f1/A spectrogram of compound 3a/mass spectrogram of compound 3a.jpg]

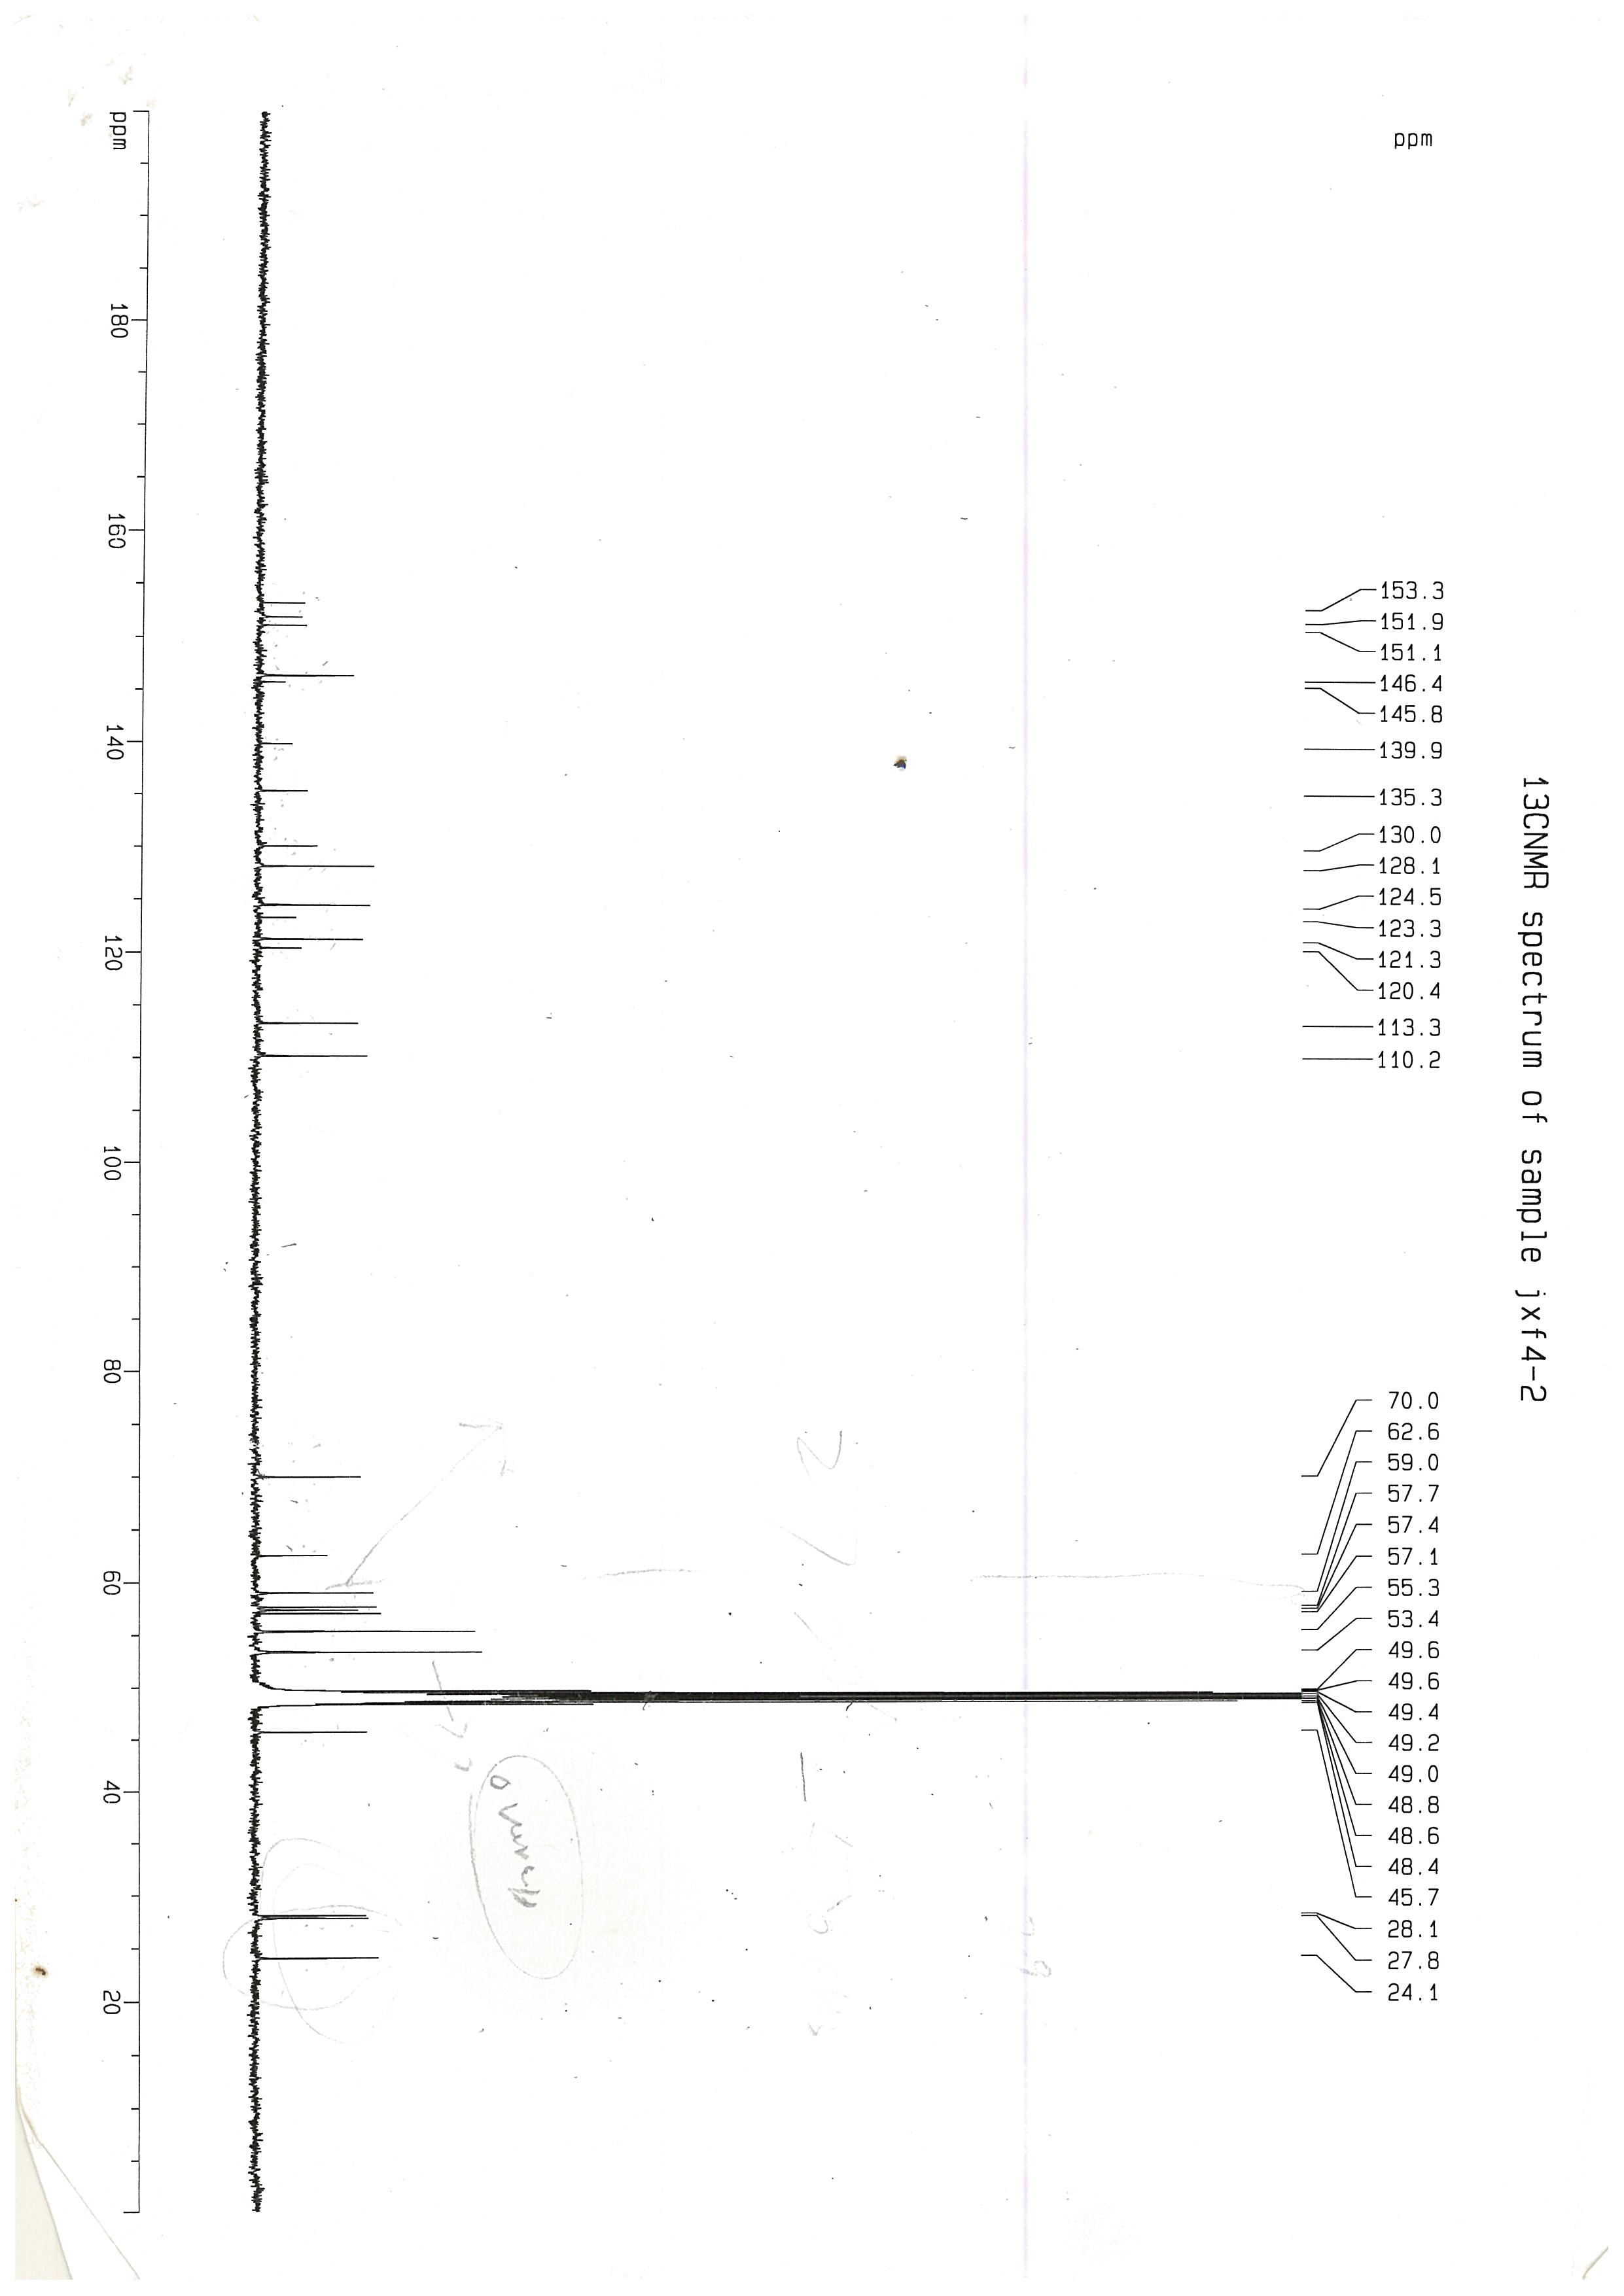

Supplement: f1 [file 3261520.f1.zip › 3261520.f1/A spectrogram of compound 3b/13CNMR of compound 3b.jpg]

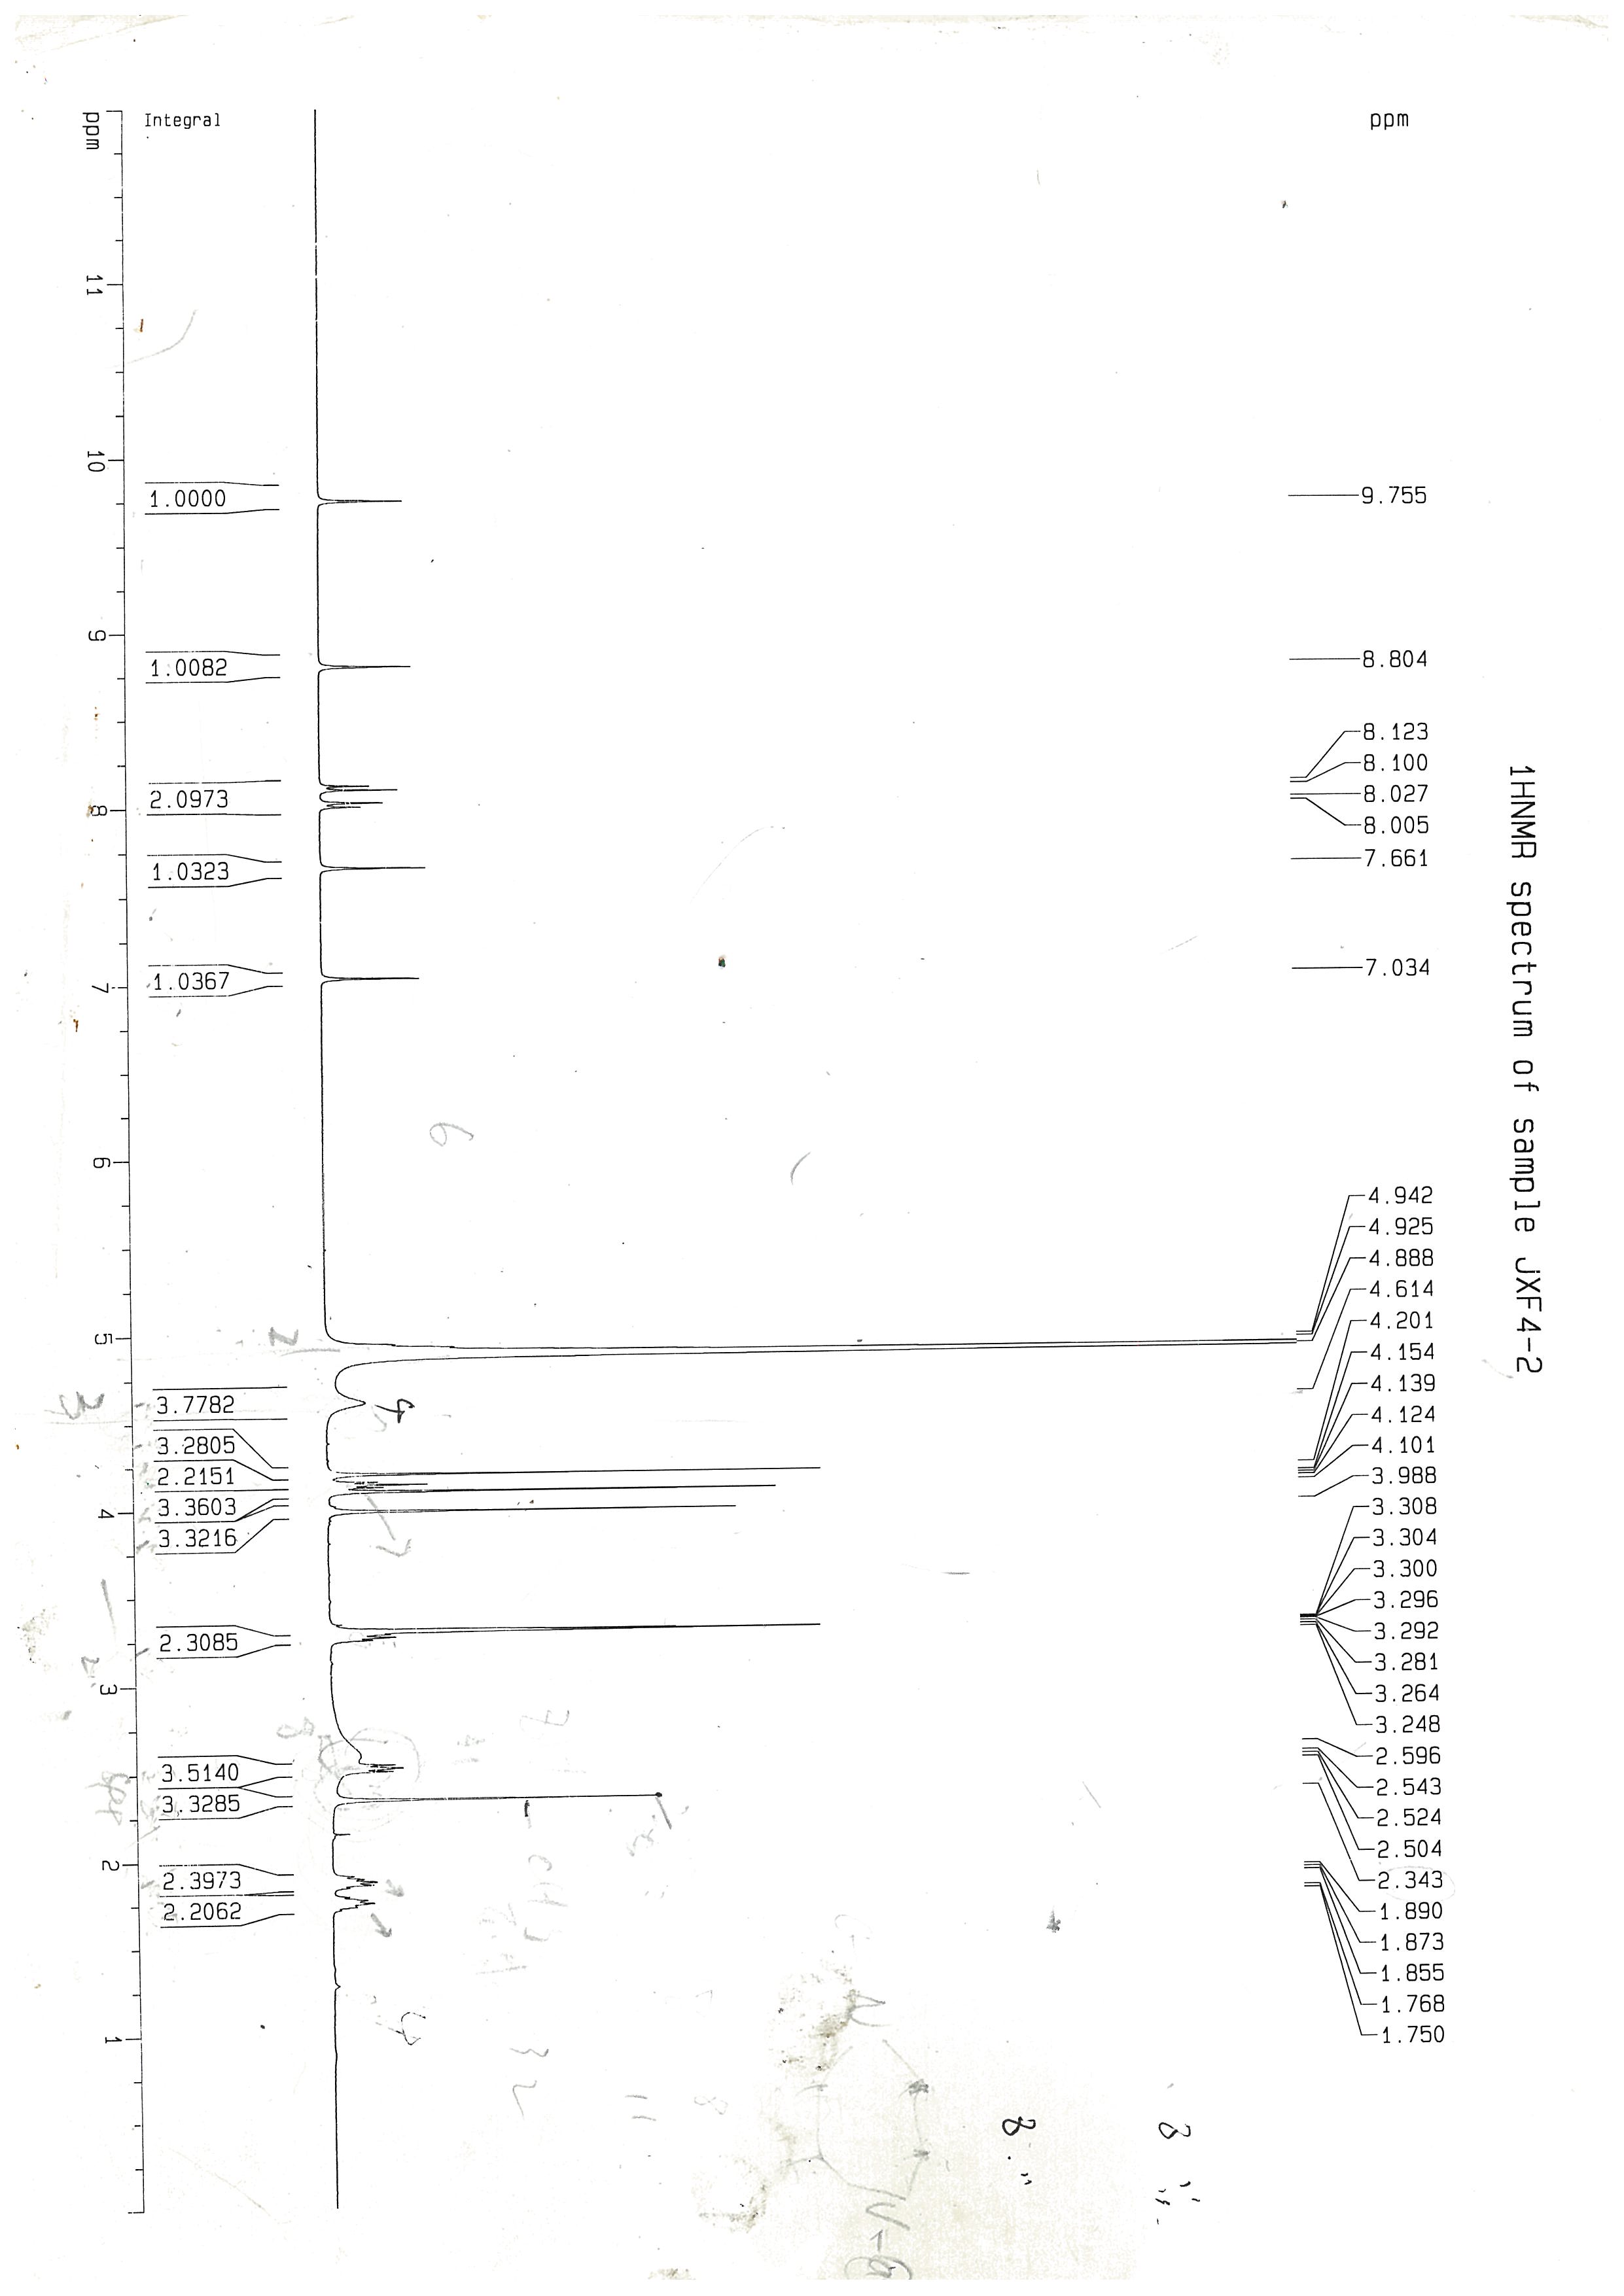

Supplement: f1 [file 3261520.f1.zip › 3261520.f1/A spectrogram of compound 3b/1HNMR of compound 3b.jpg]

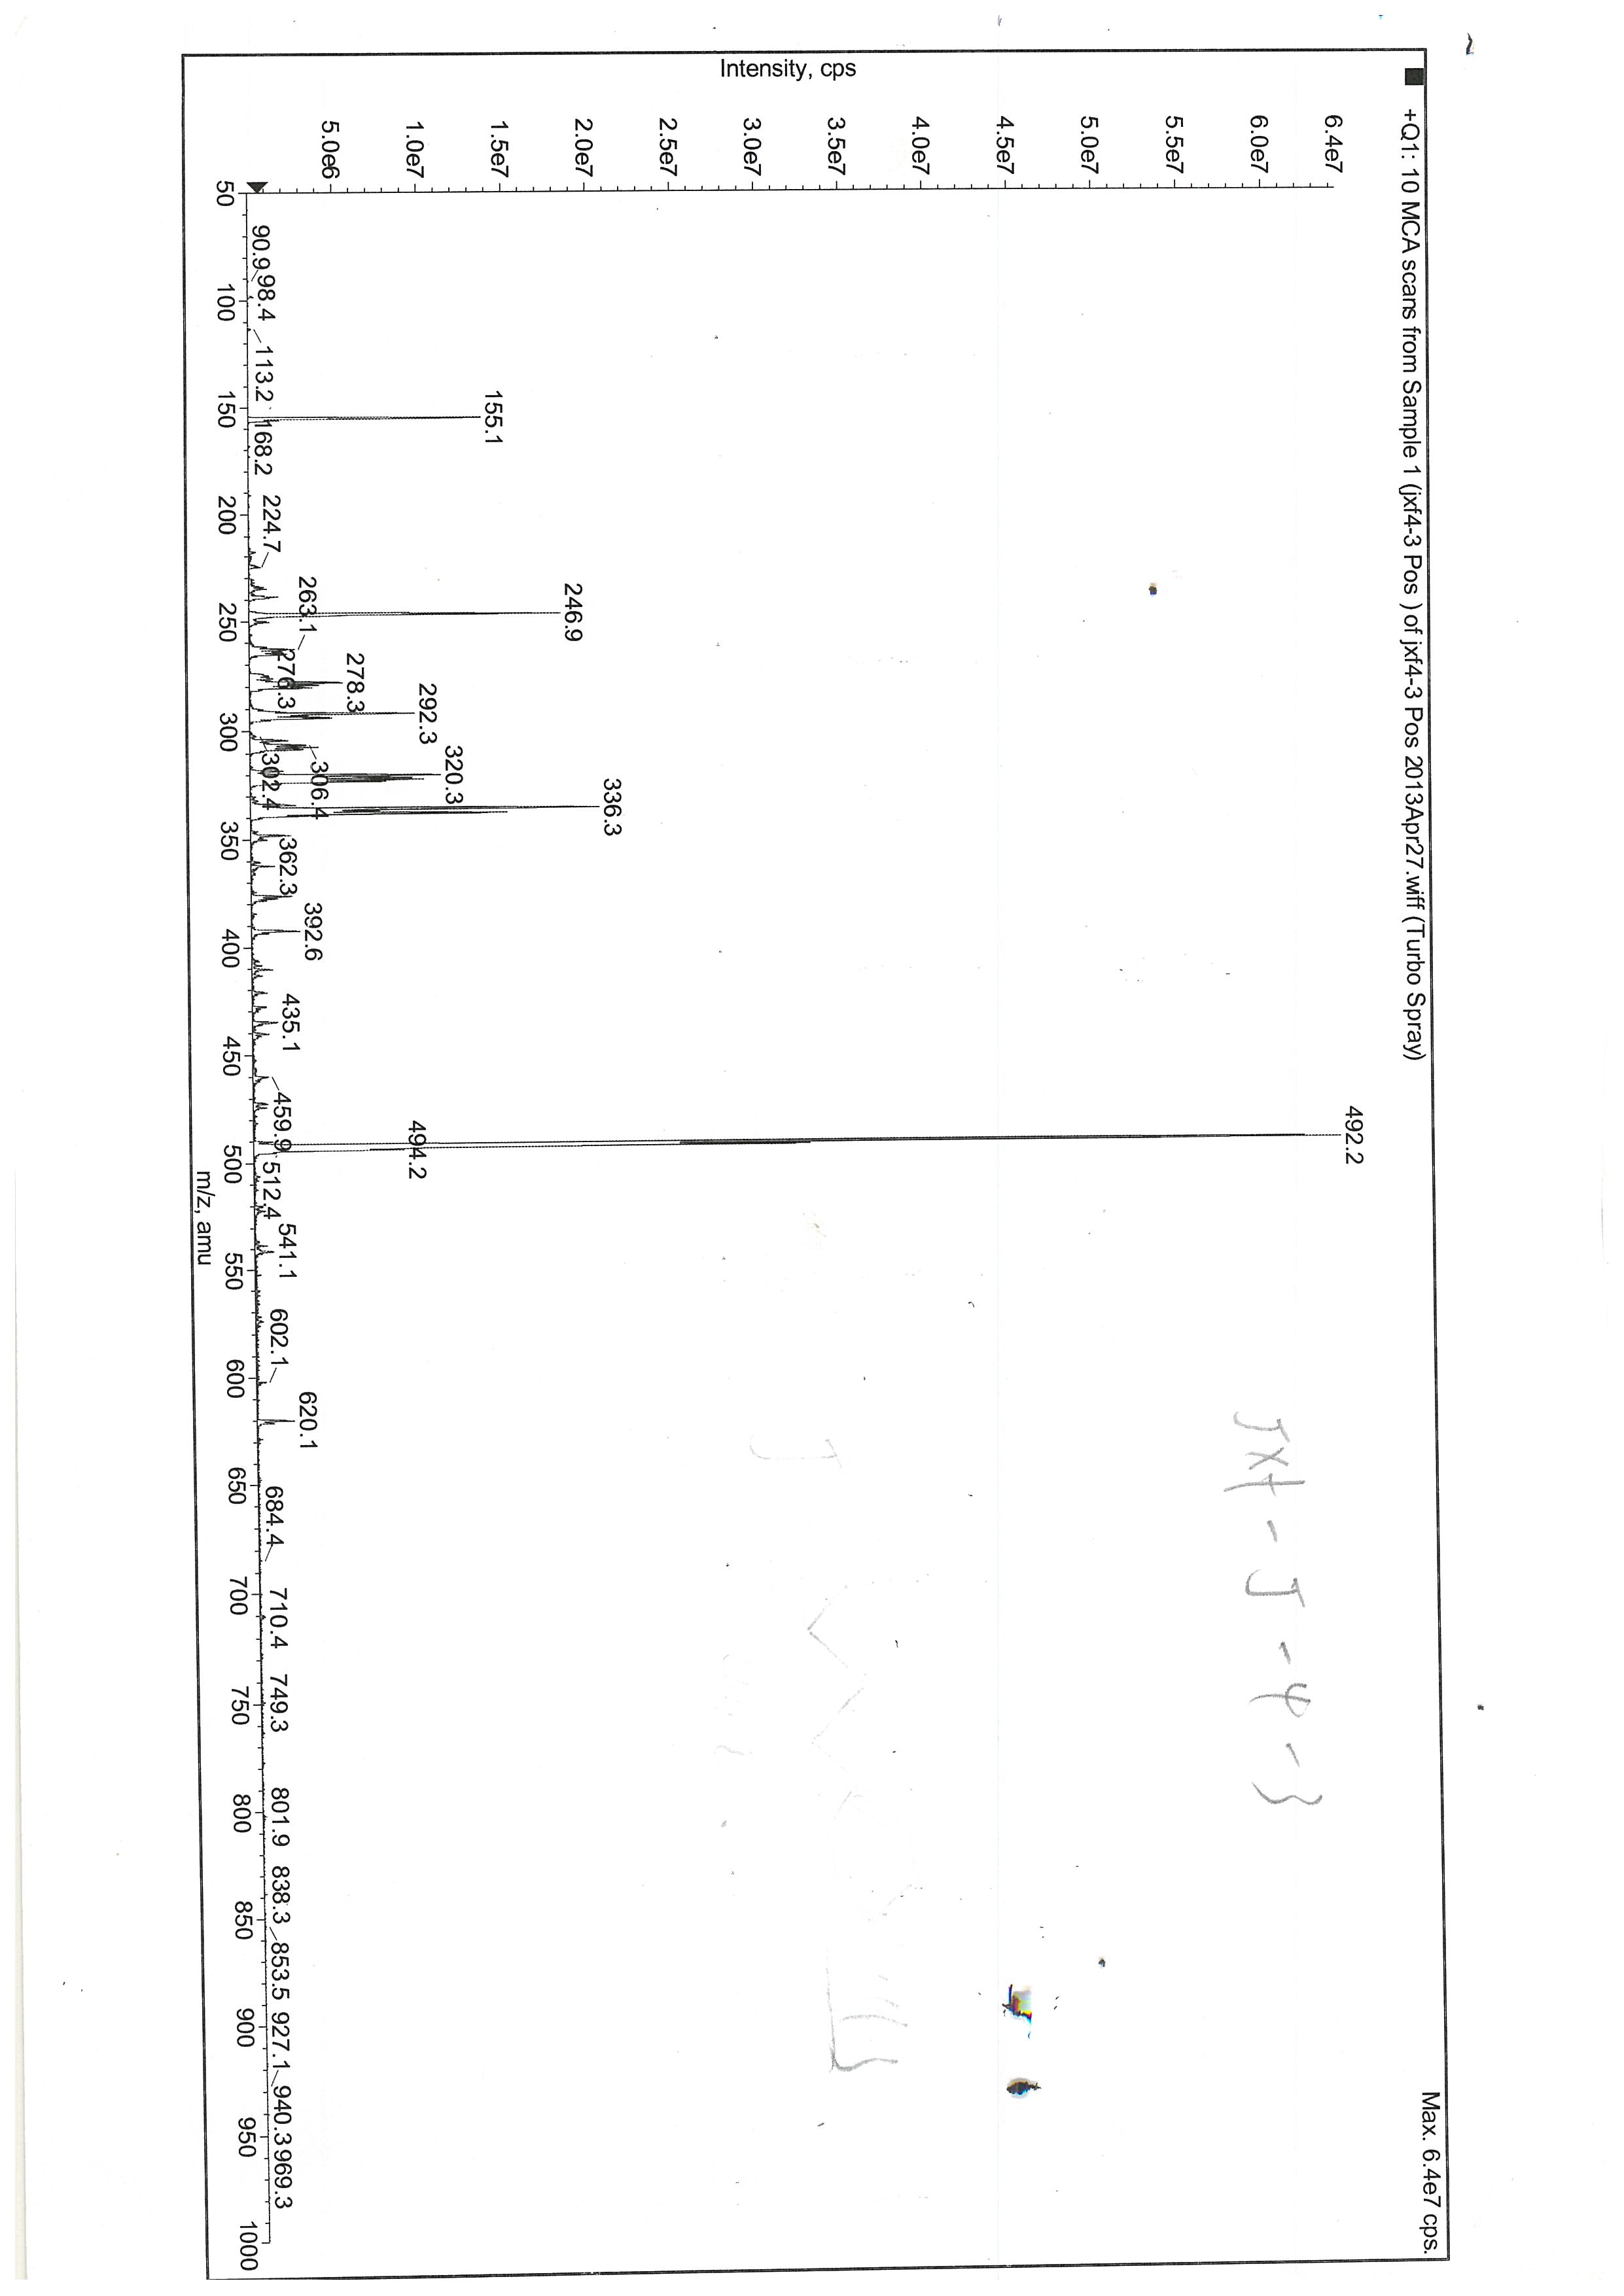

Supplement: f1 [file 3261520.f1.zip › 3261520.f1/A spectrogram of compound 3b/mass spectrogram of compound 3b.jpg]

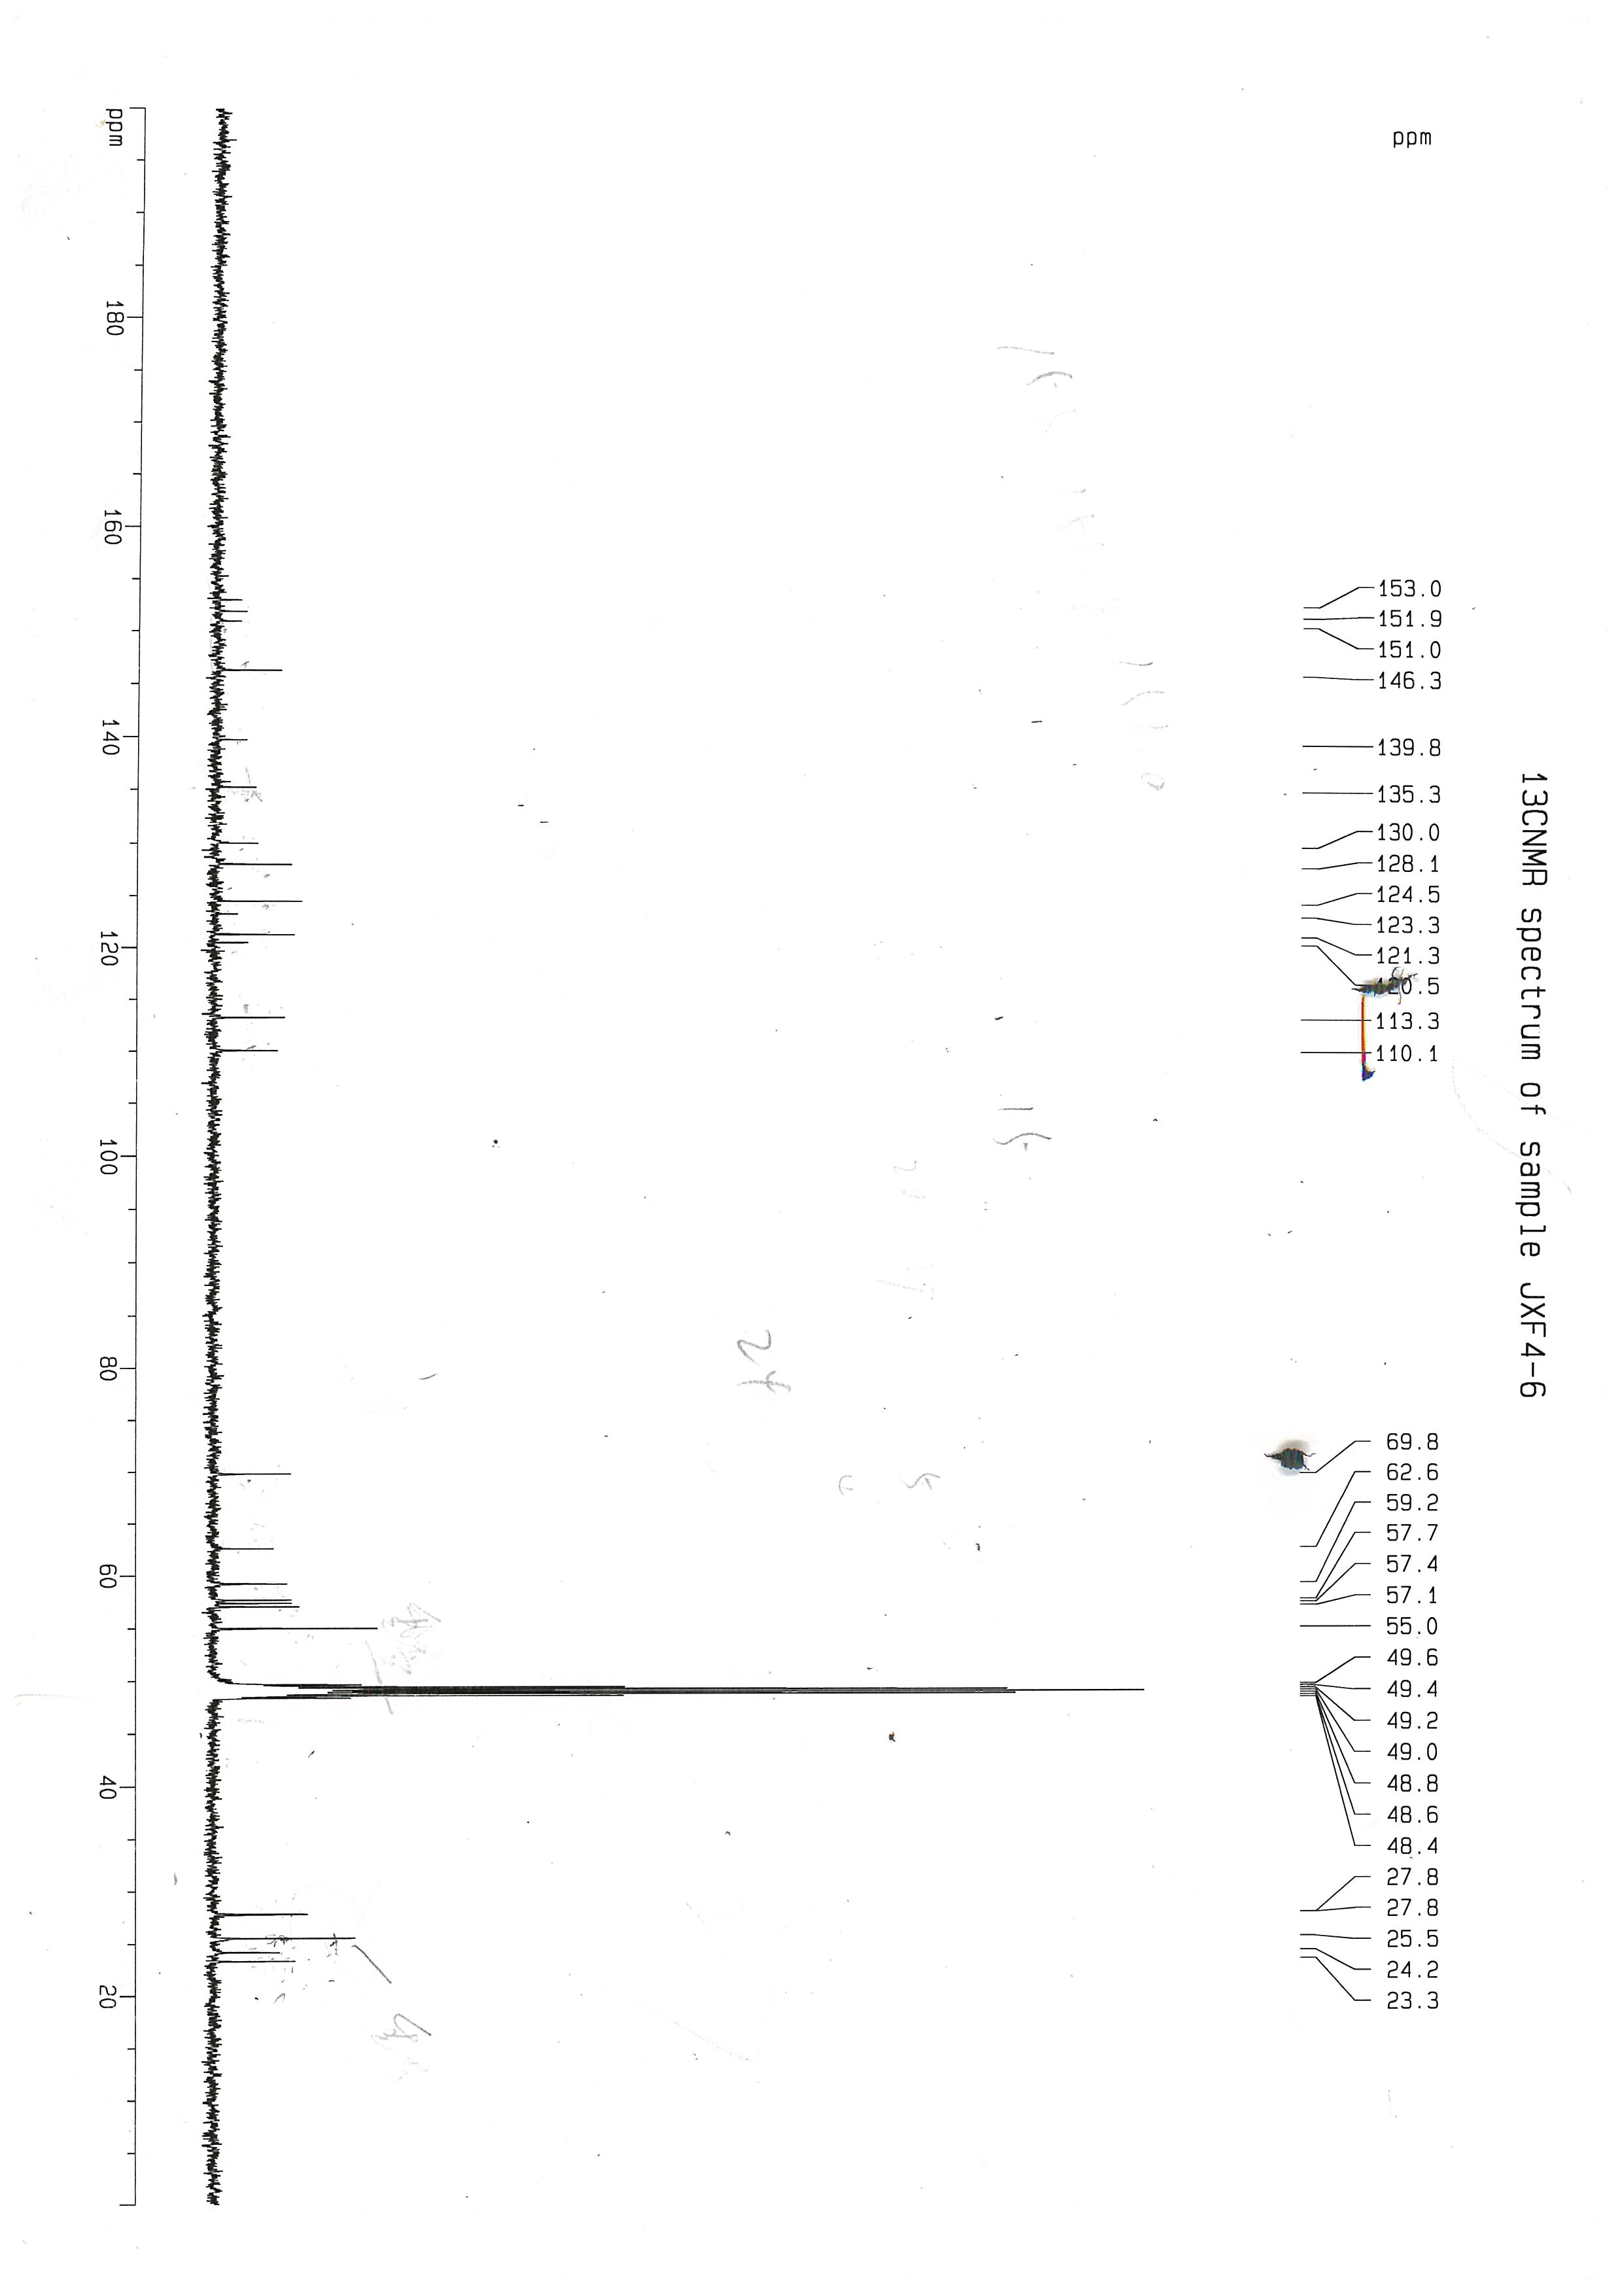

Supplement: f1 [file 3261520.f1.zip › 3261520.f1/A spectrogram of compound 3c/13CNMR of compound 3c.jpg]

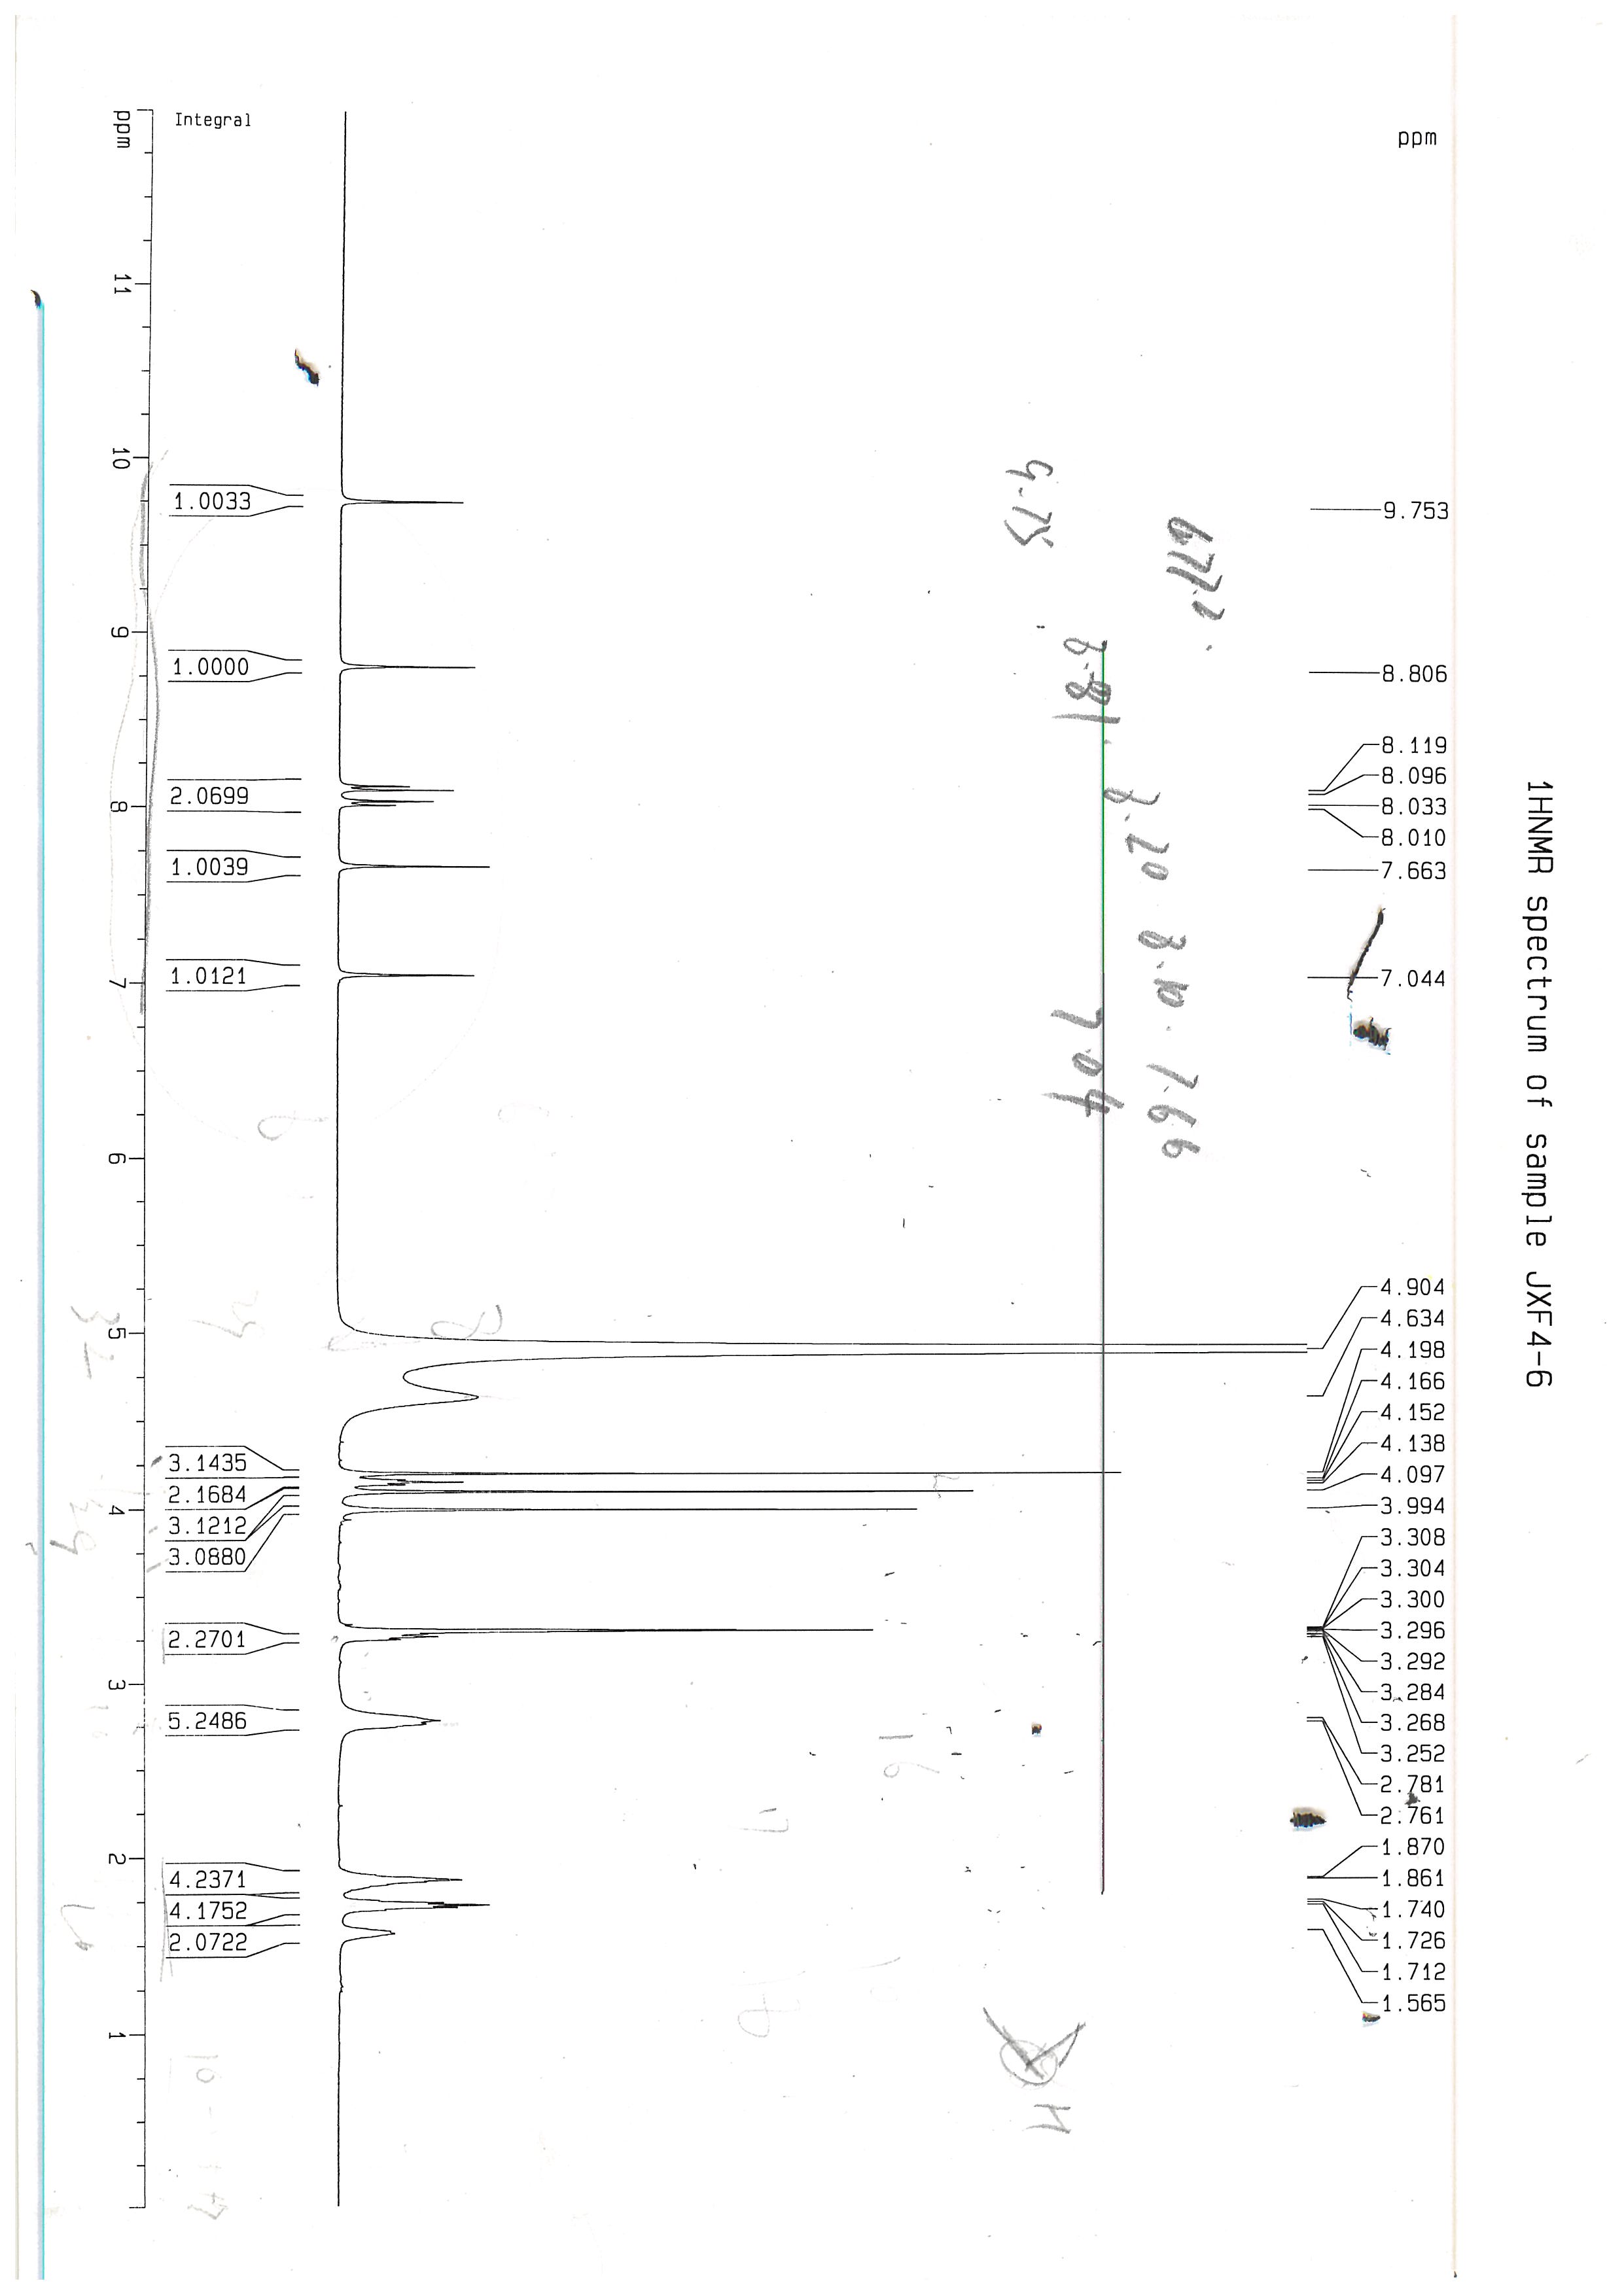

Supplement: f1 [file 3261520.f1.zip › 3261520.f1/A spectrogram of compound 3c/1HNMR of compound 3c.jpg]

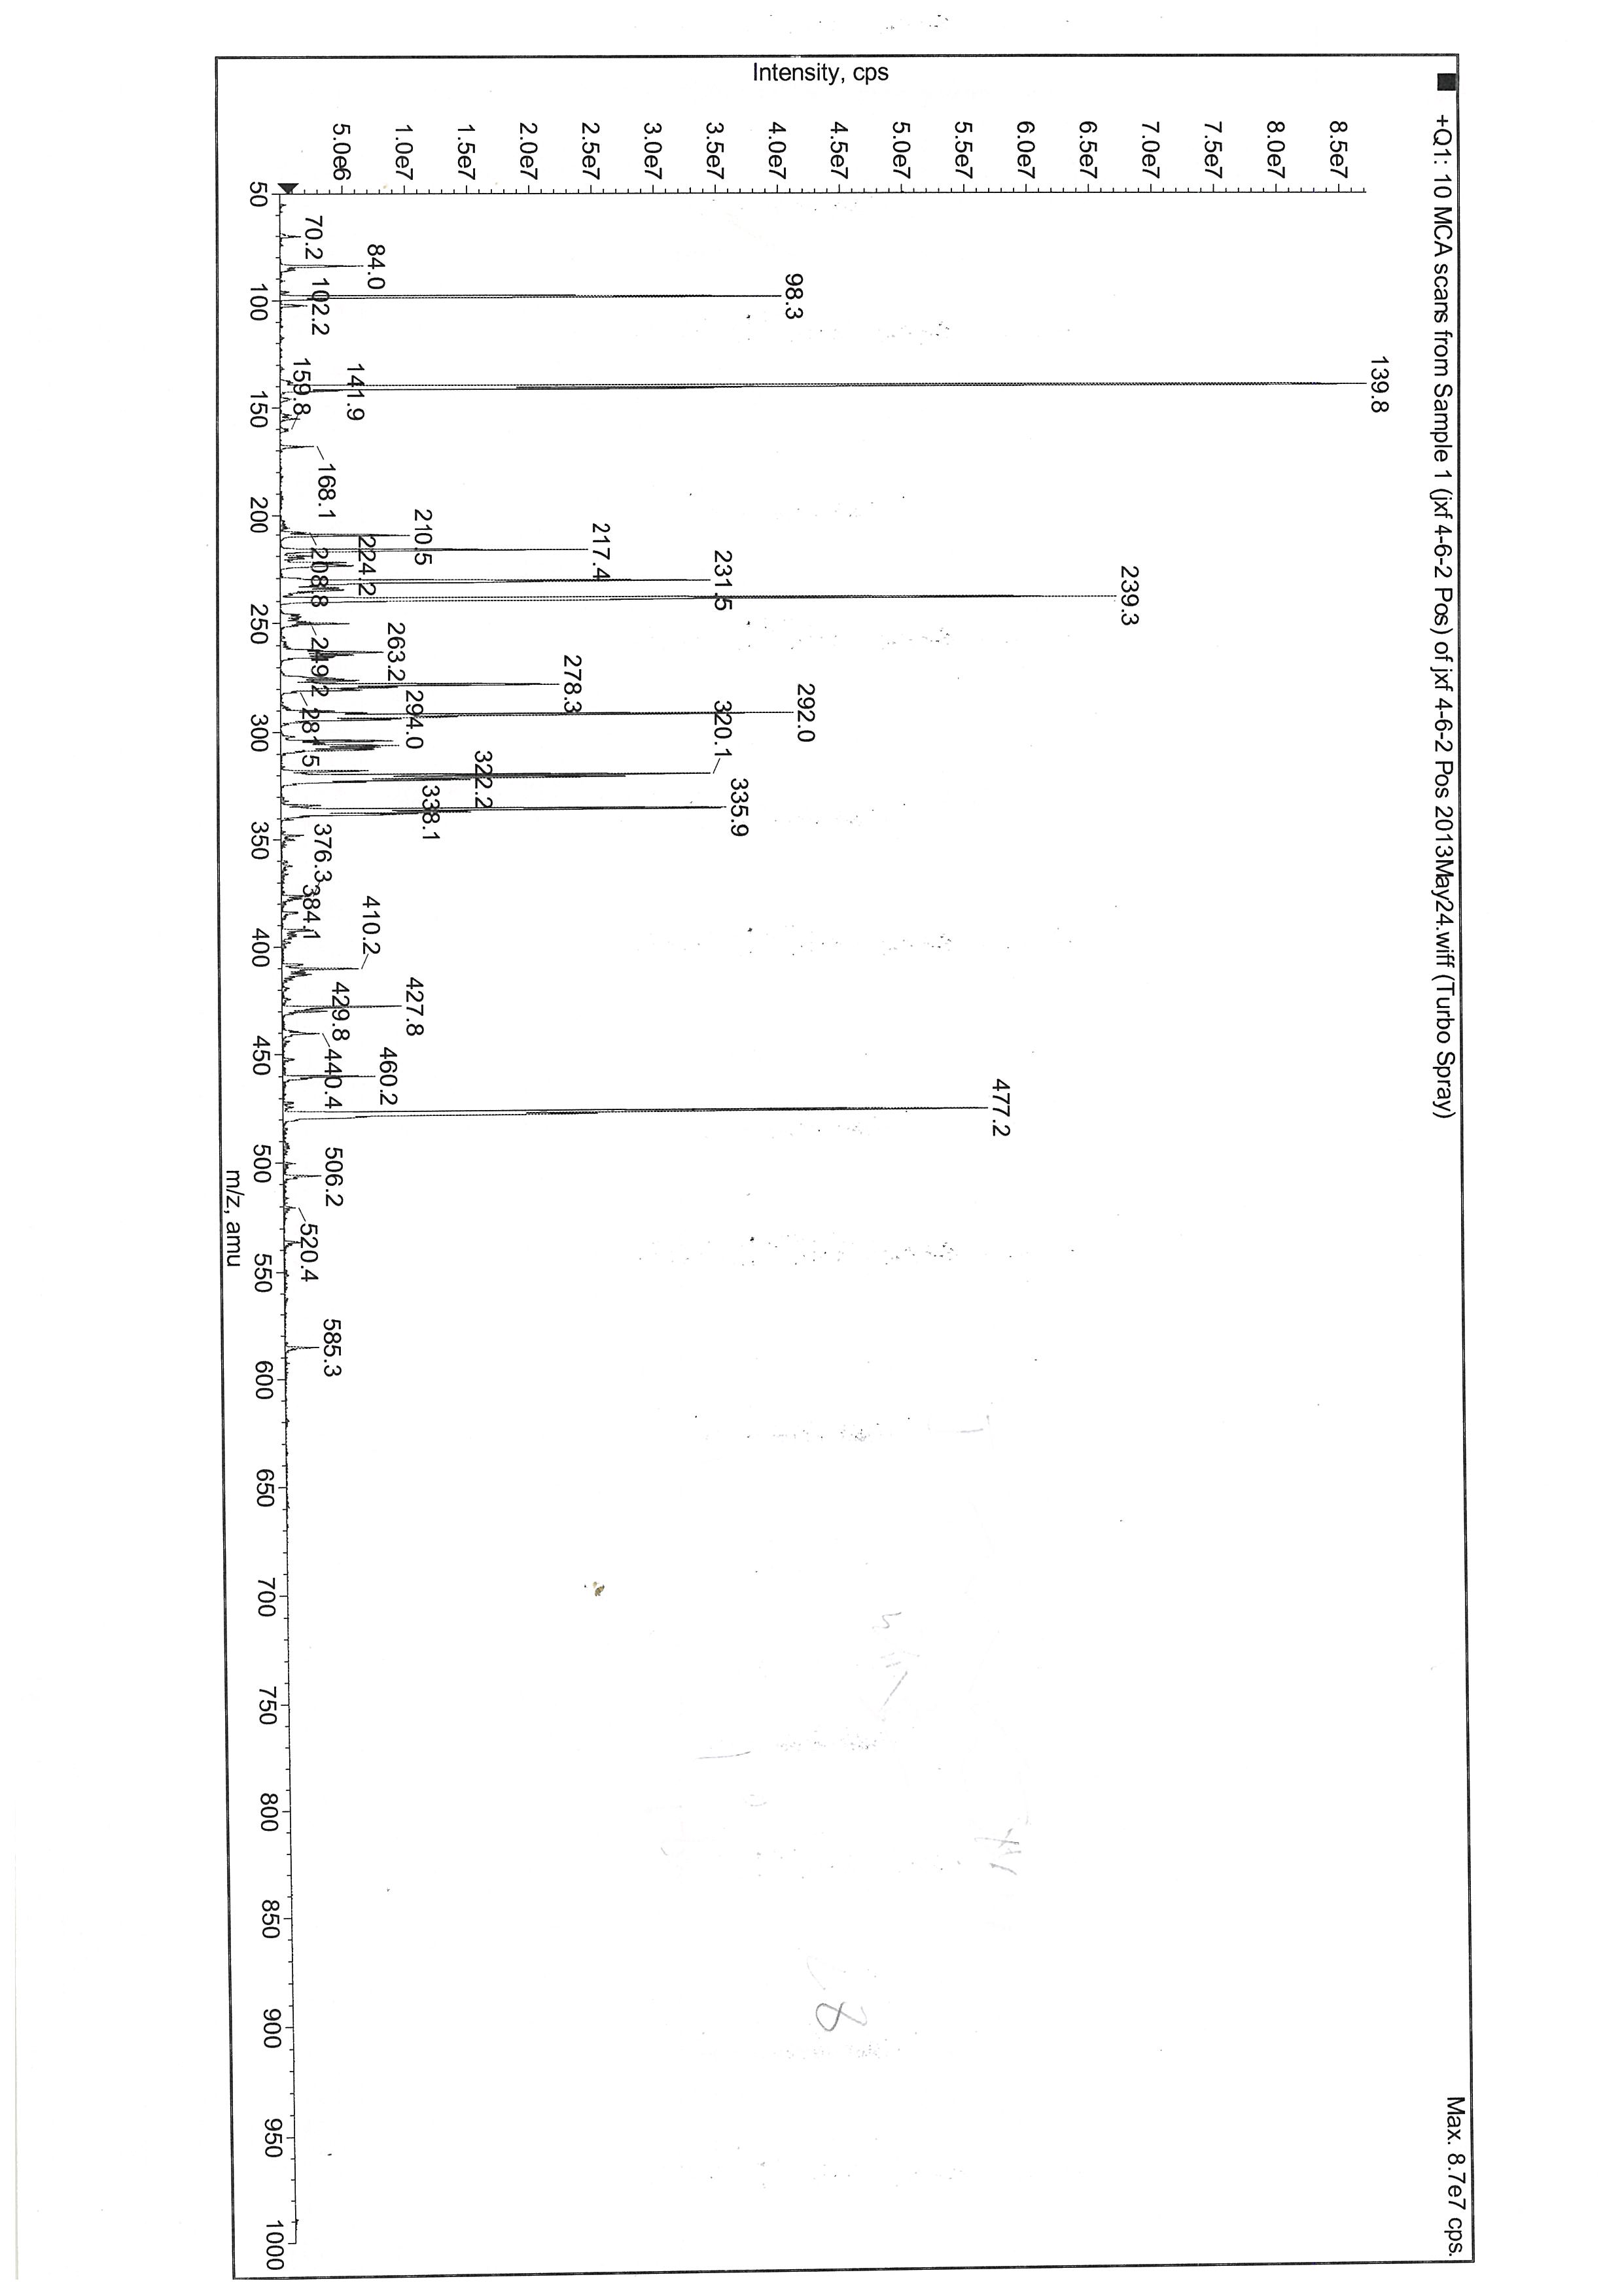

Supplement: f1 [file 3261520.f1.zip › 3261520.f1/A spectrogram of compound 3c/mass spectrogram of compound 3c.jpg]

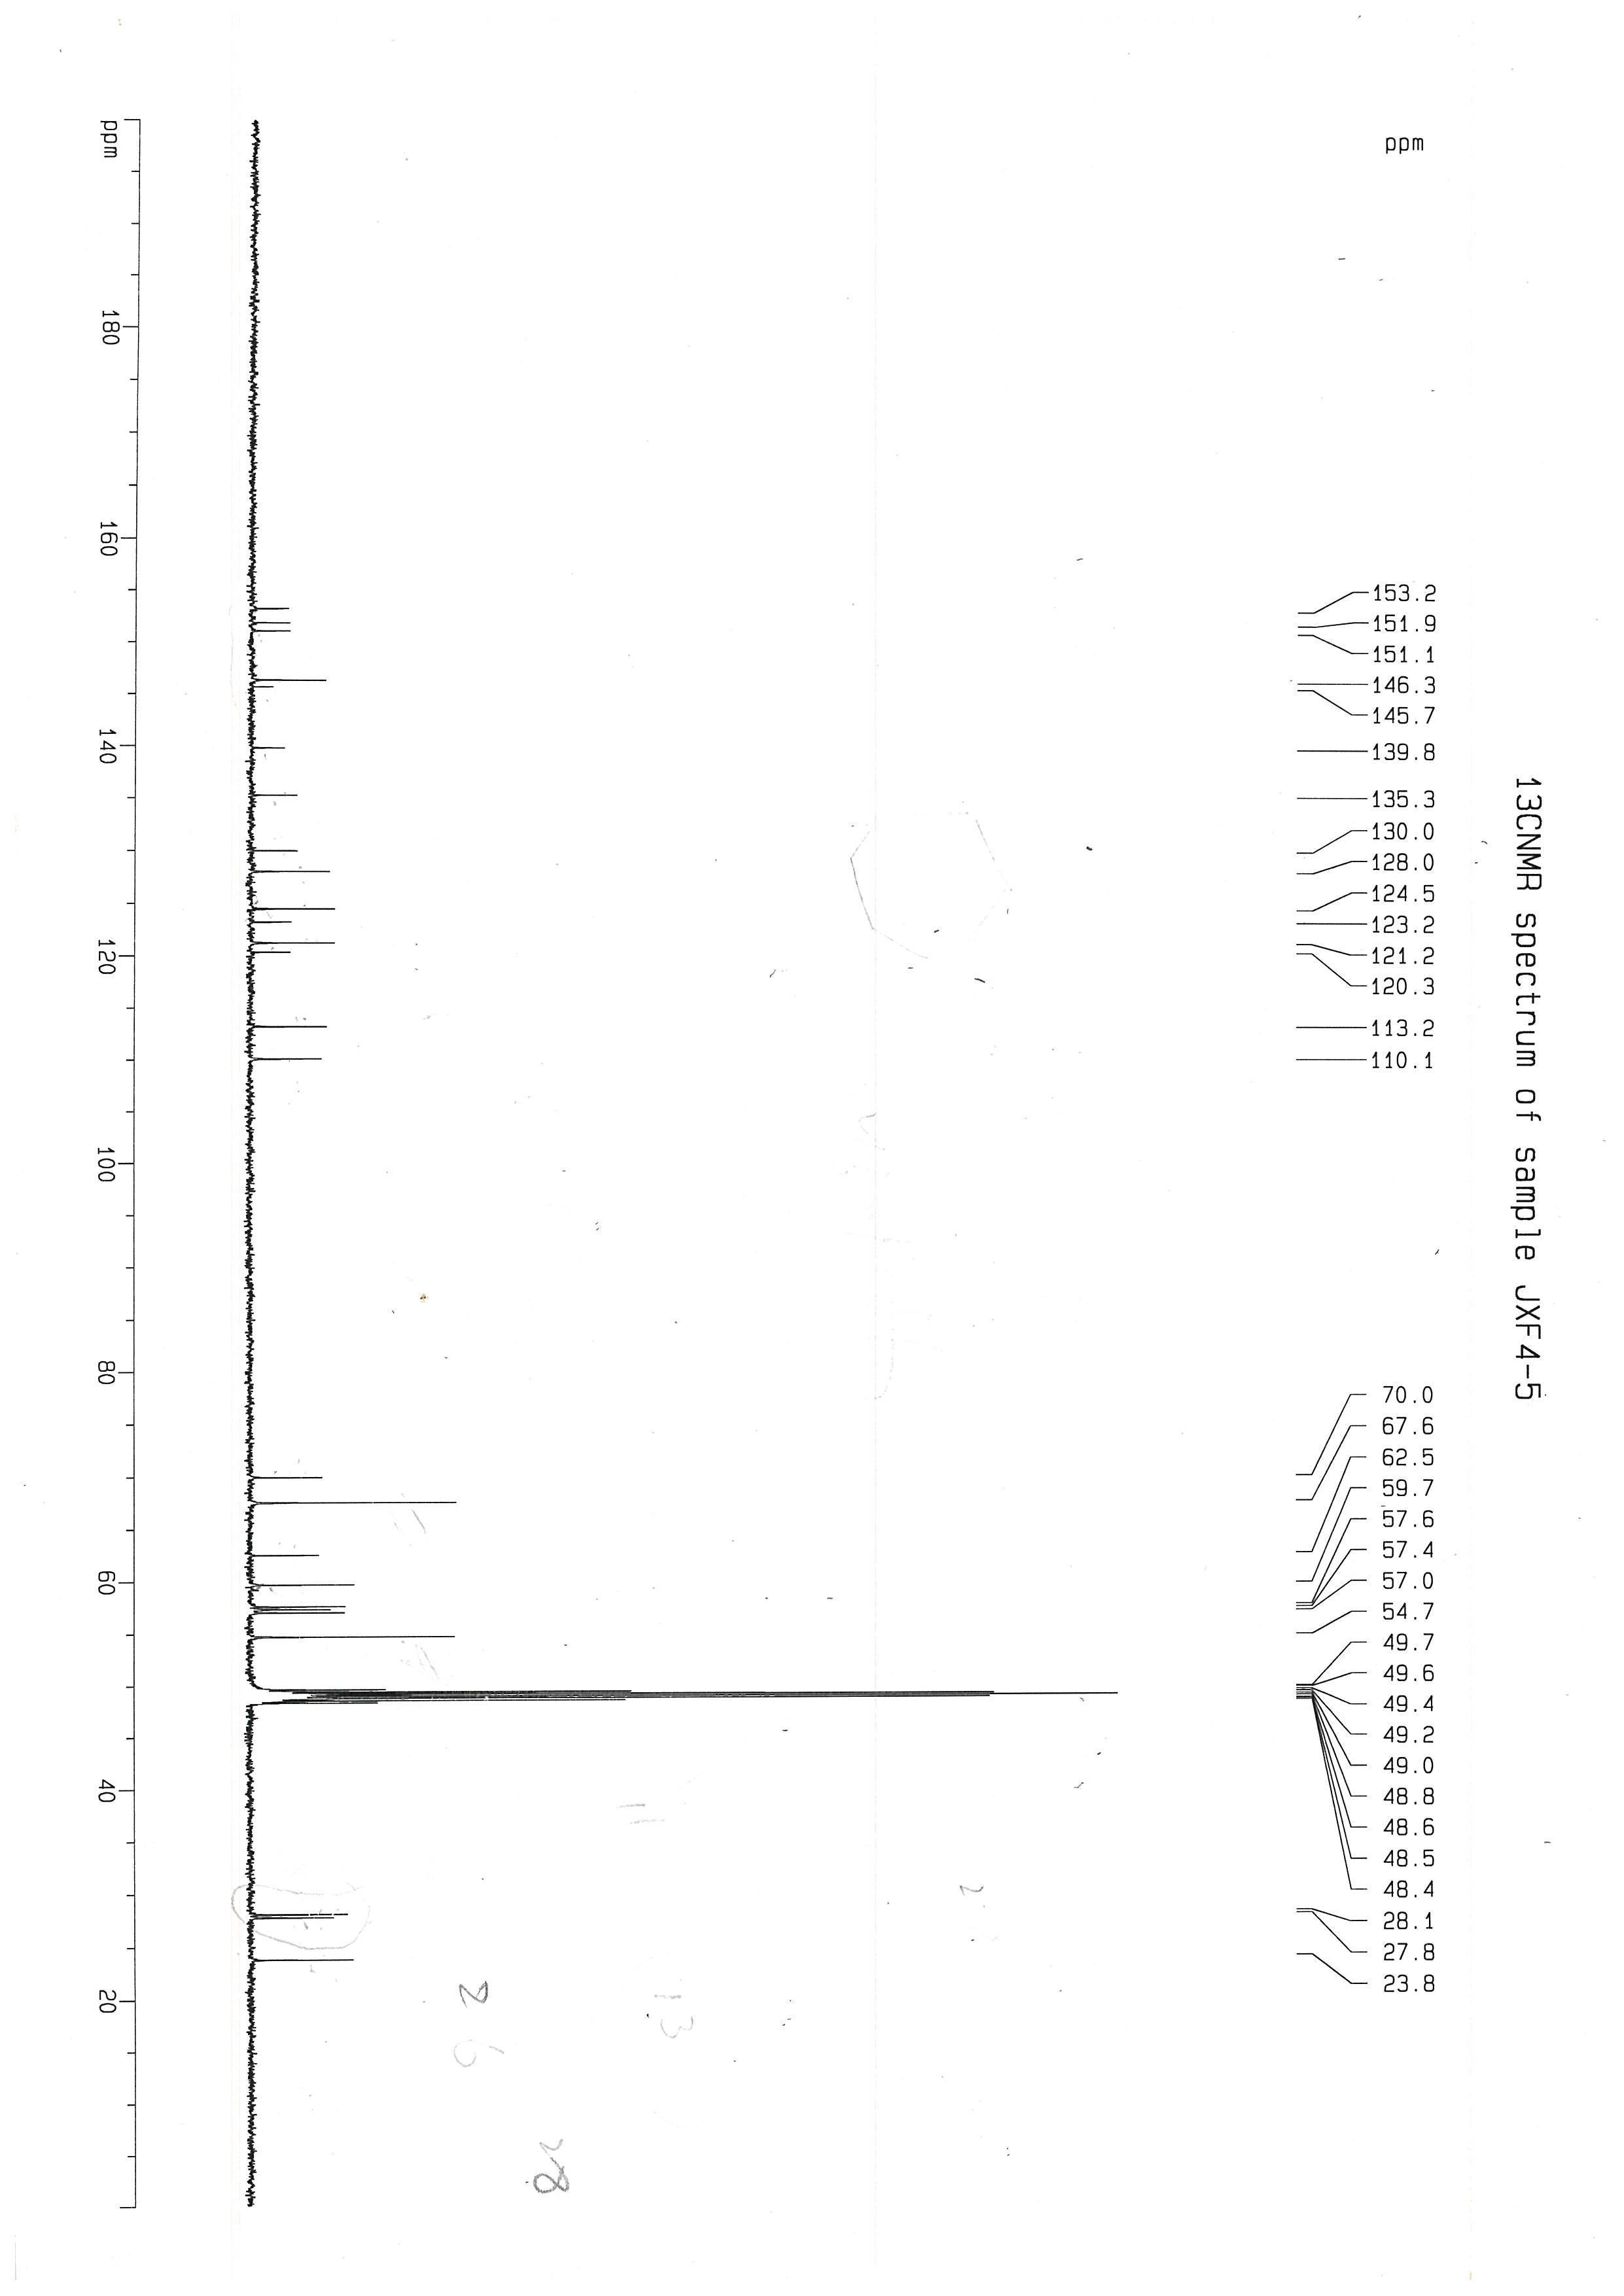

Supplement: f1 [file 3261520.f1.zip › 3261520.f1/A spectrogram of compound 3d/13CNMR of compound 3d.jpg]

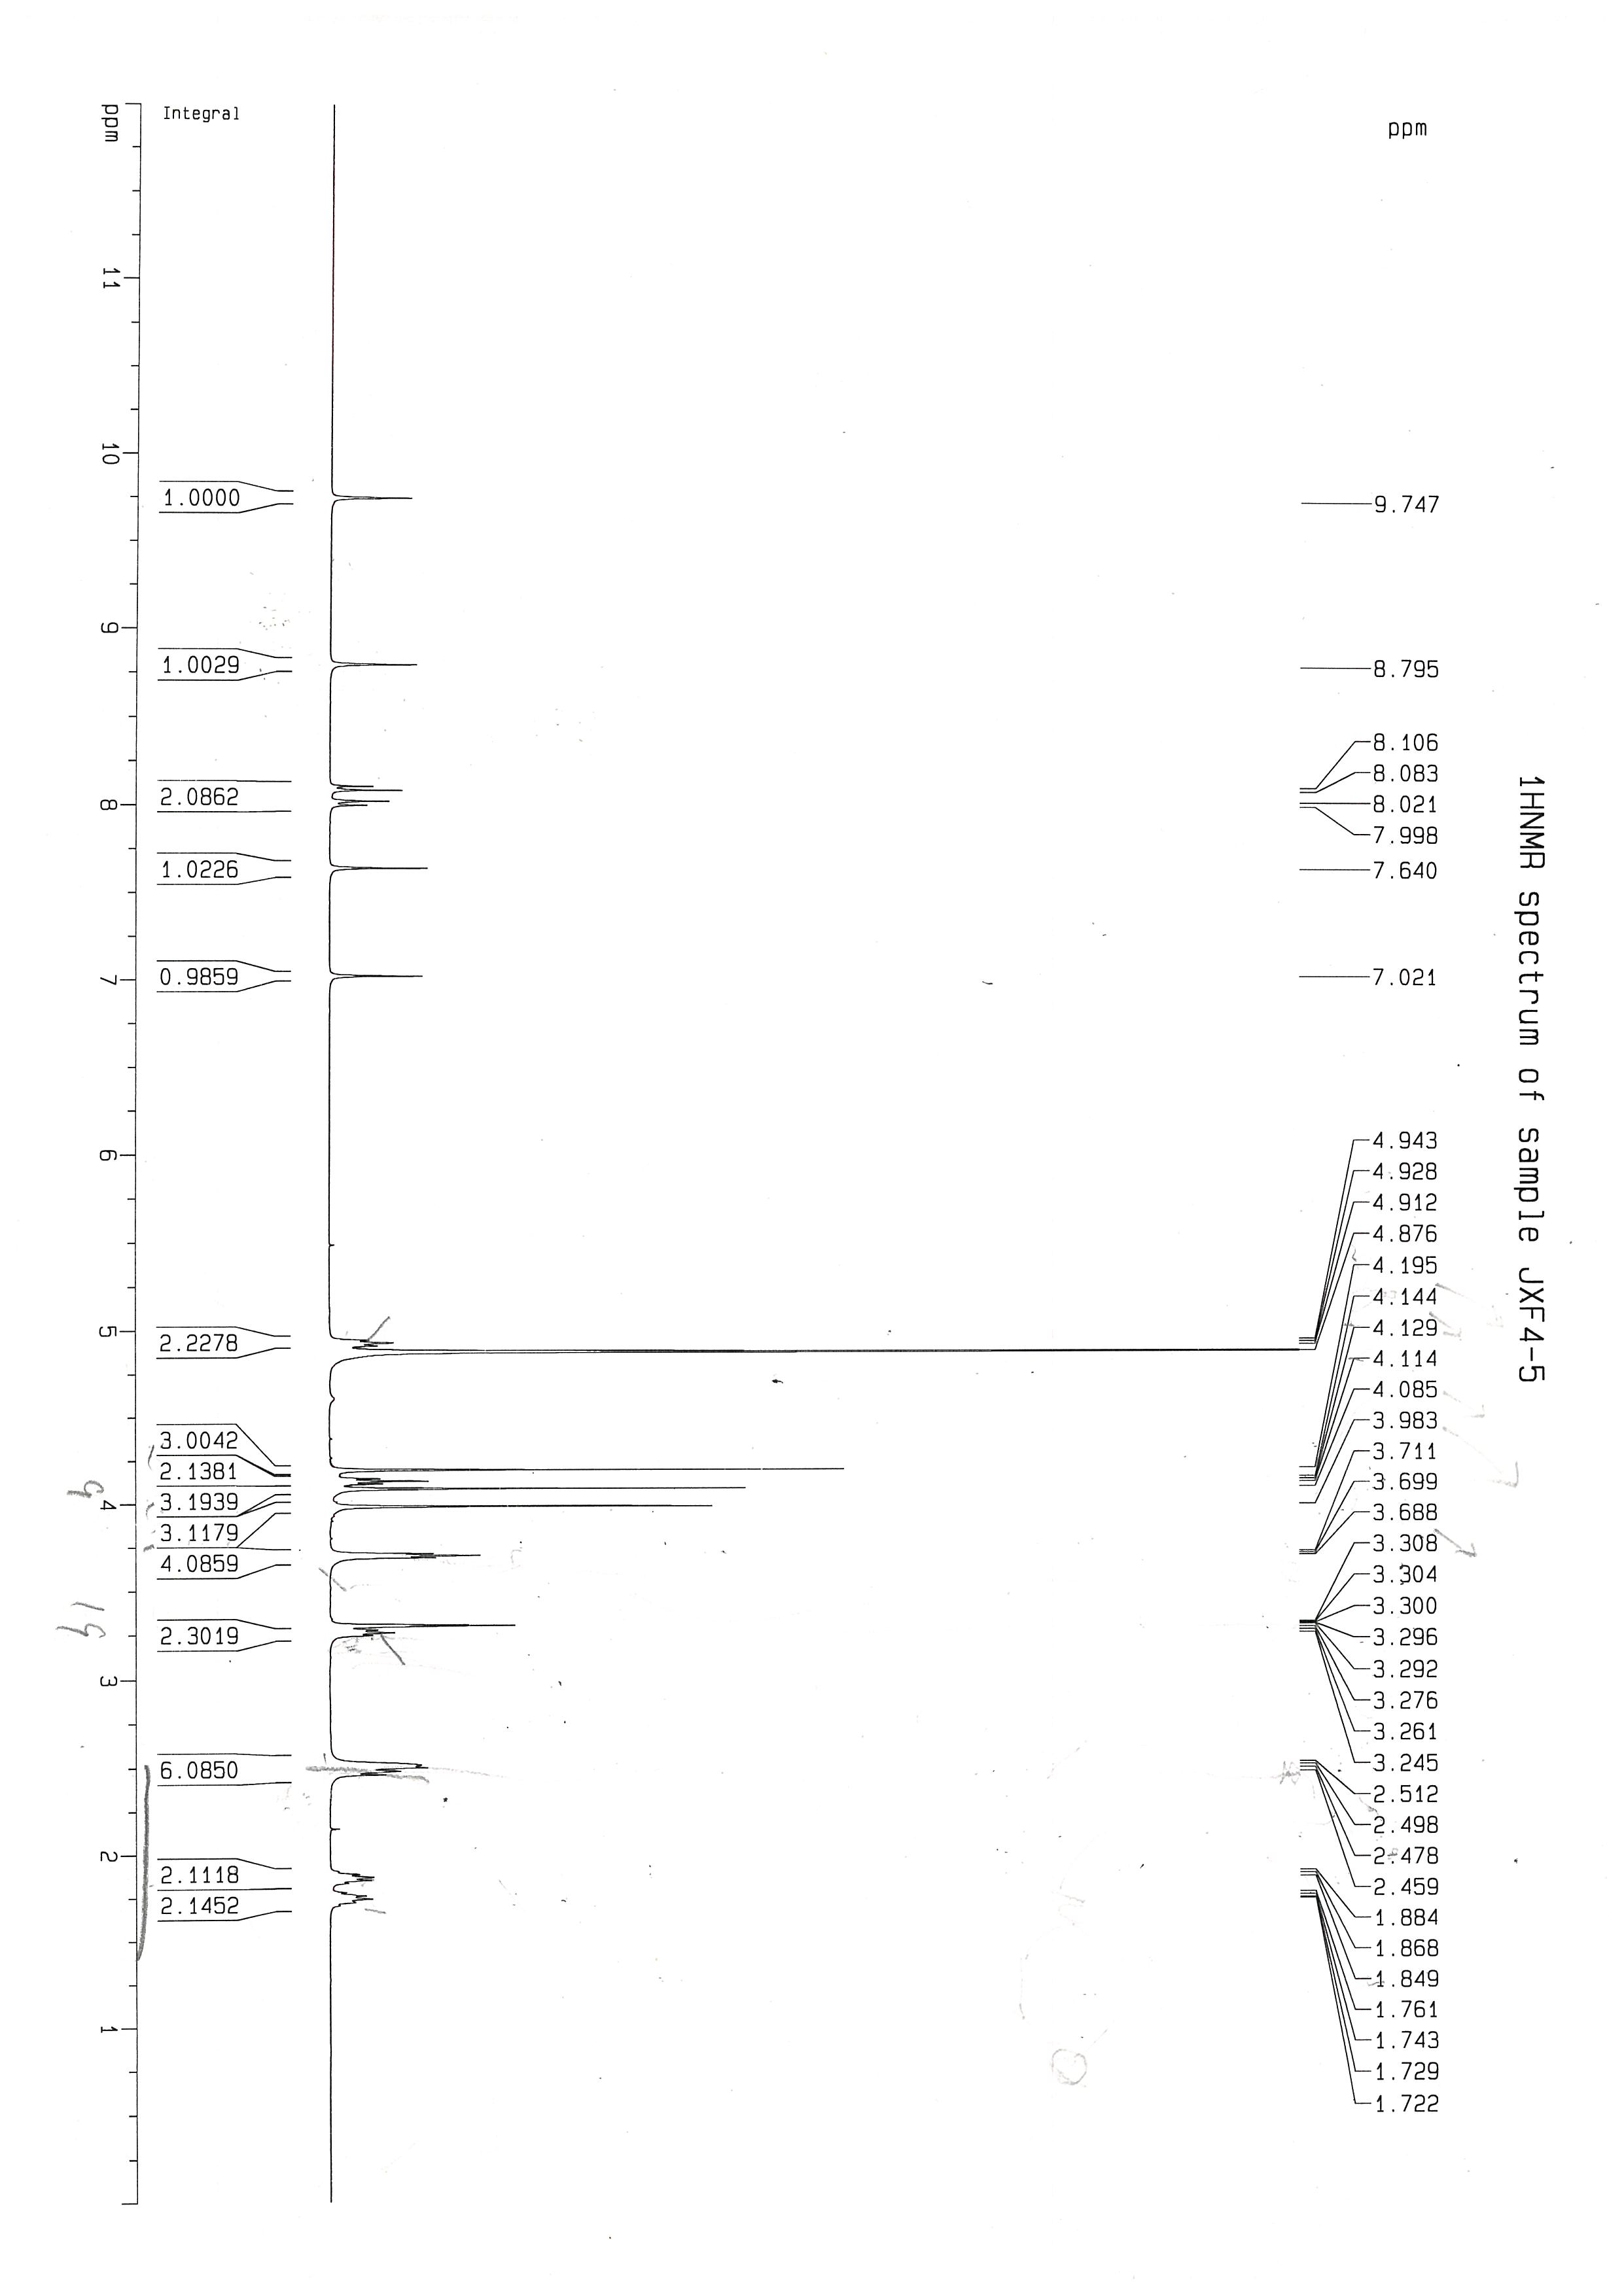

Supplement: f1 [file 3261520.f1.zip › 3261520.f1/A spectrogram of compound 3d/1HNMR of compound 3d.jpg]

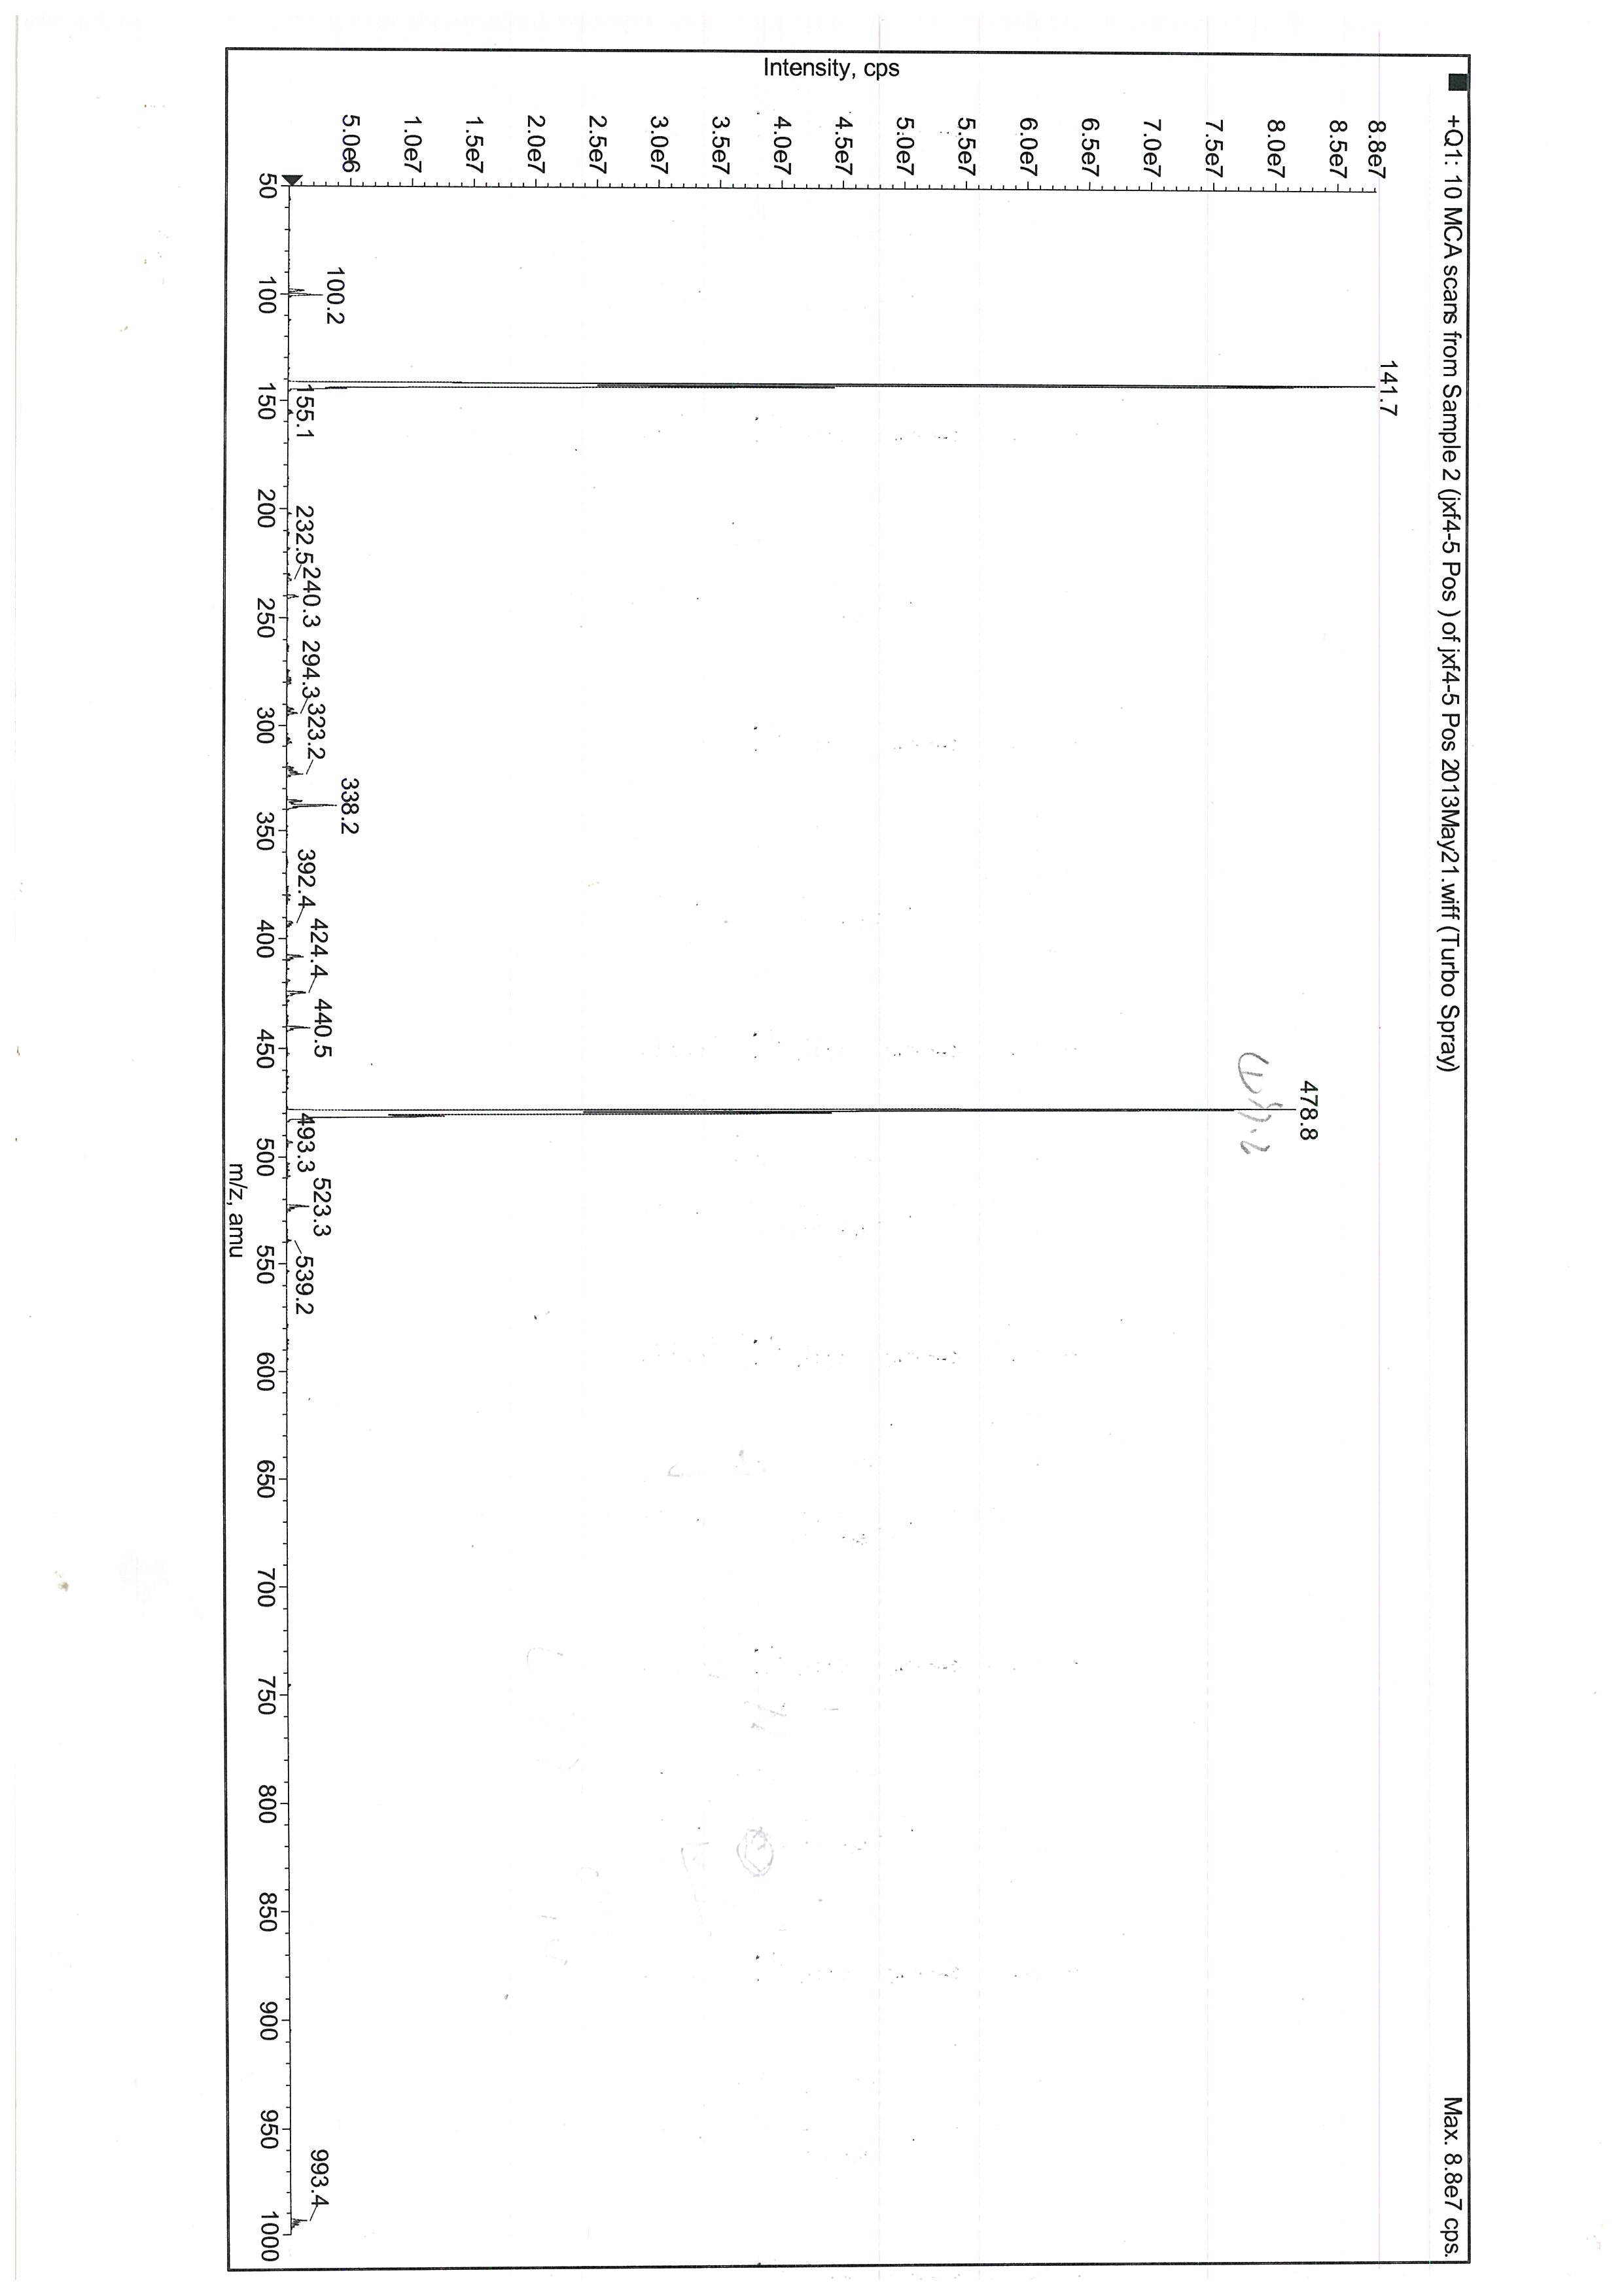

Supplement: f1 [file 3261520.f1.zip › 3261520.f1/A spectrogram of compound 3d/mass spectrogram of compound 3d.jpg]

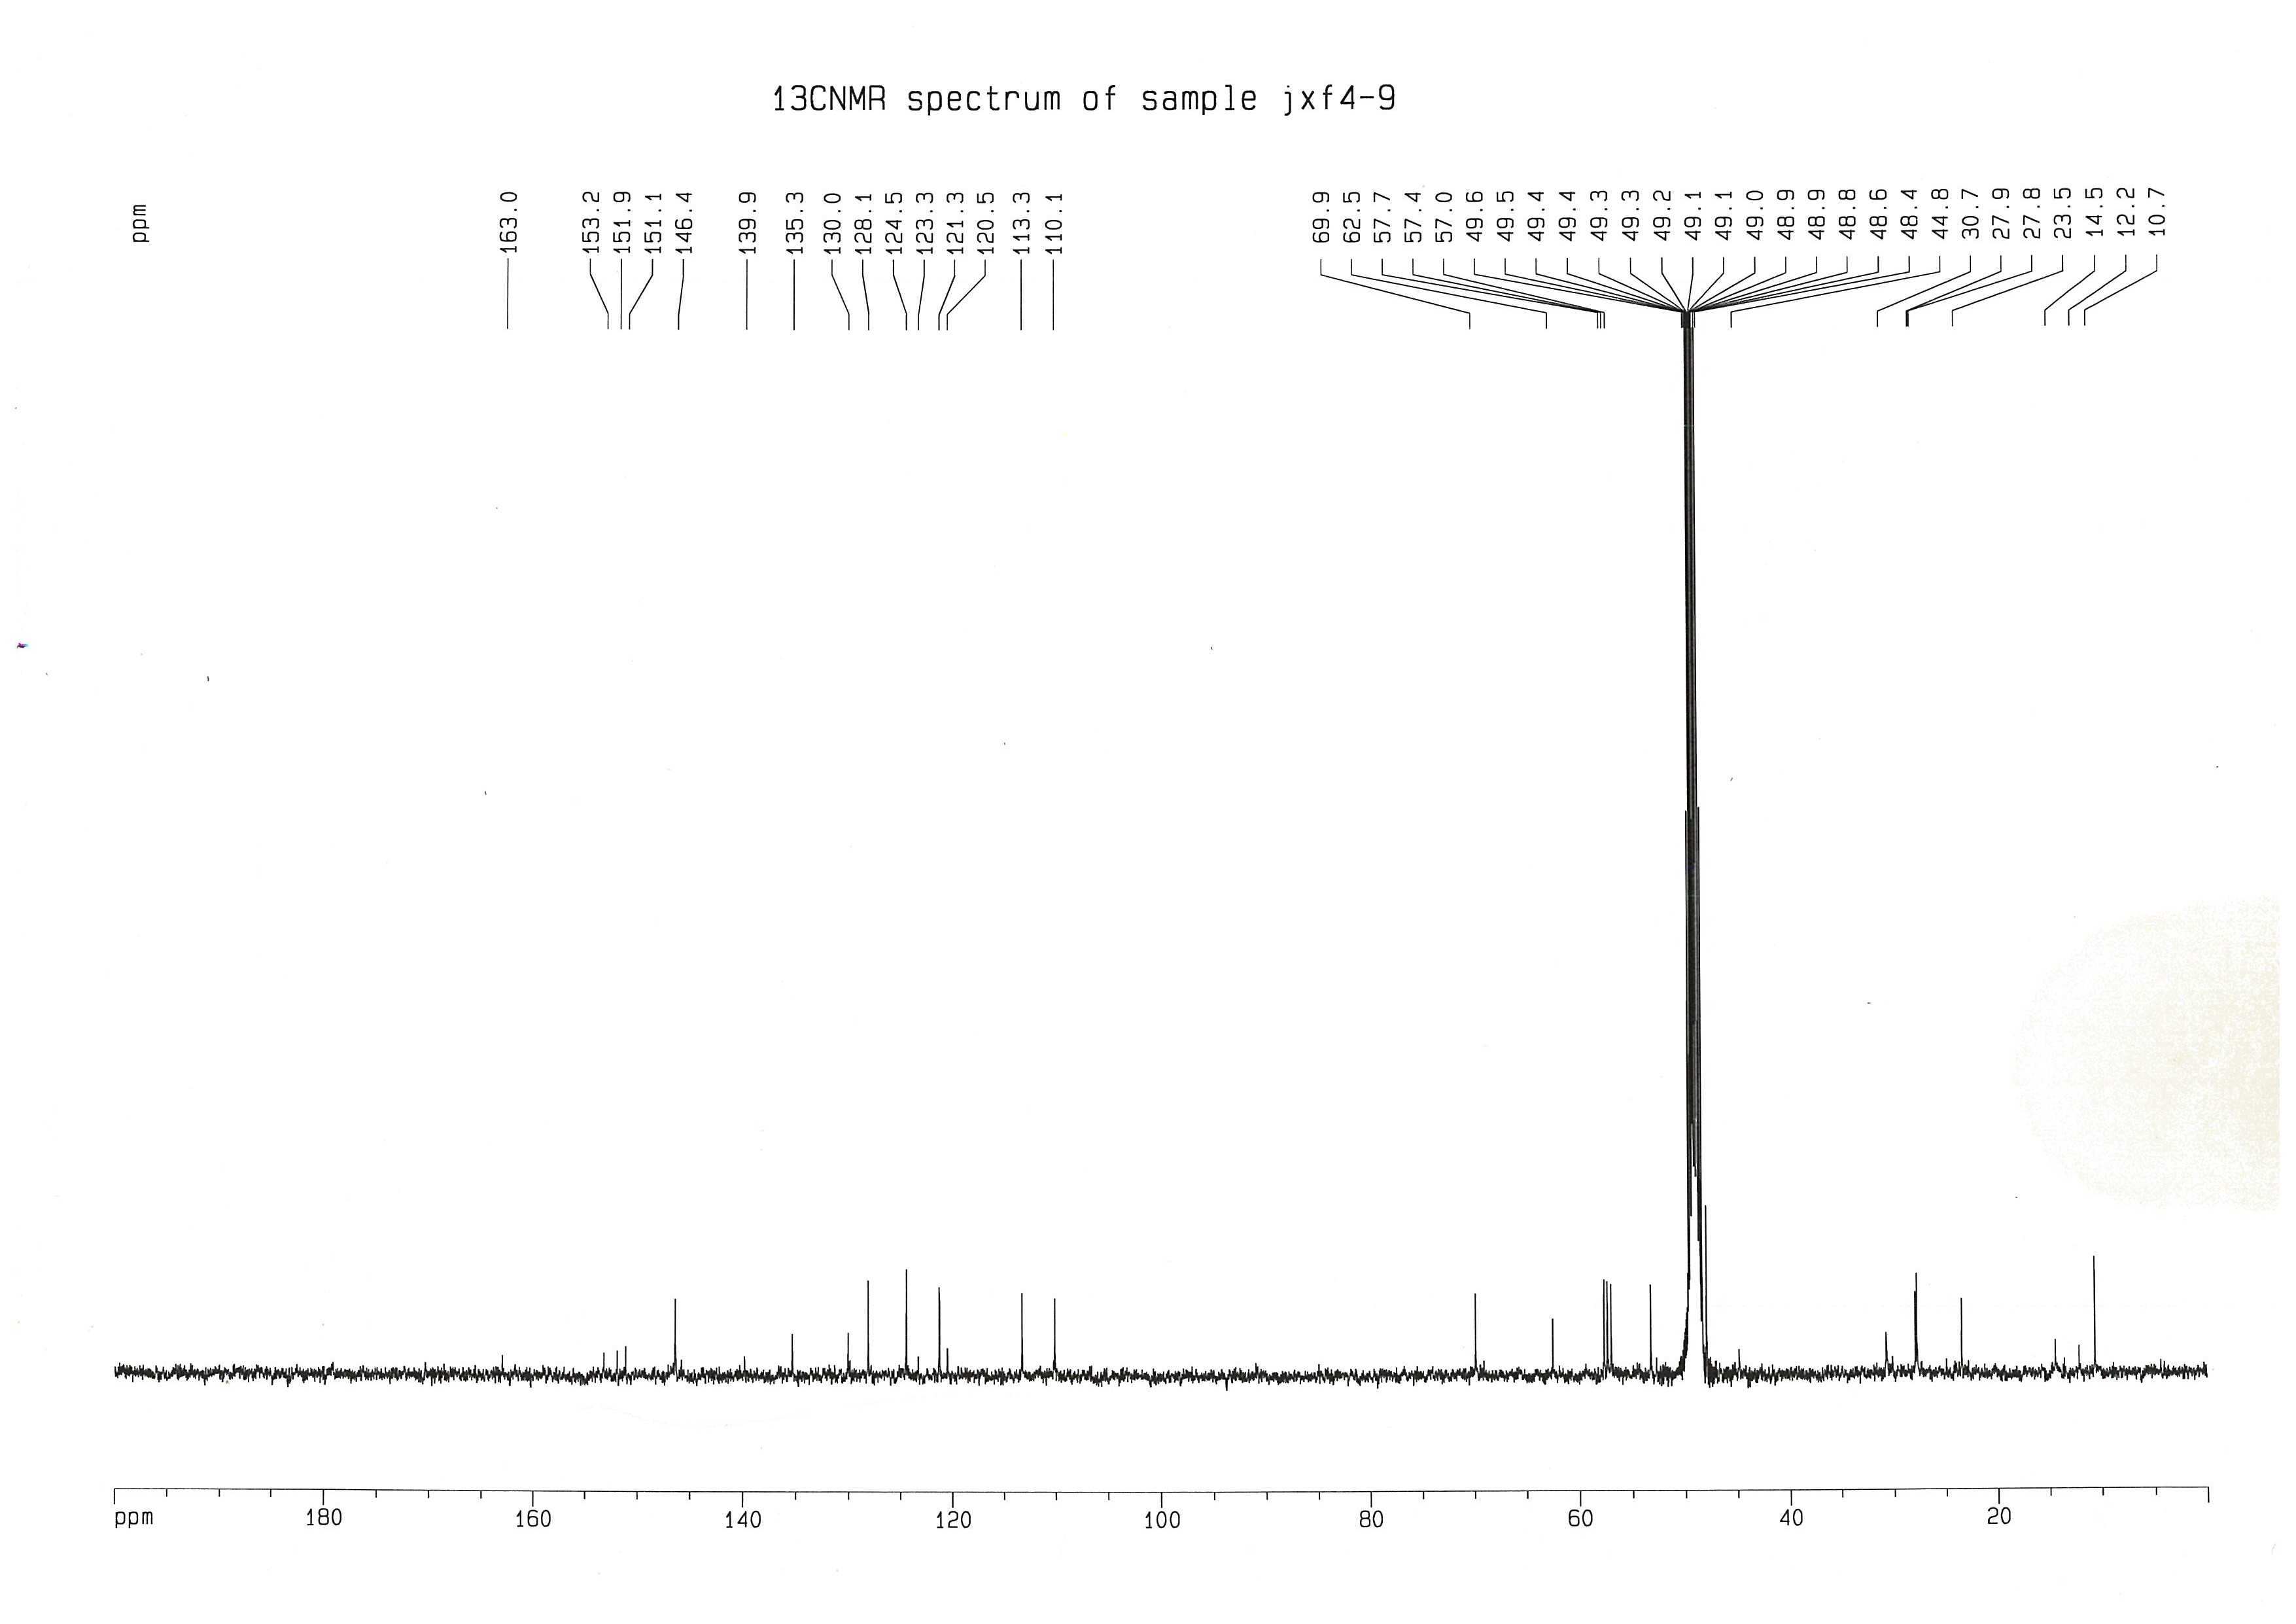

Supplement: f1 [file 3261520.f1.zip › 3261520.f1/A spectrogram of compound 3e/13CNMR of compound 3e.jpg]

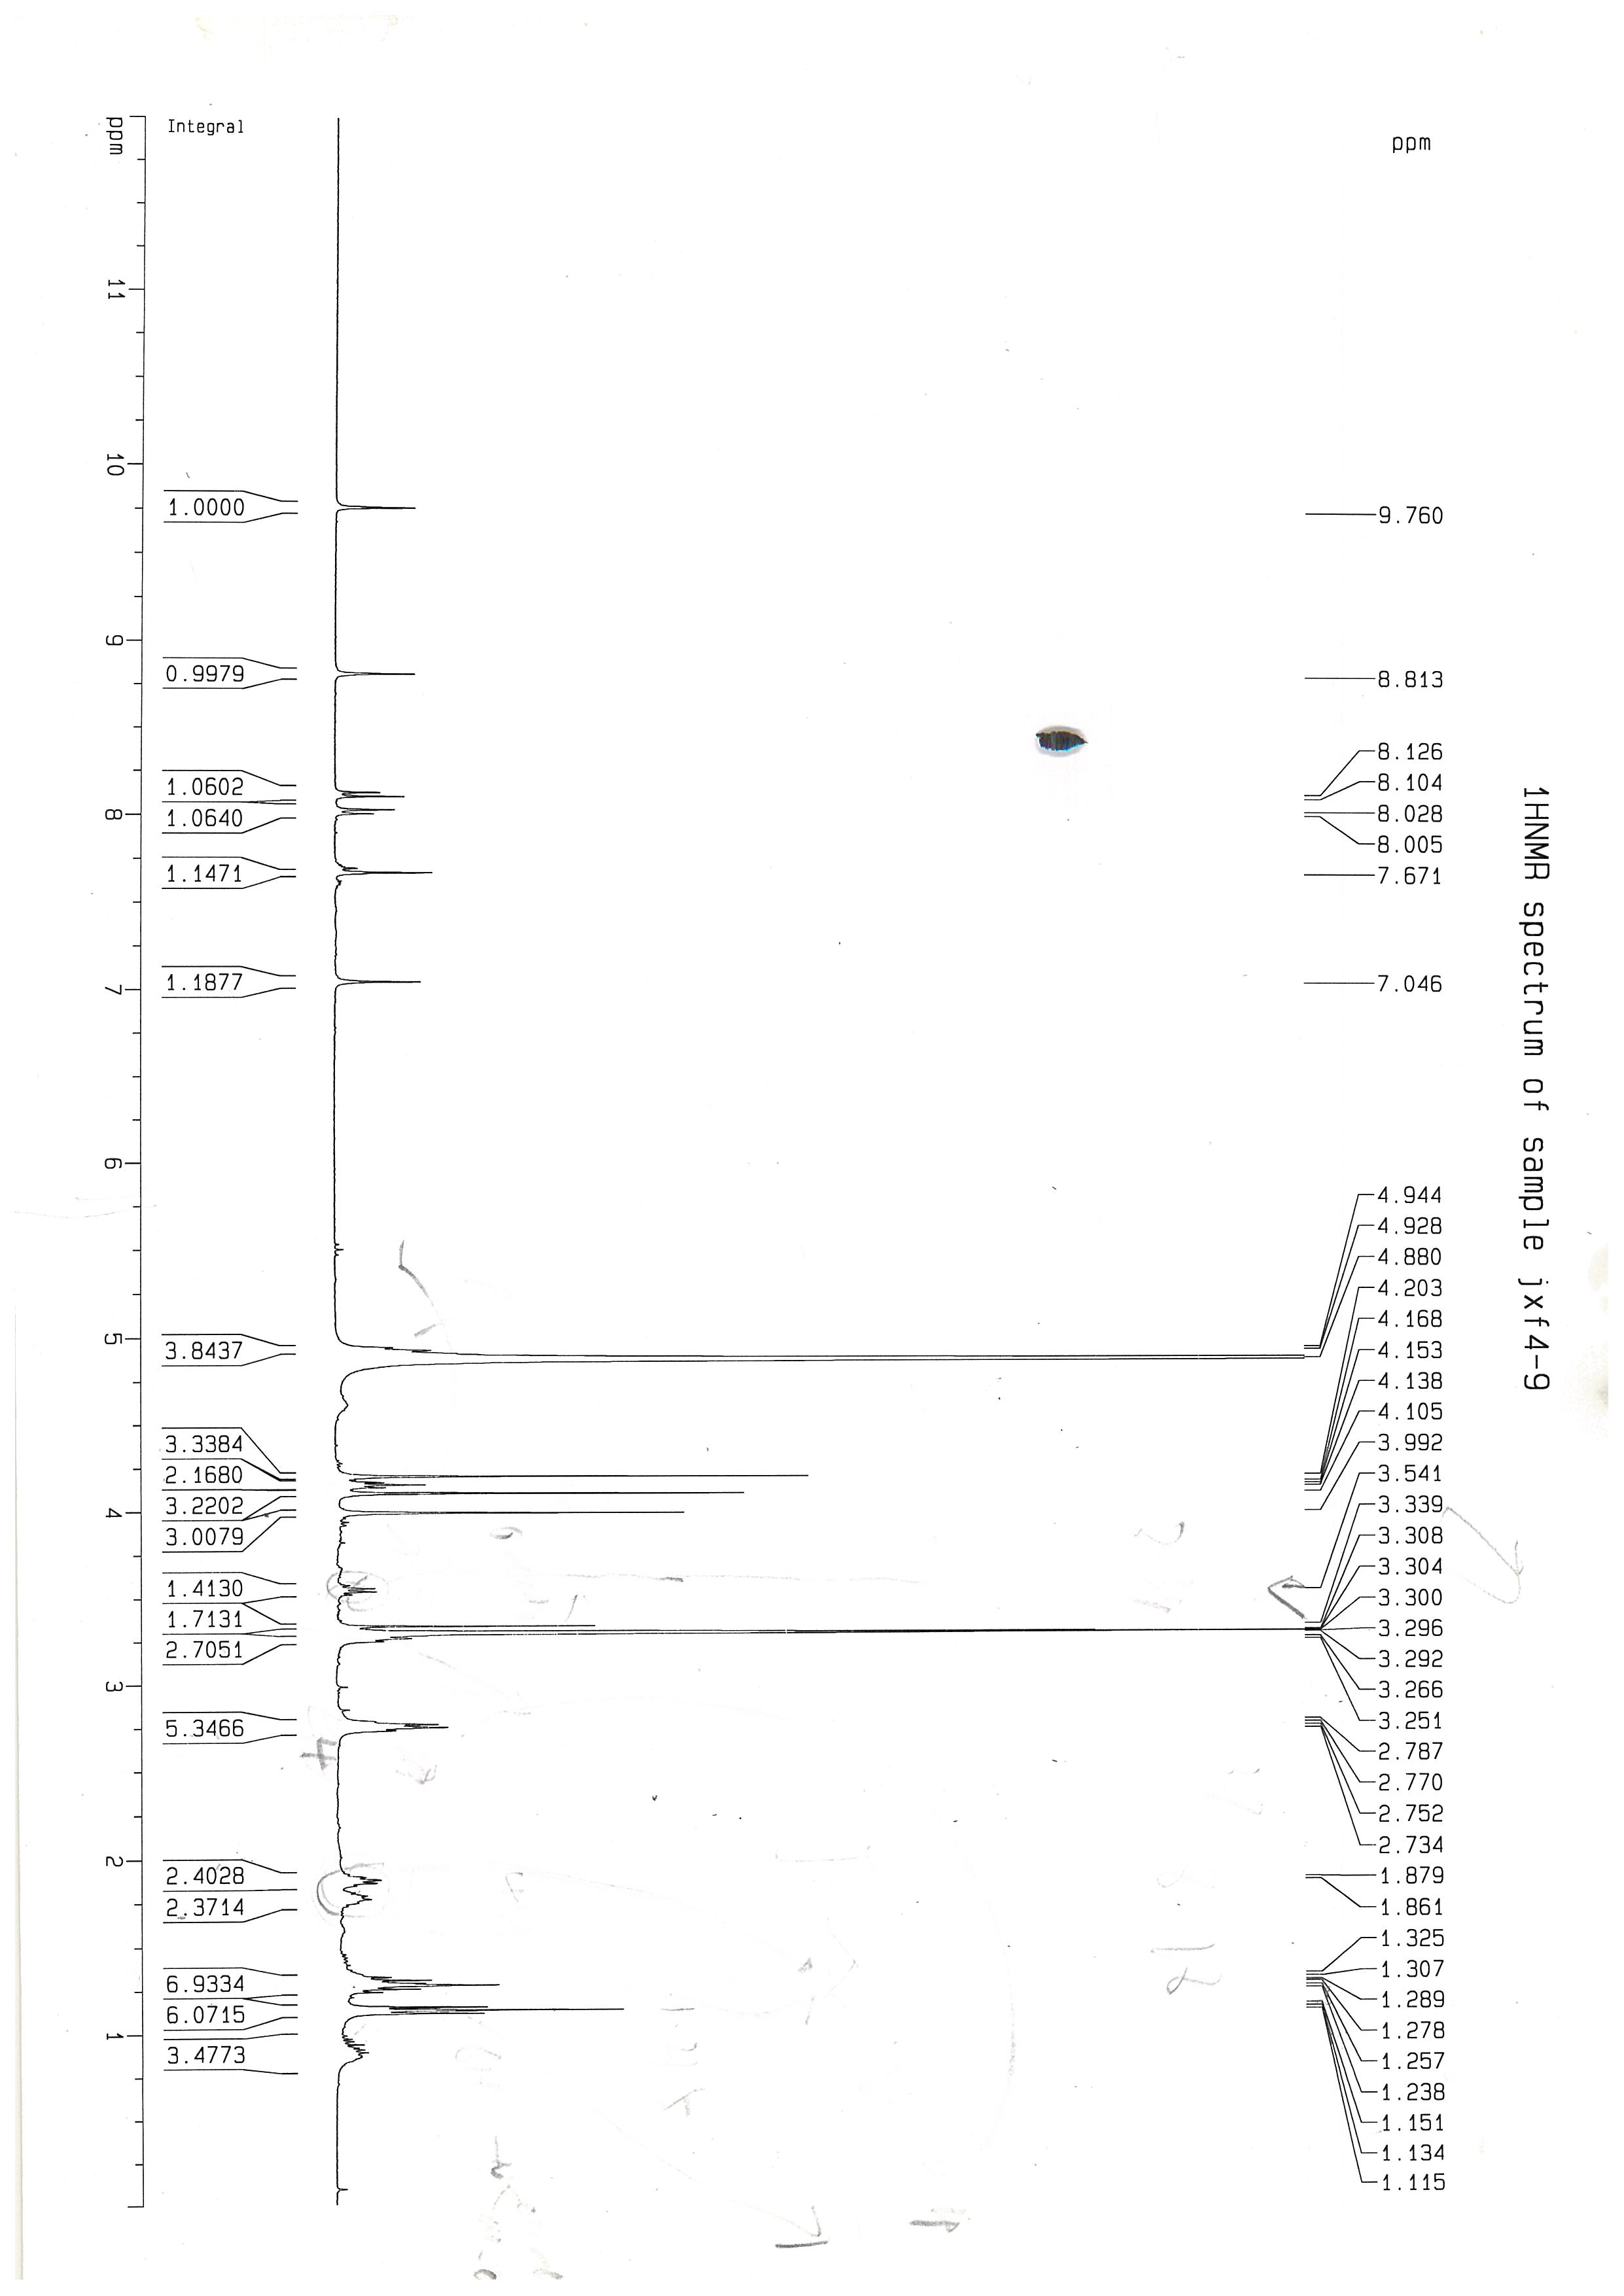

Supplement: f1 [file 3261520.f1.zip › 3261520.f1/A spectrogram of compound 3e/1HNMR of compound 3e.jpg]

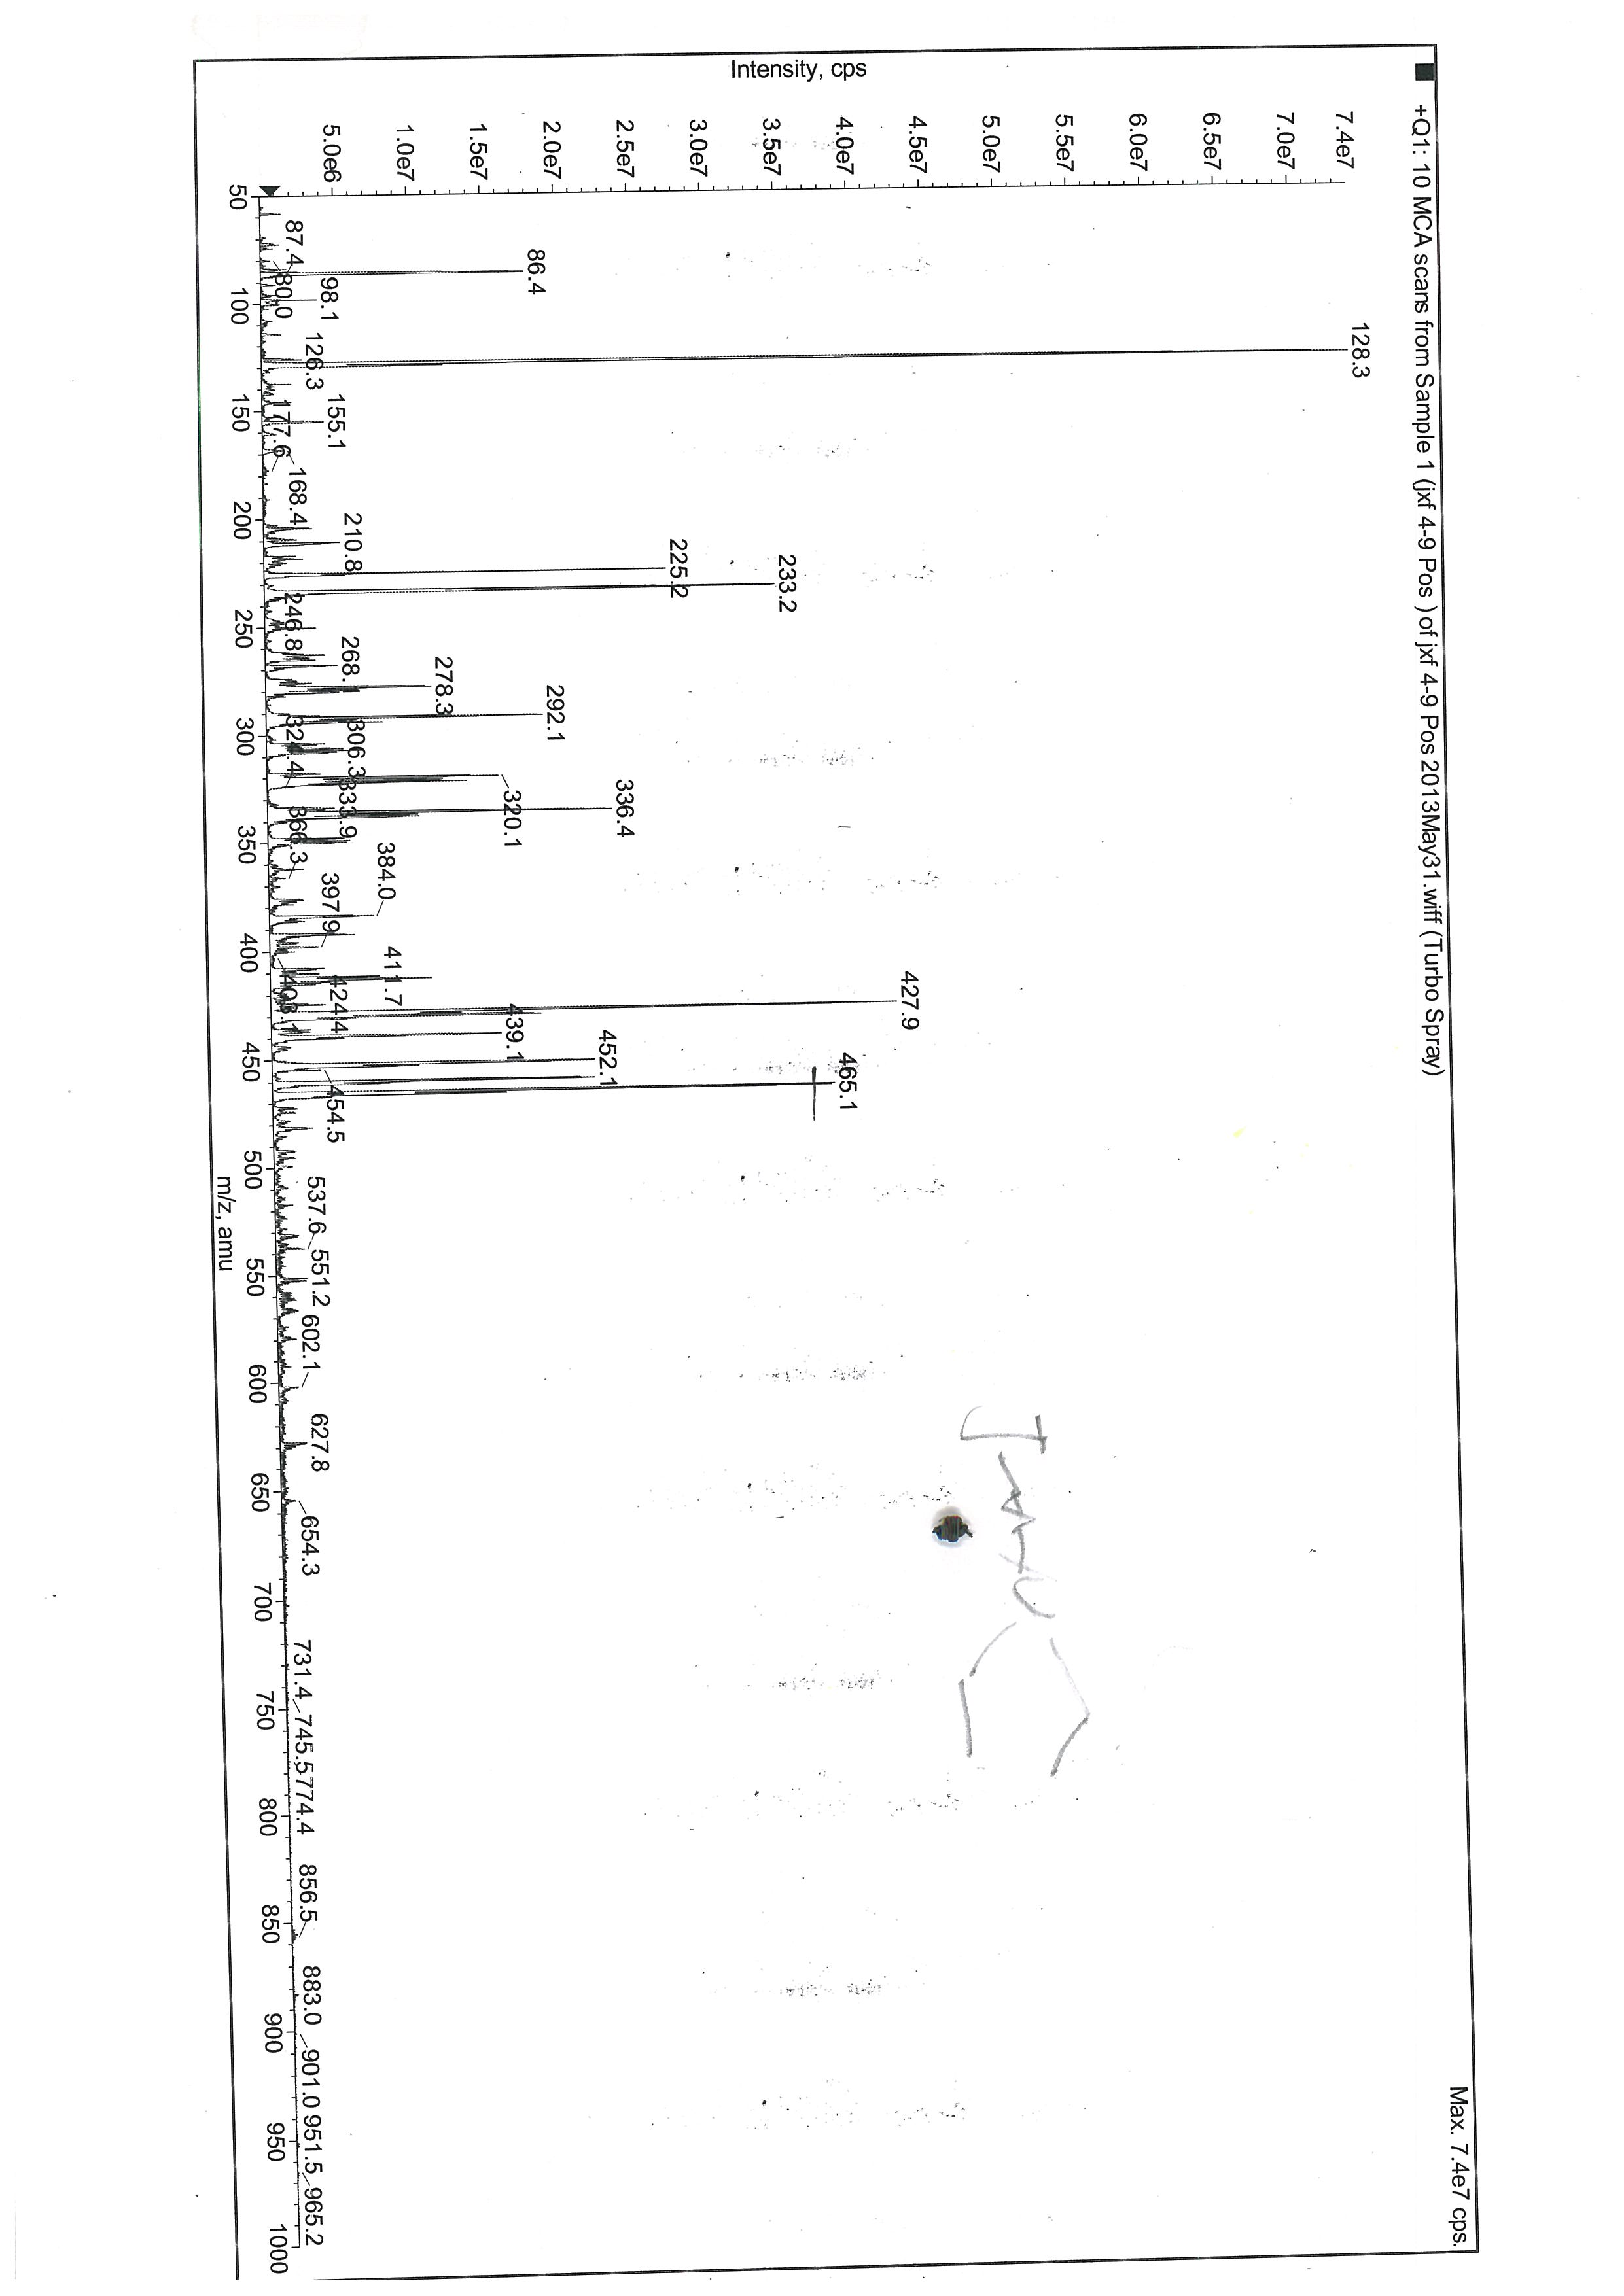

Supplement: f1 [file 3261520.f1.zip › 3261520.f1/A spectrogram of compound 3e/mass spectrogram of compound 3e.jpg]

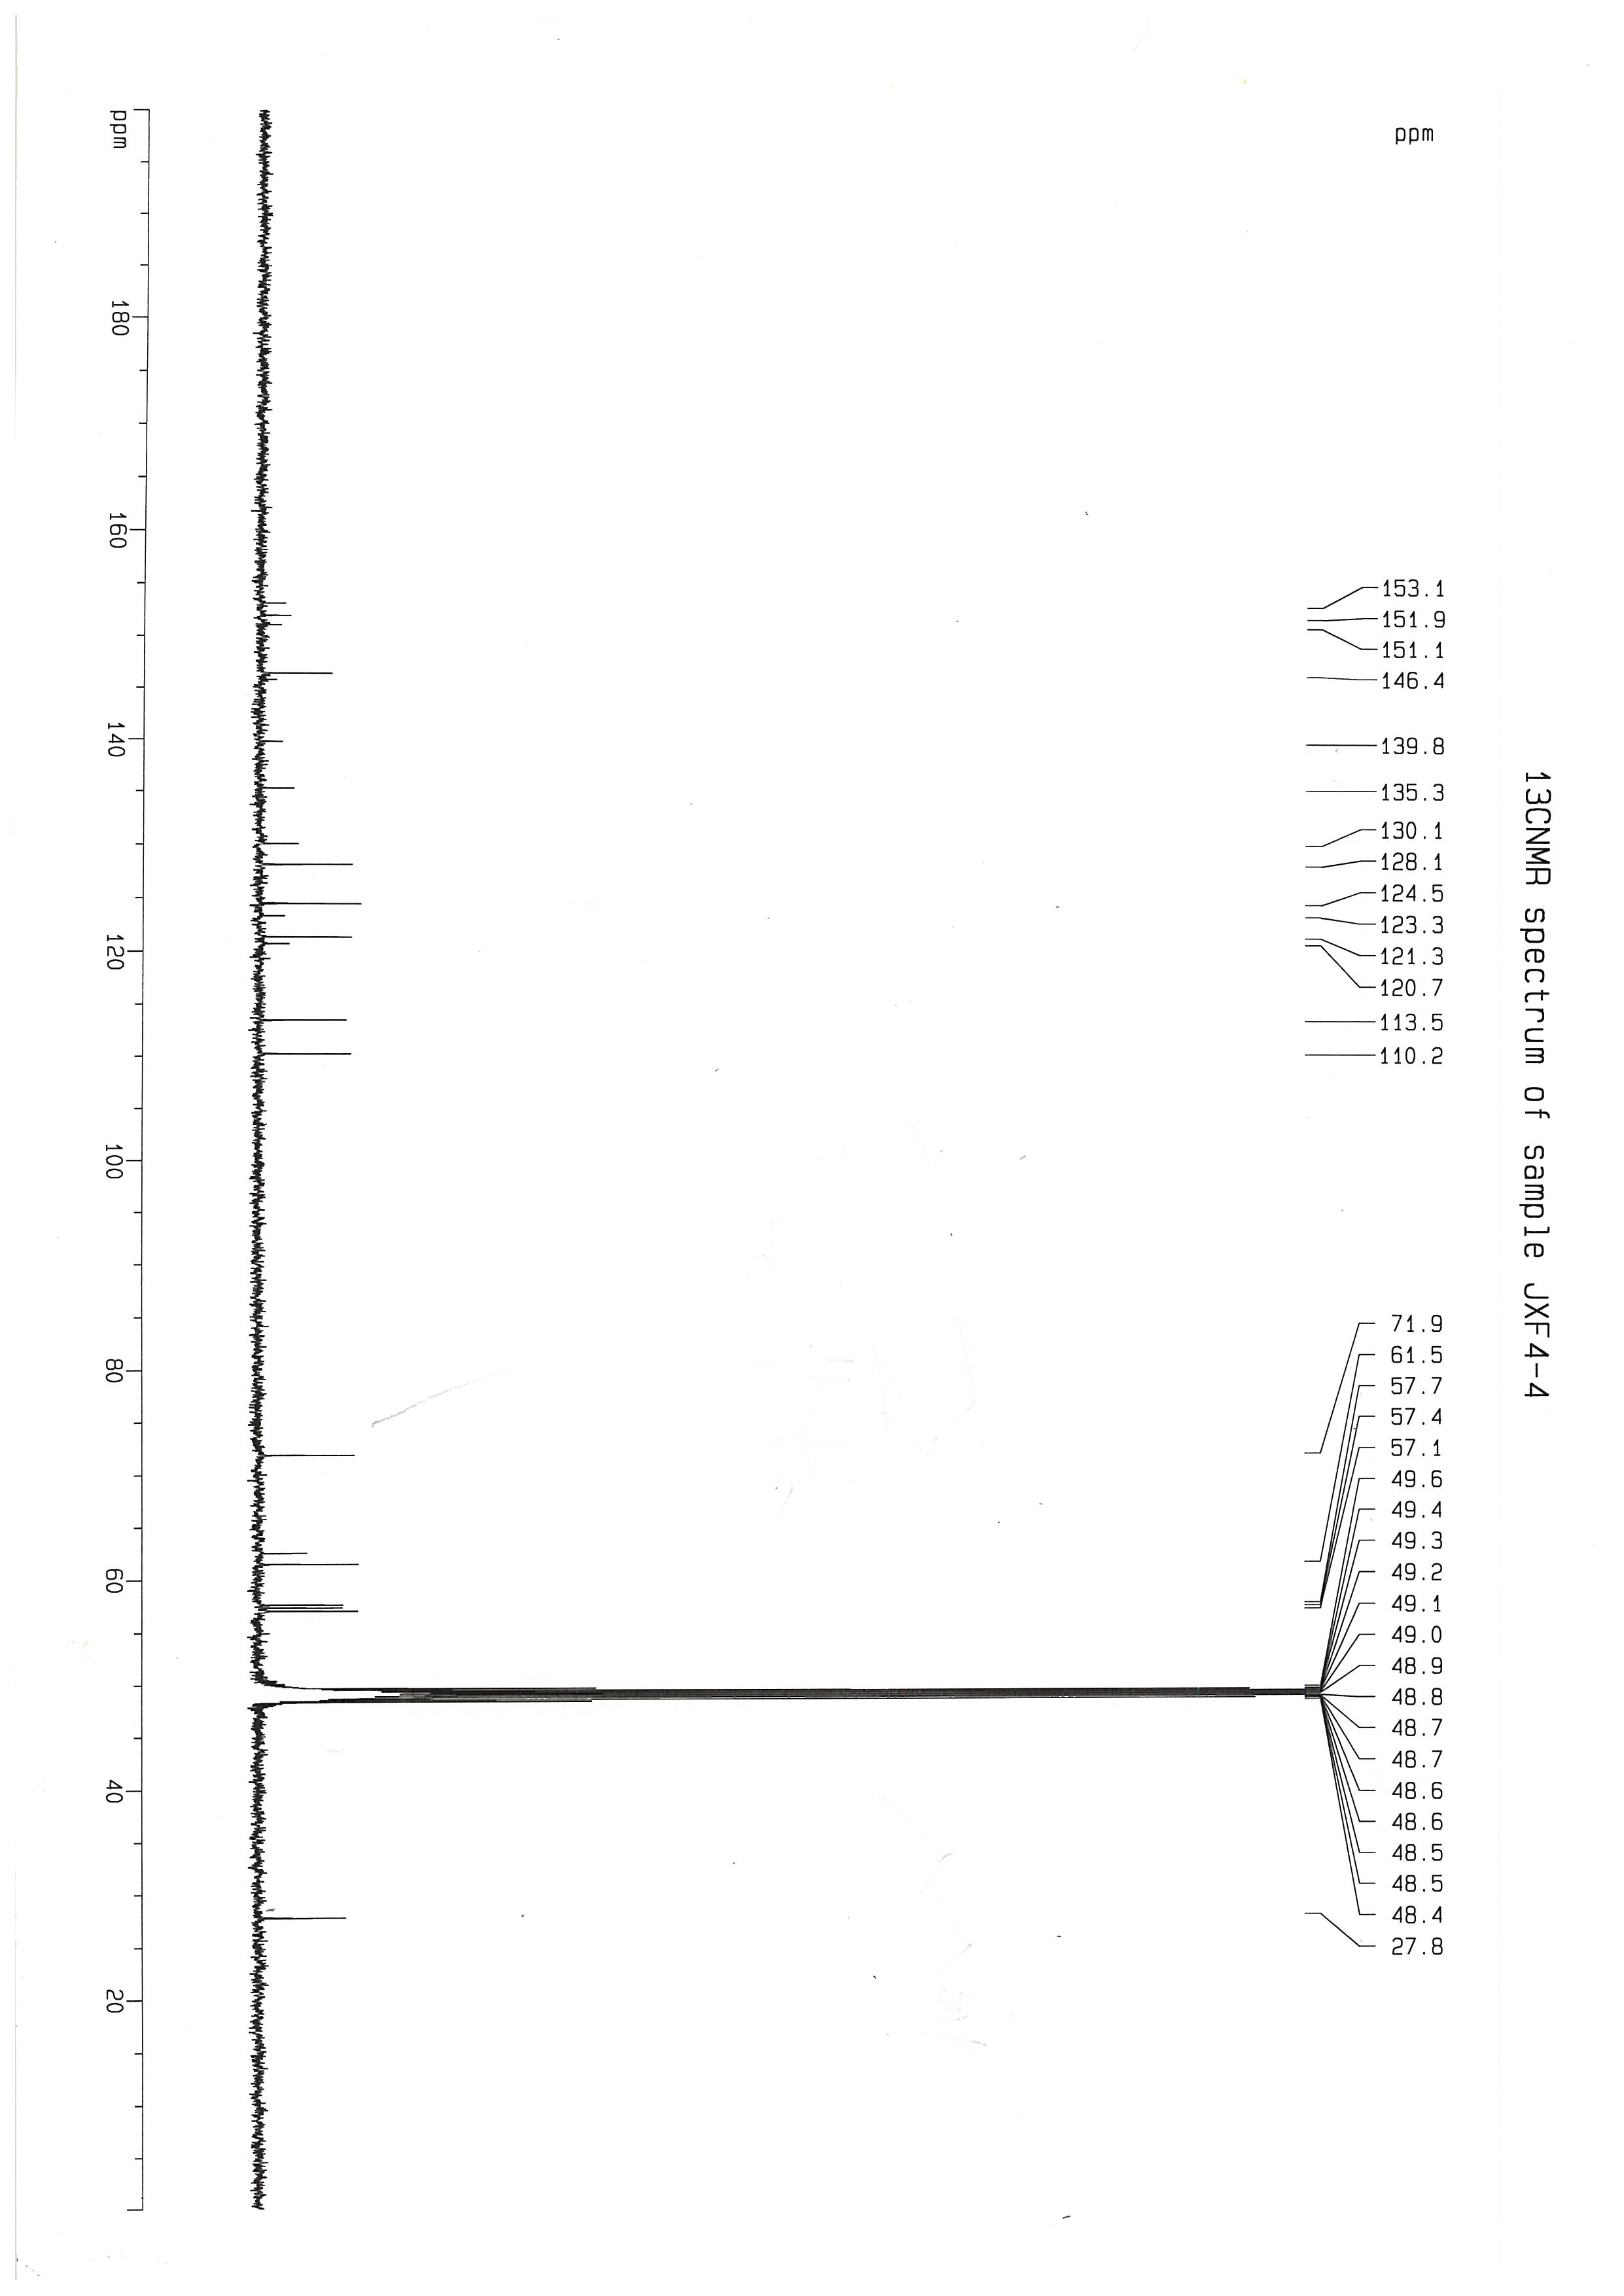

Supplement: f1 [file 3261520.f1.zip › 3261520.f1/A spectrogram of compound 3f/13CNMR of compound 3f.jpg]

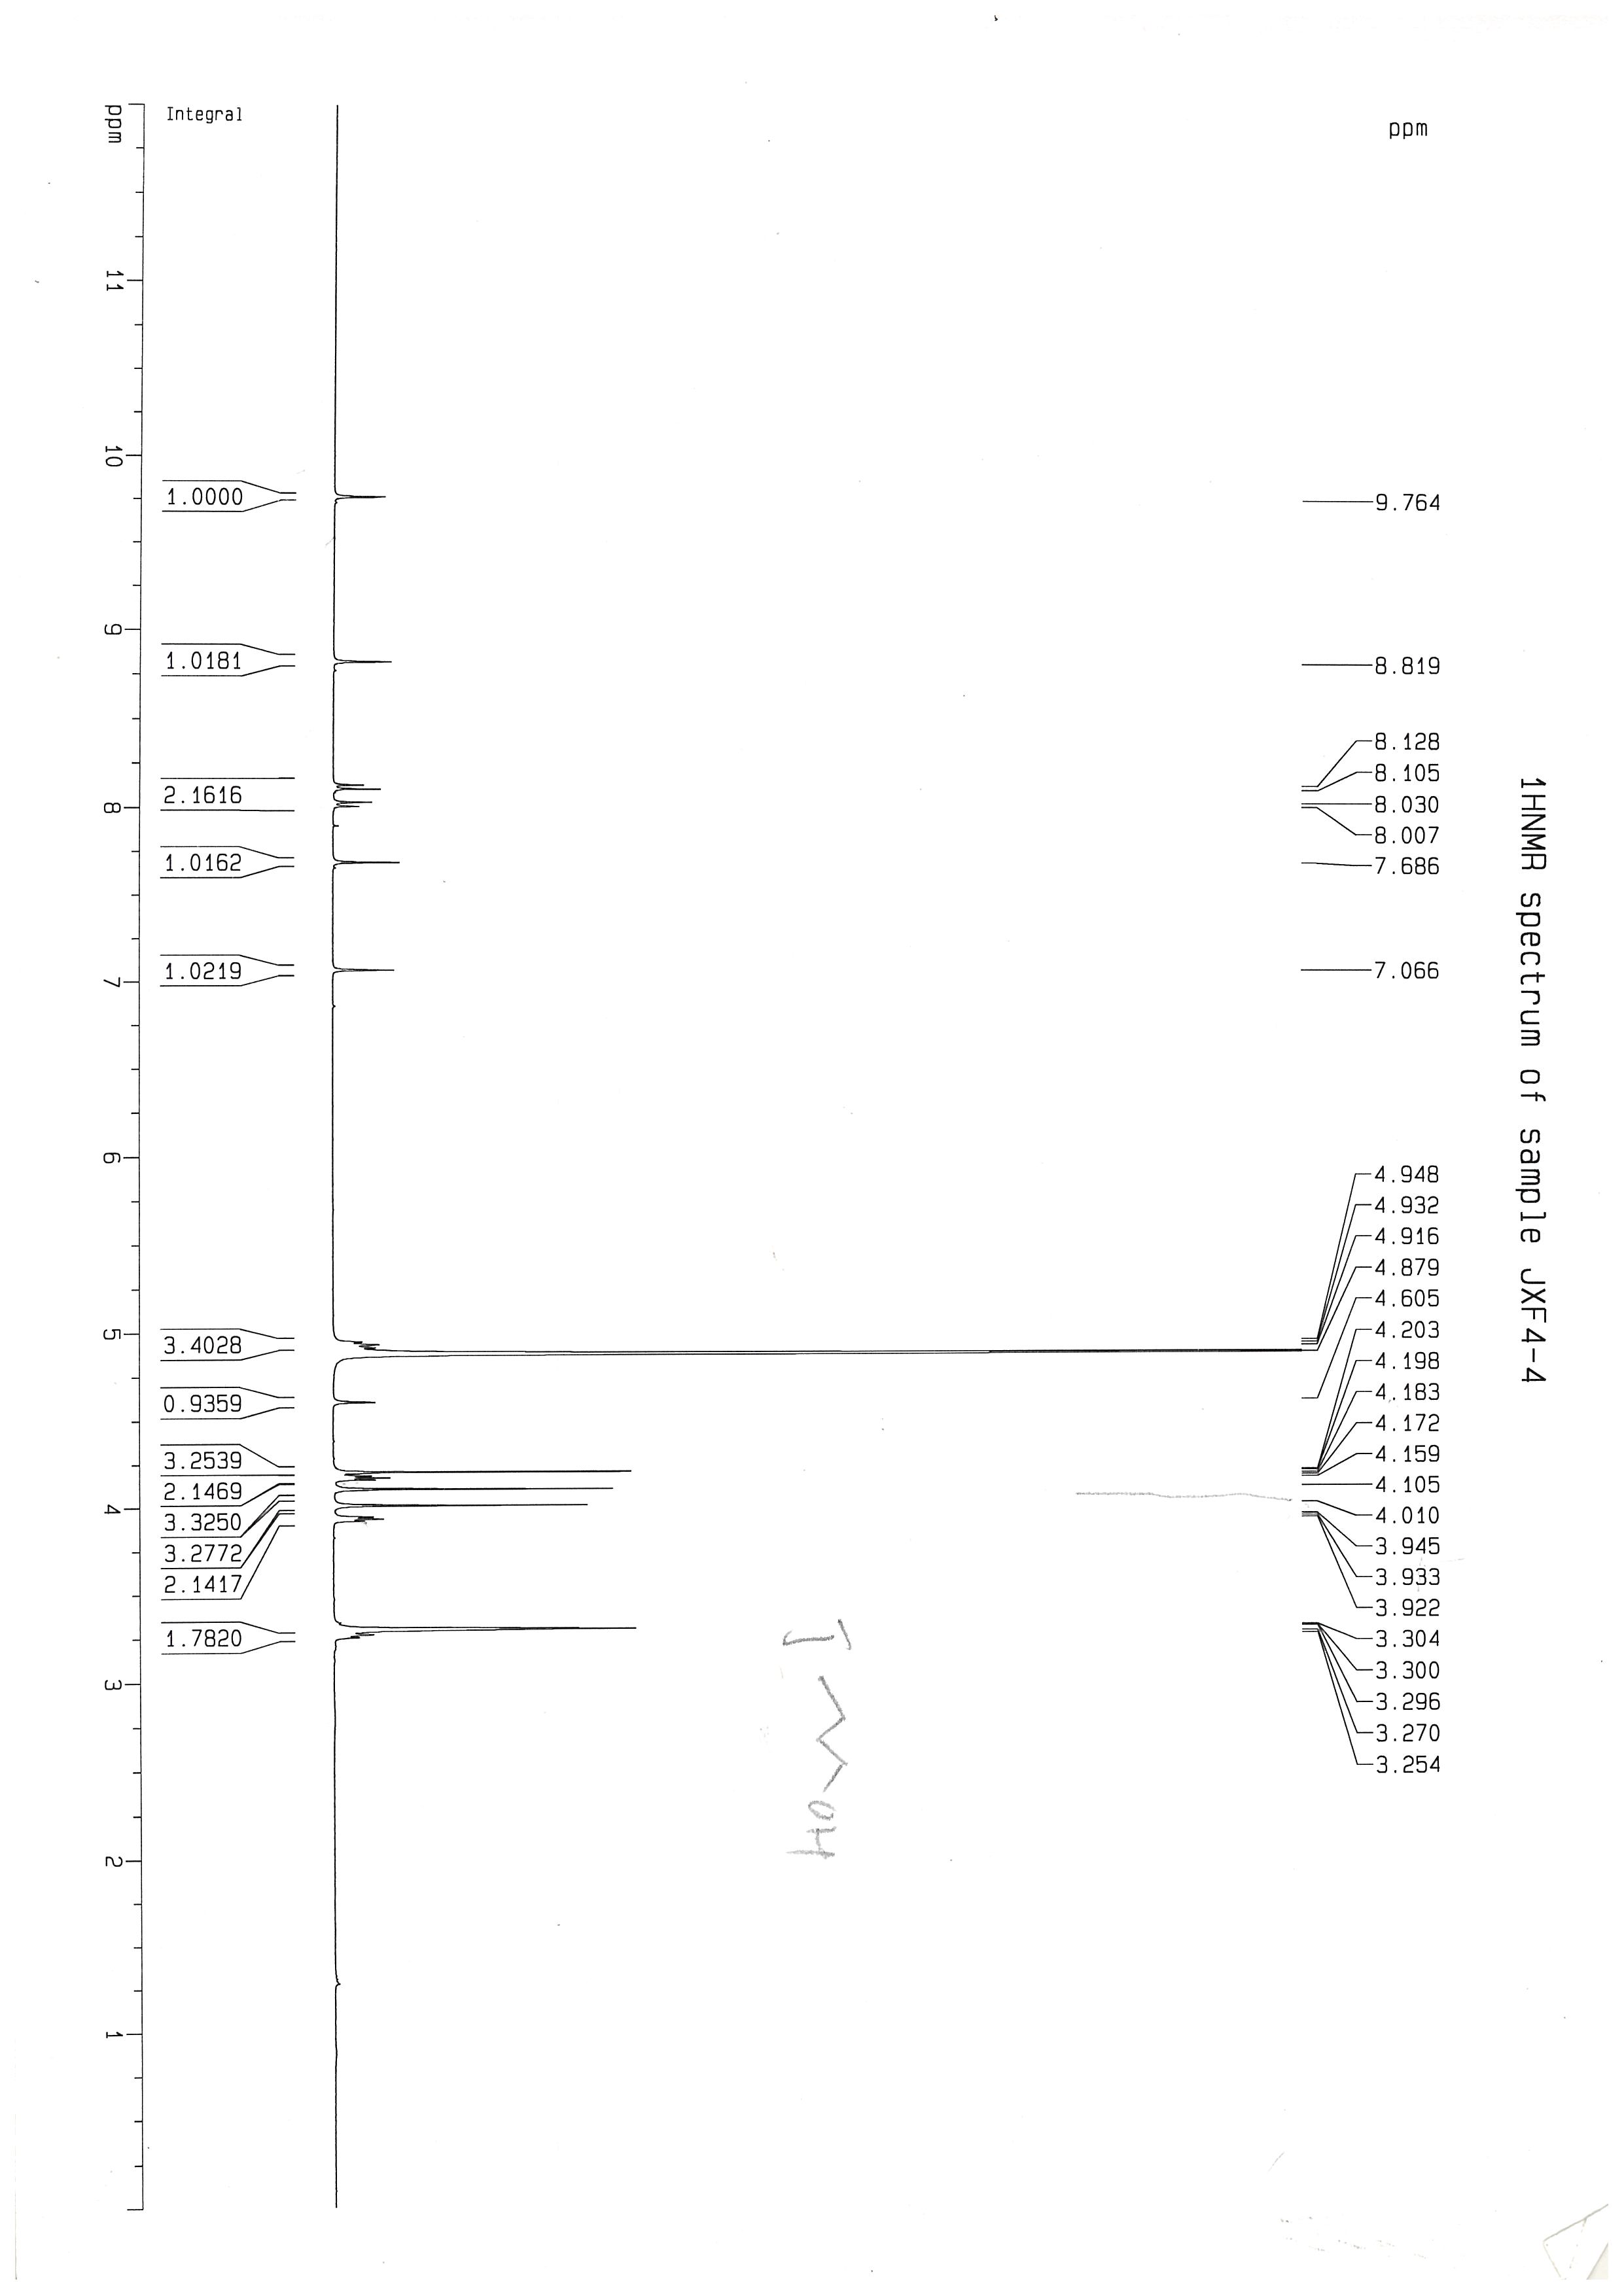

Supplement: f1 [file 3261520.f1.zip › 3261520.f1/A spectrogram of compound 3f/1HNMR of compound 3f.jpg]

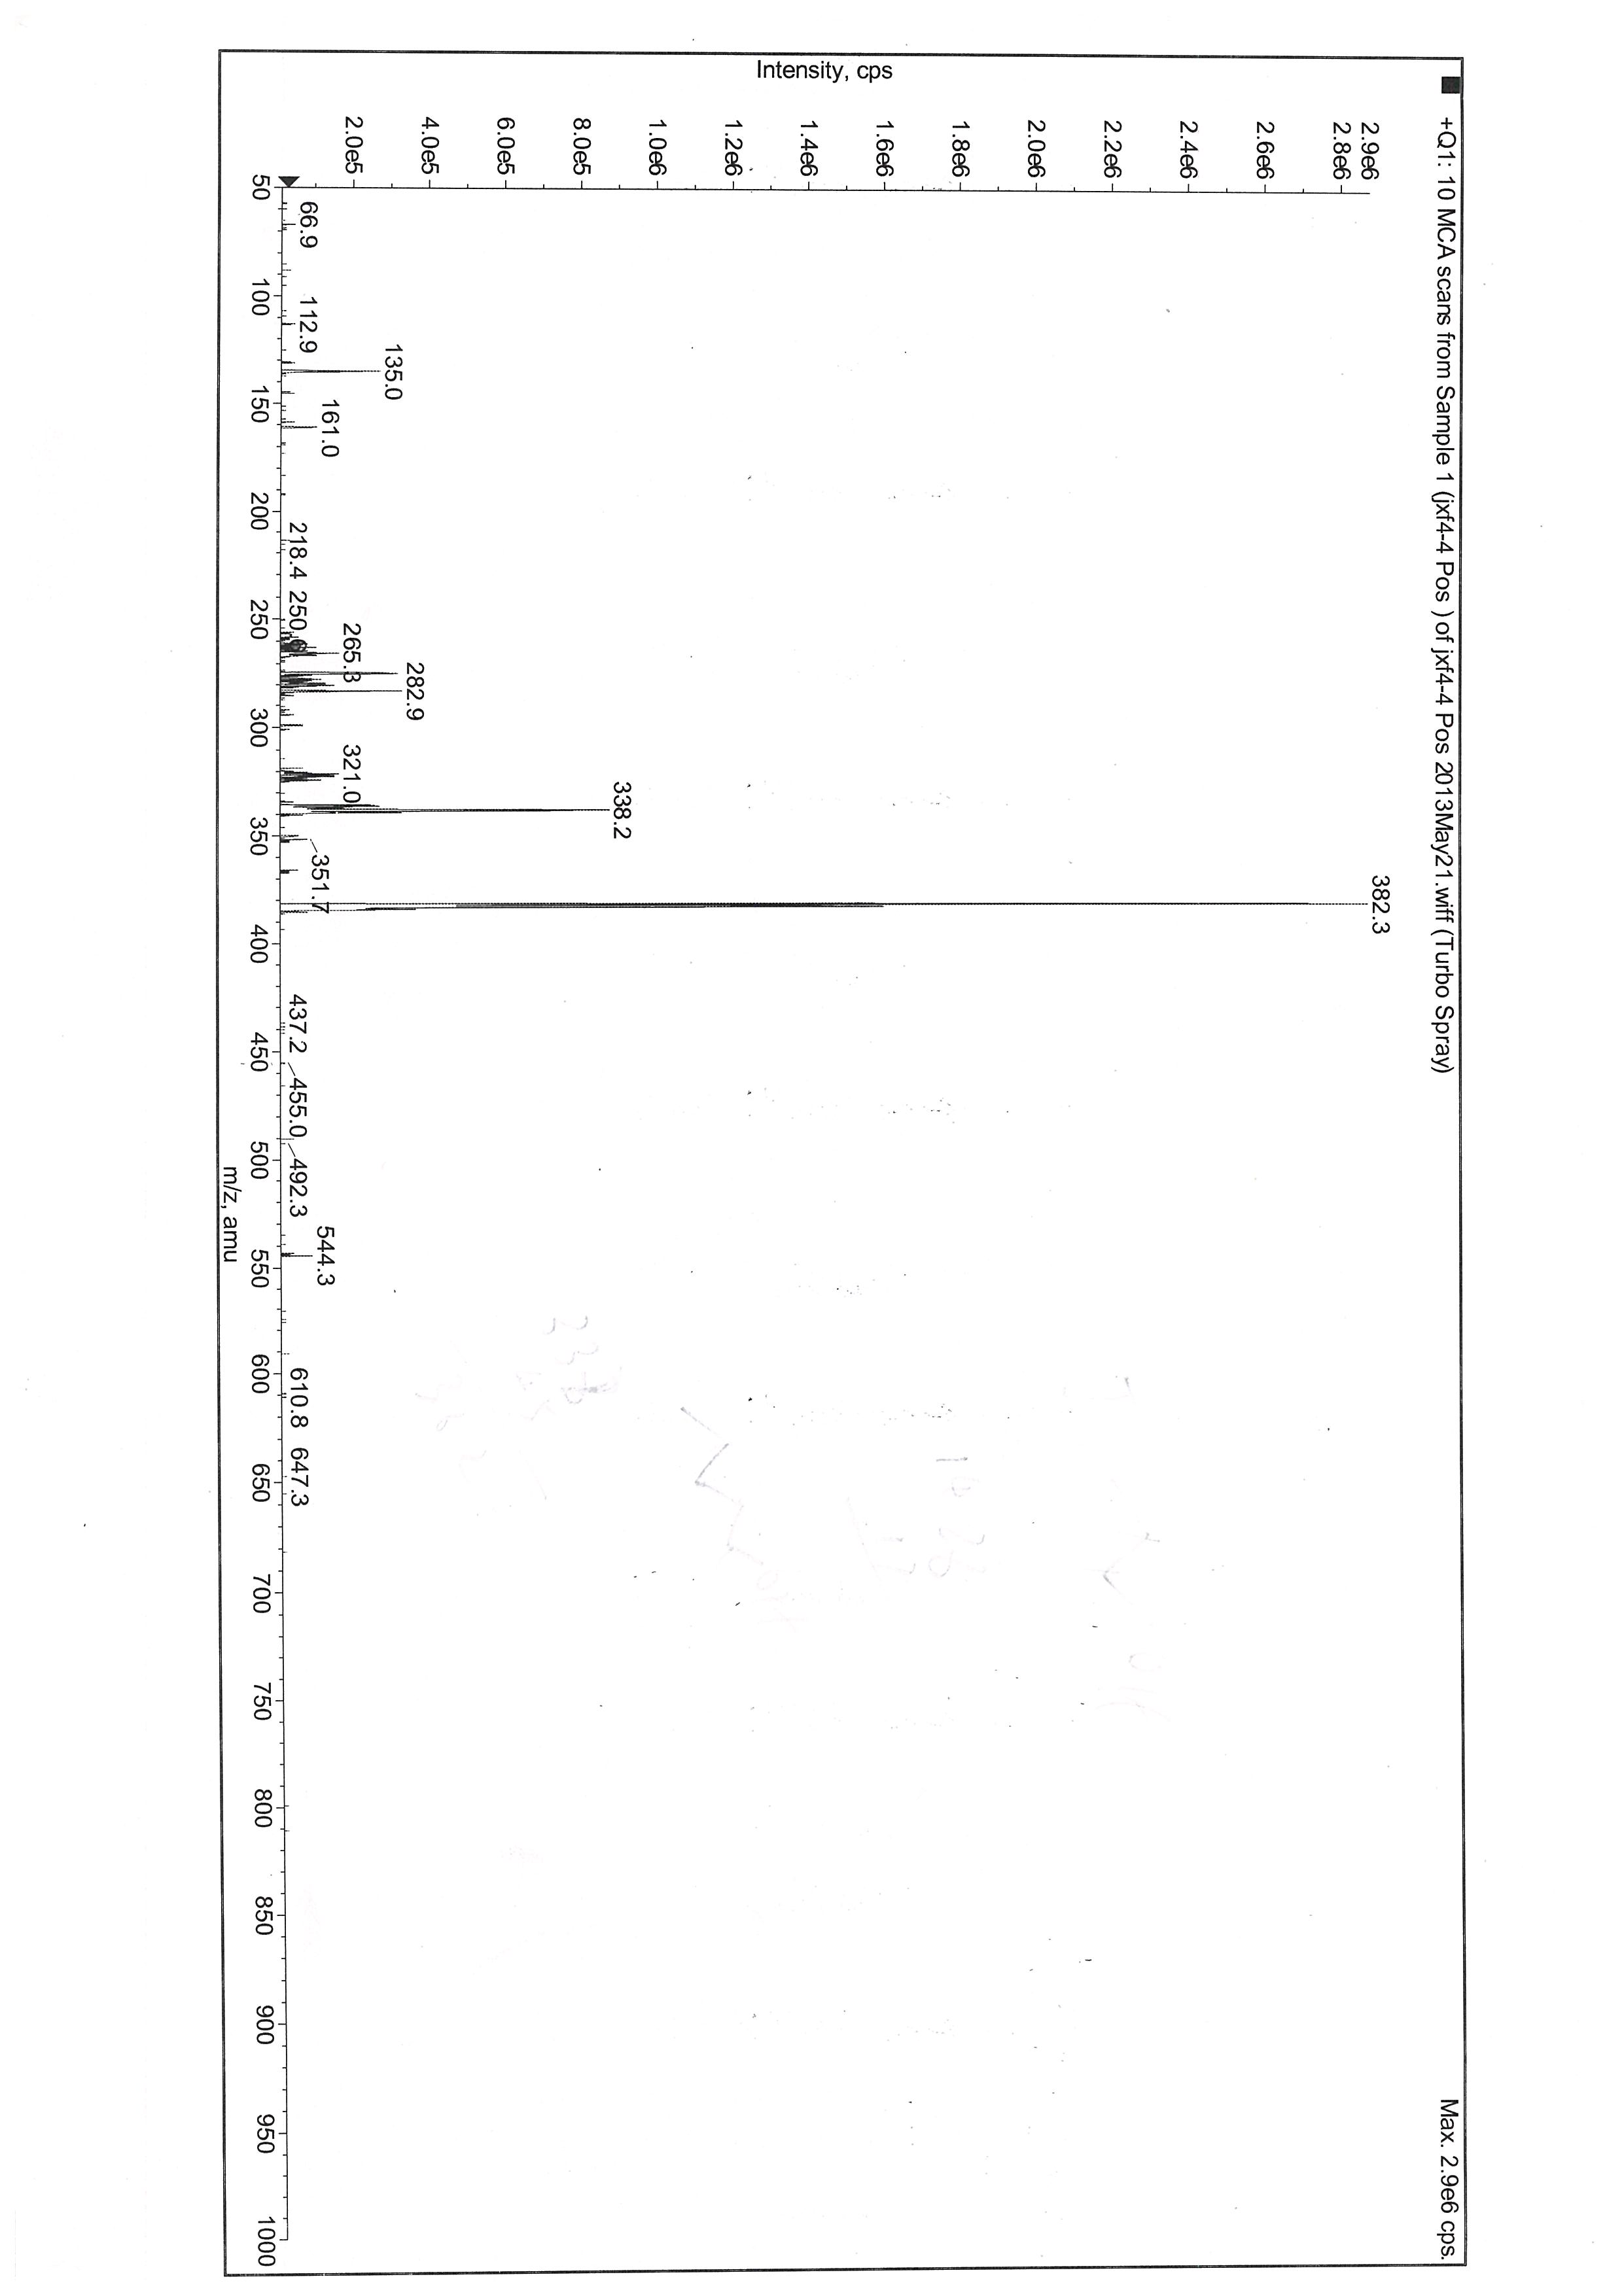

Supplement: f1 [file 3261520.f1.zip › 3261520.f1/A spectrogram of compound 3f/mass spectrogram of compound 3f.jpg]

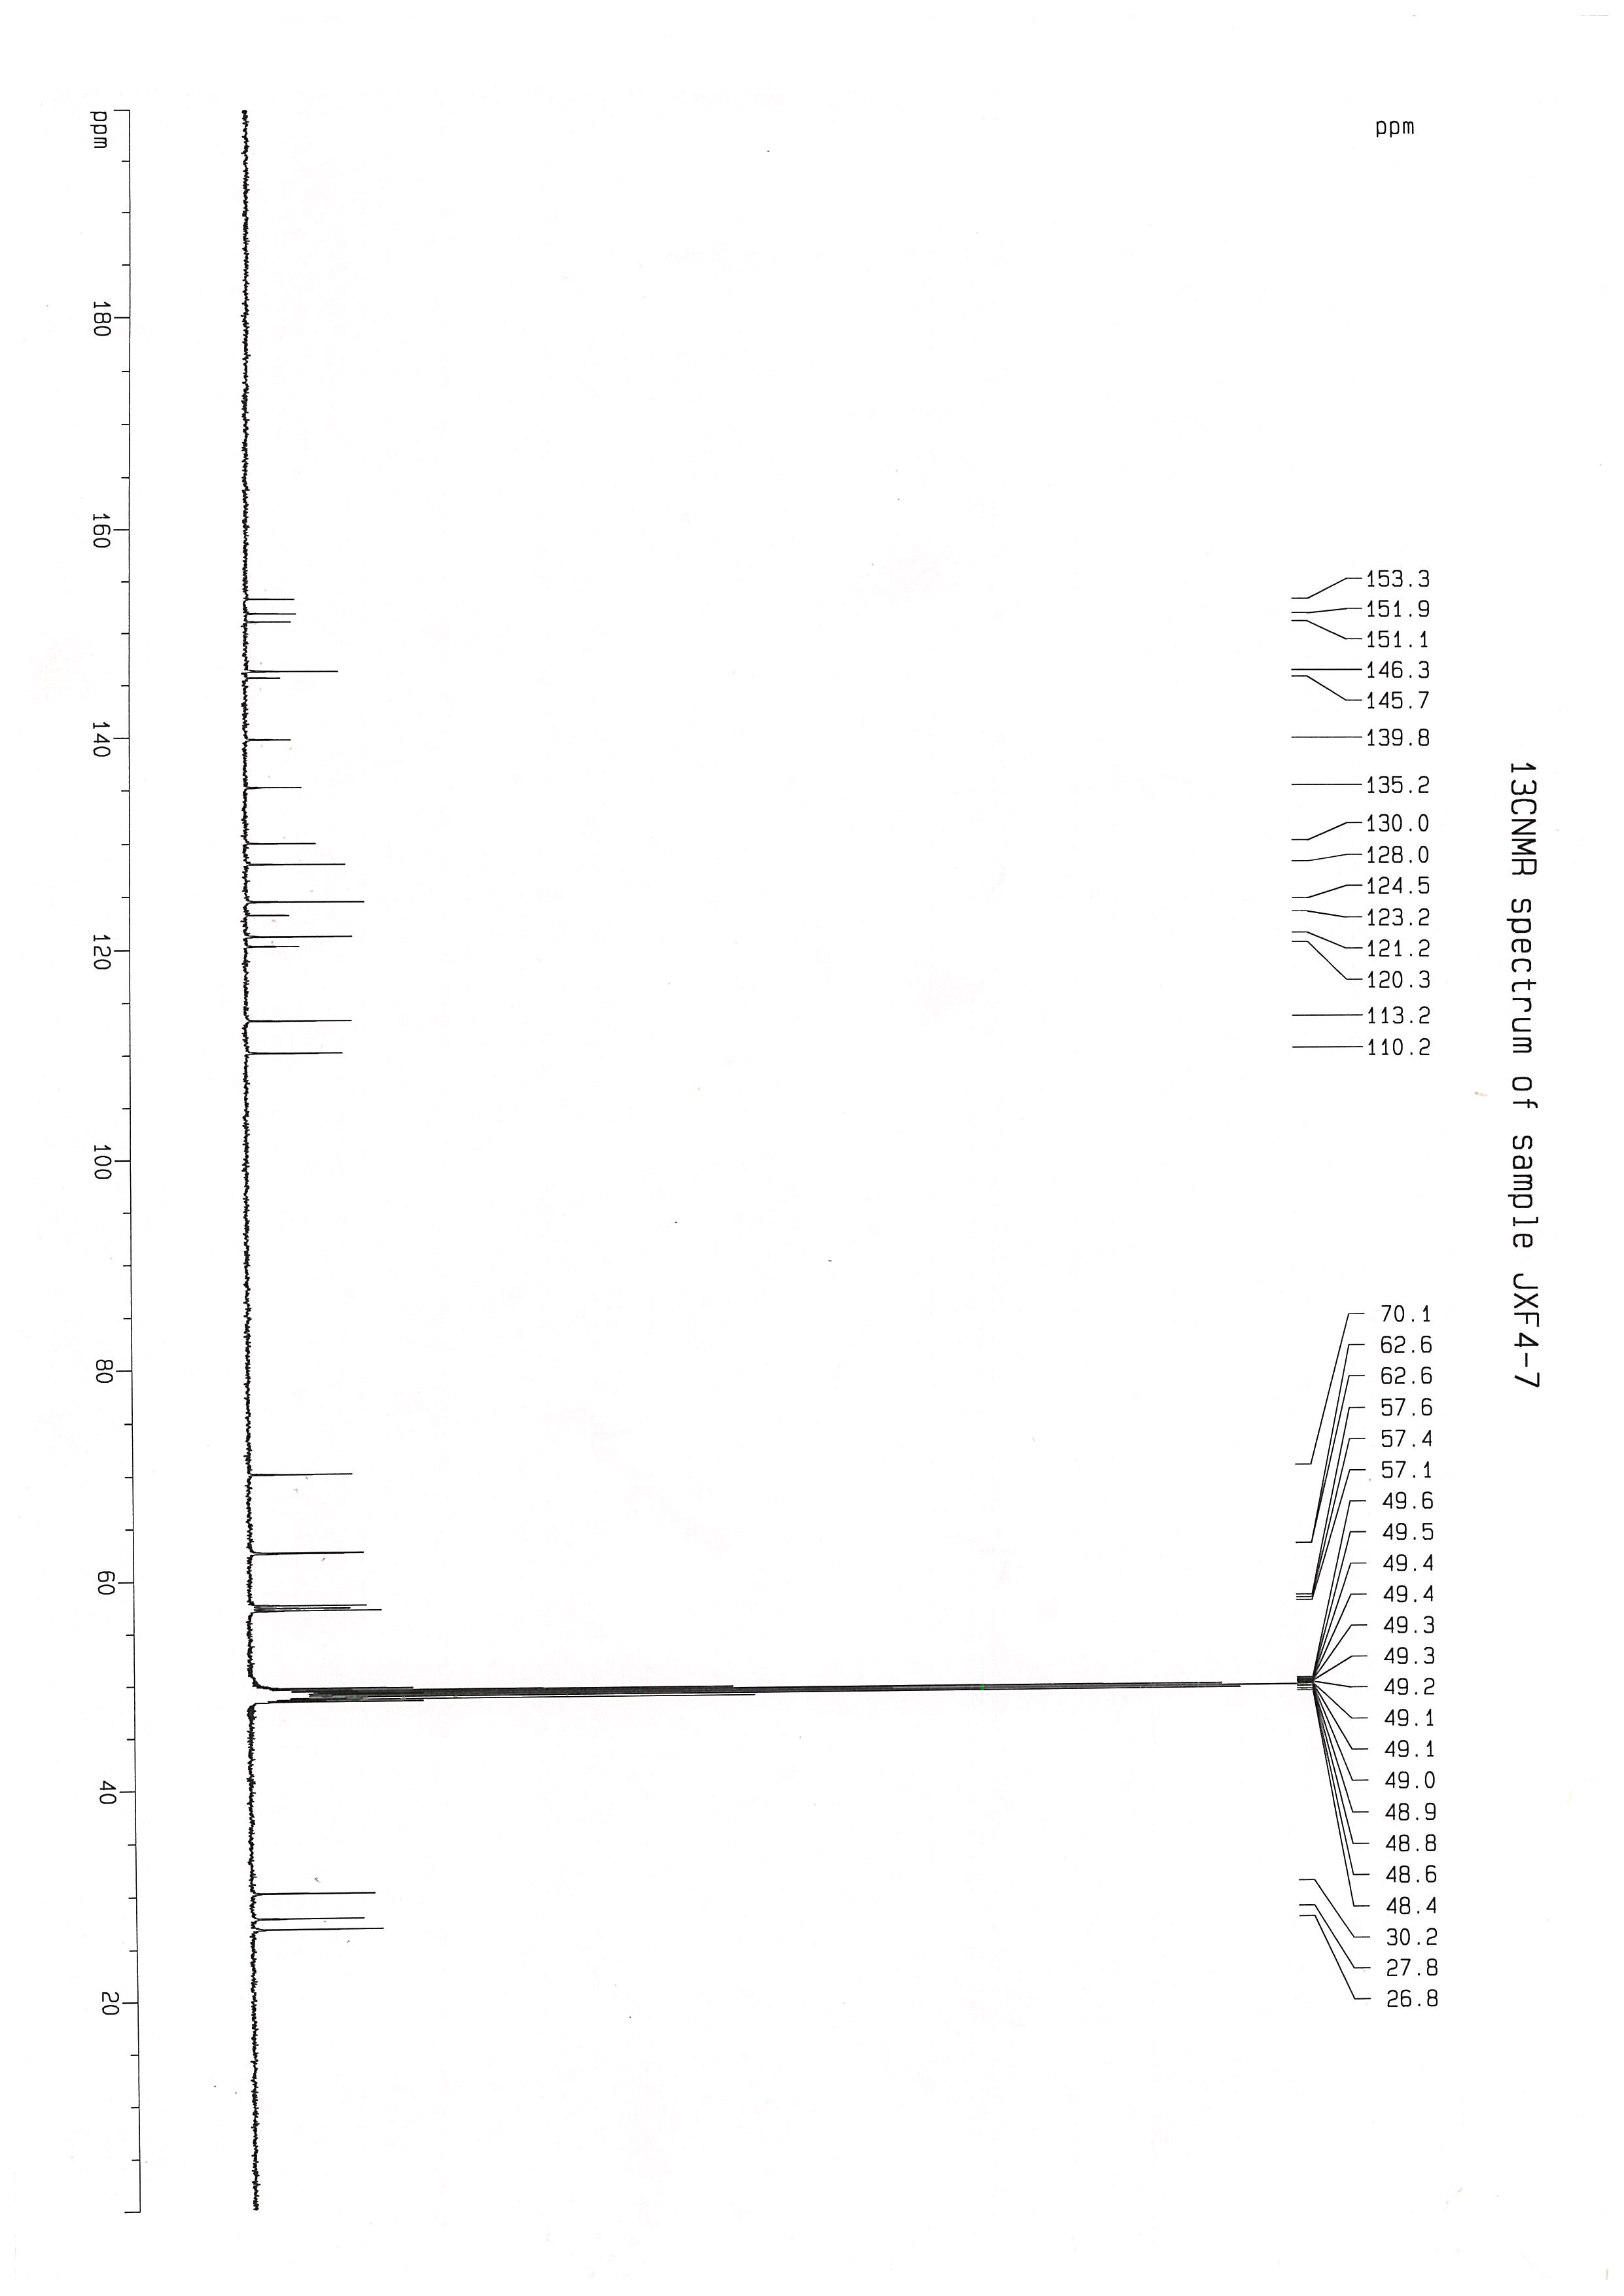

Supplement: f1 [file 3261520.f1.zip › 3261520.f1/A spectrogram of compound 3g/13CNMR of compound 3g.jpg]

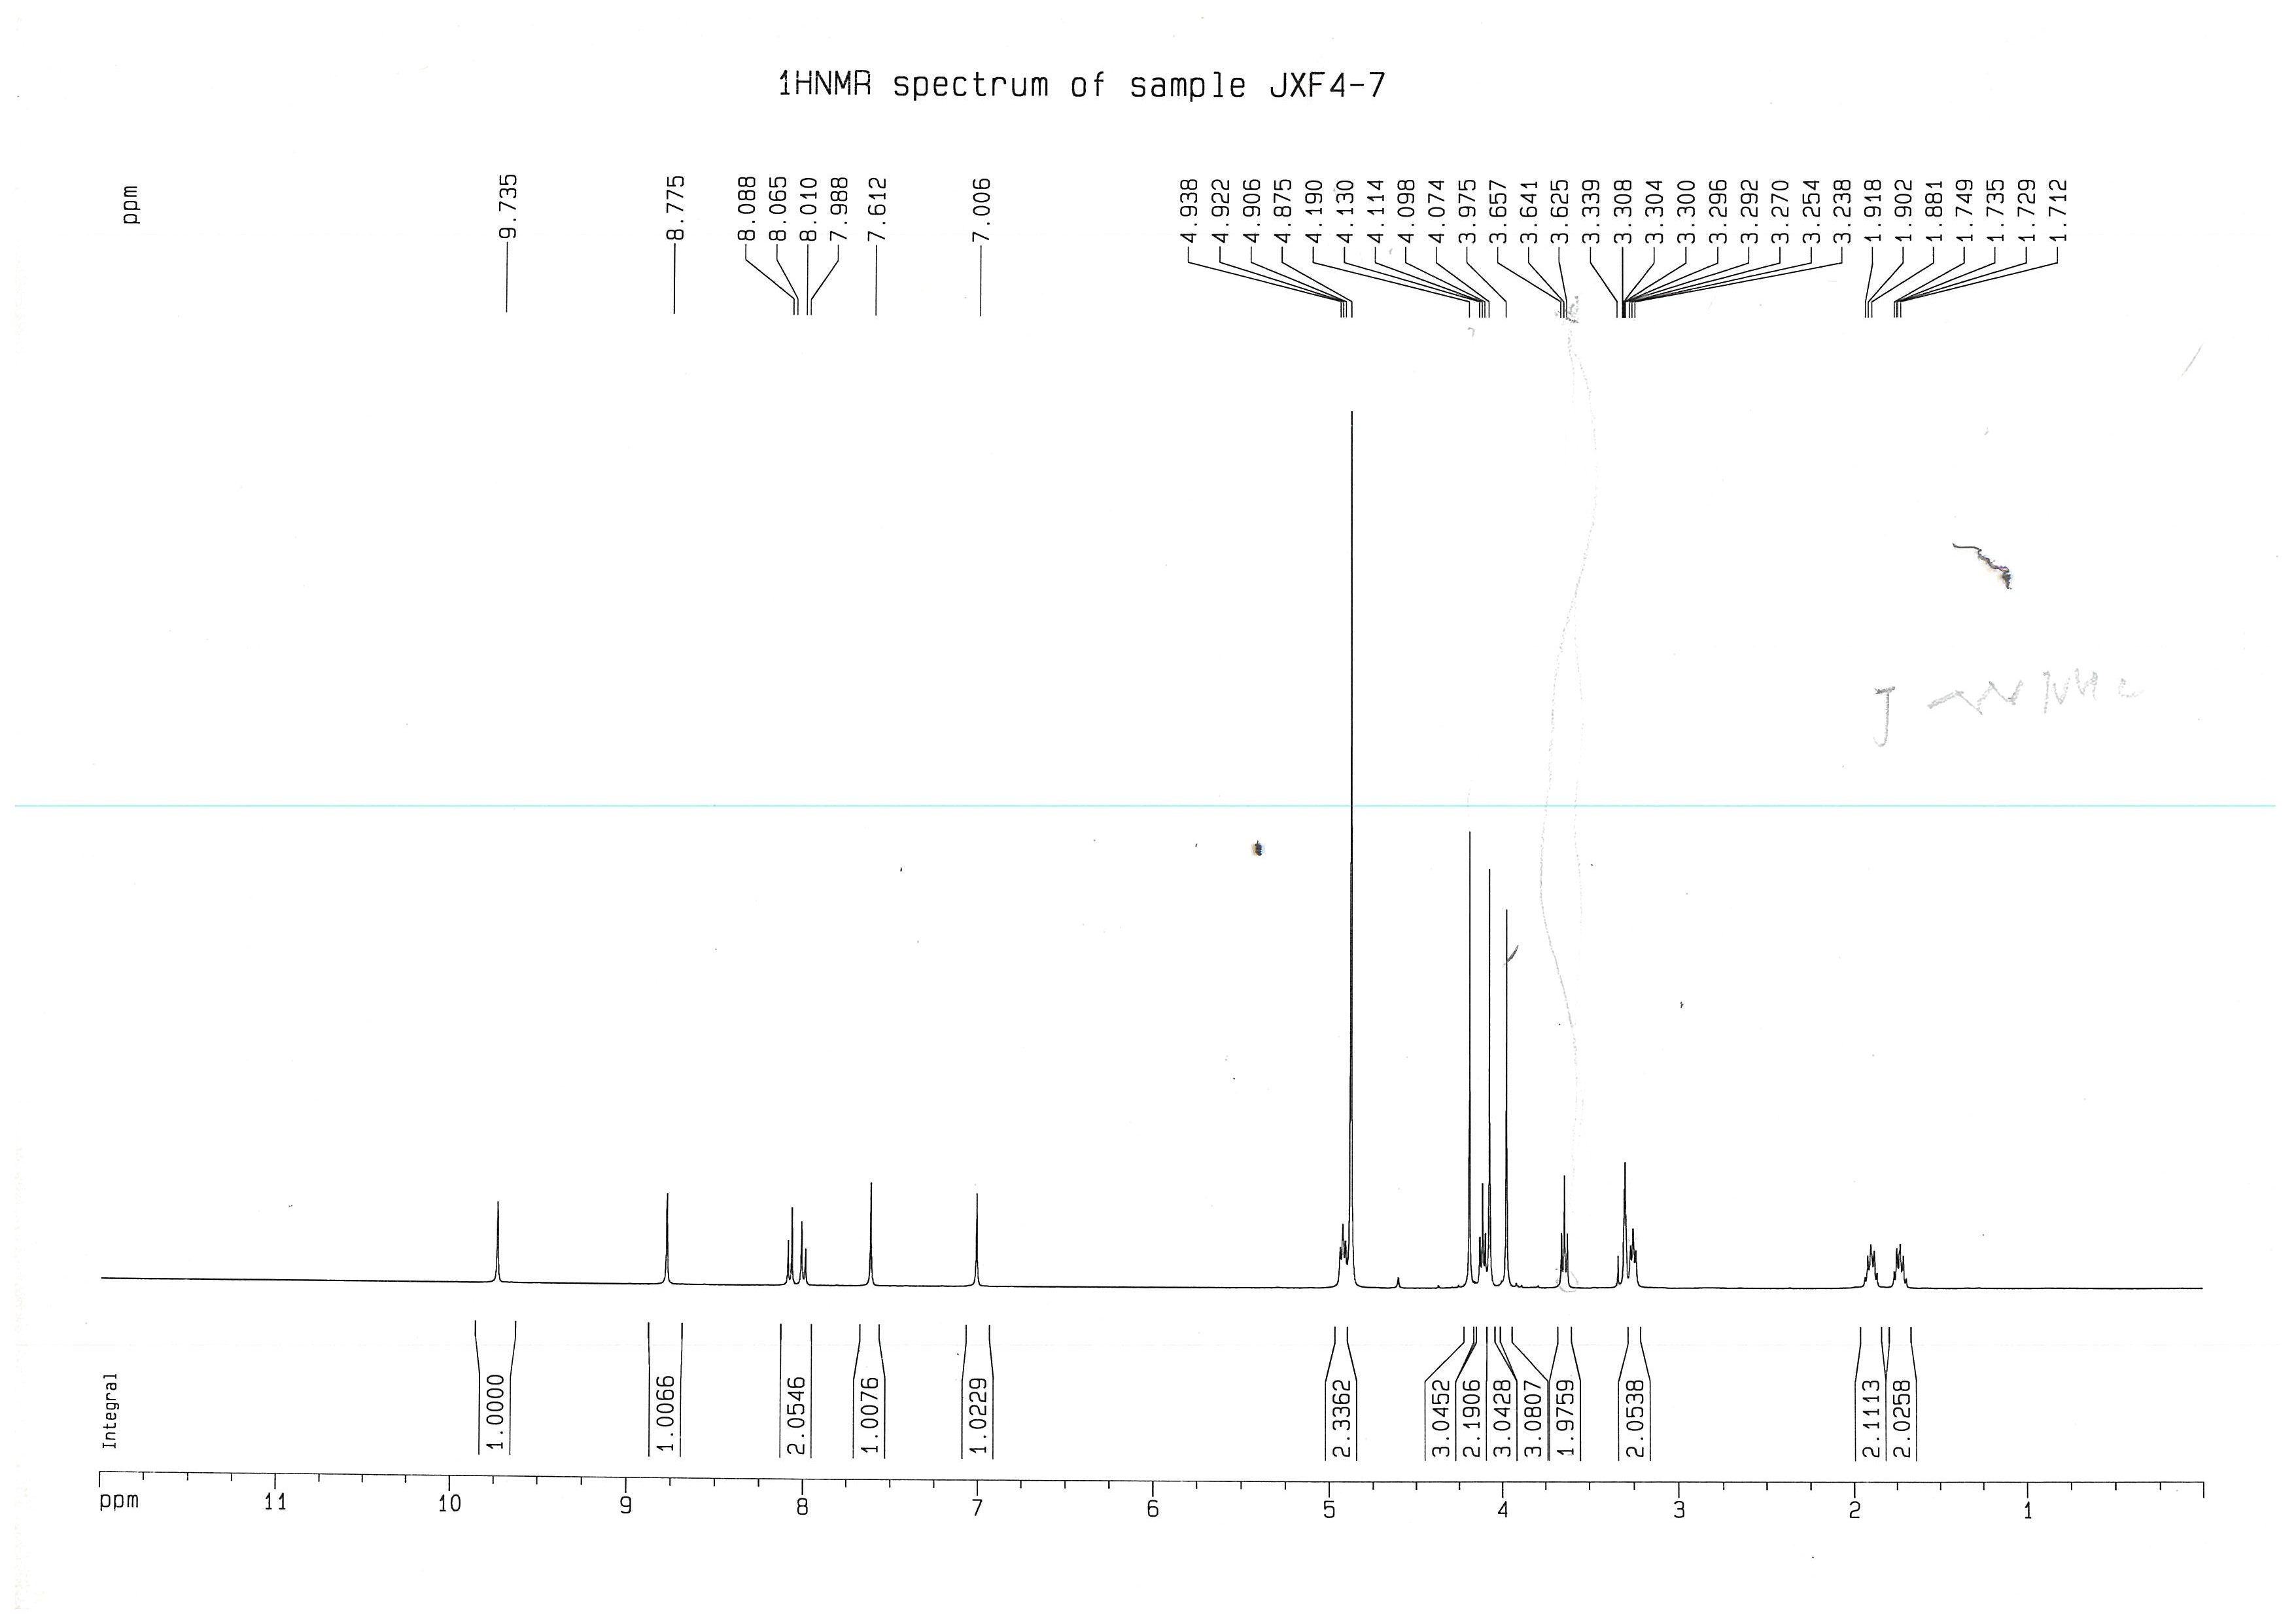

Supplement: f1 [file 3261520.f1.zip › 3261520.f1/A spectrogram of compound 3g/1HNMR of compound 3g.jpg]

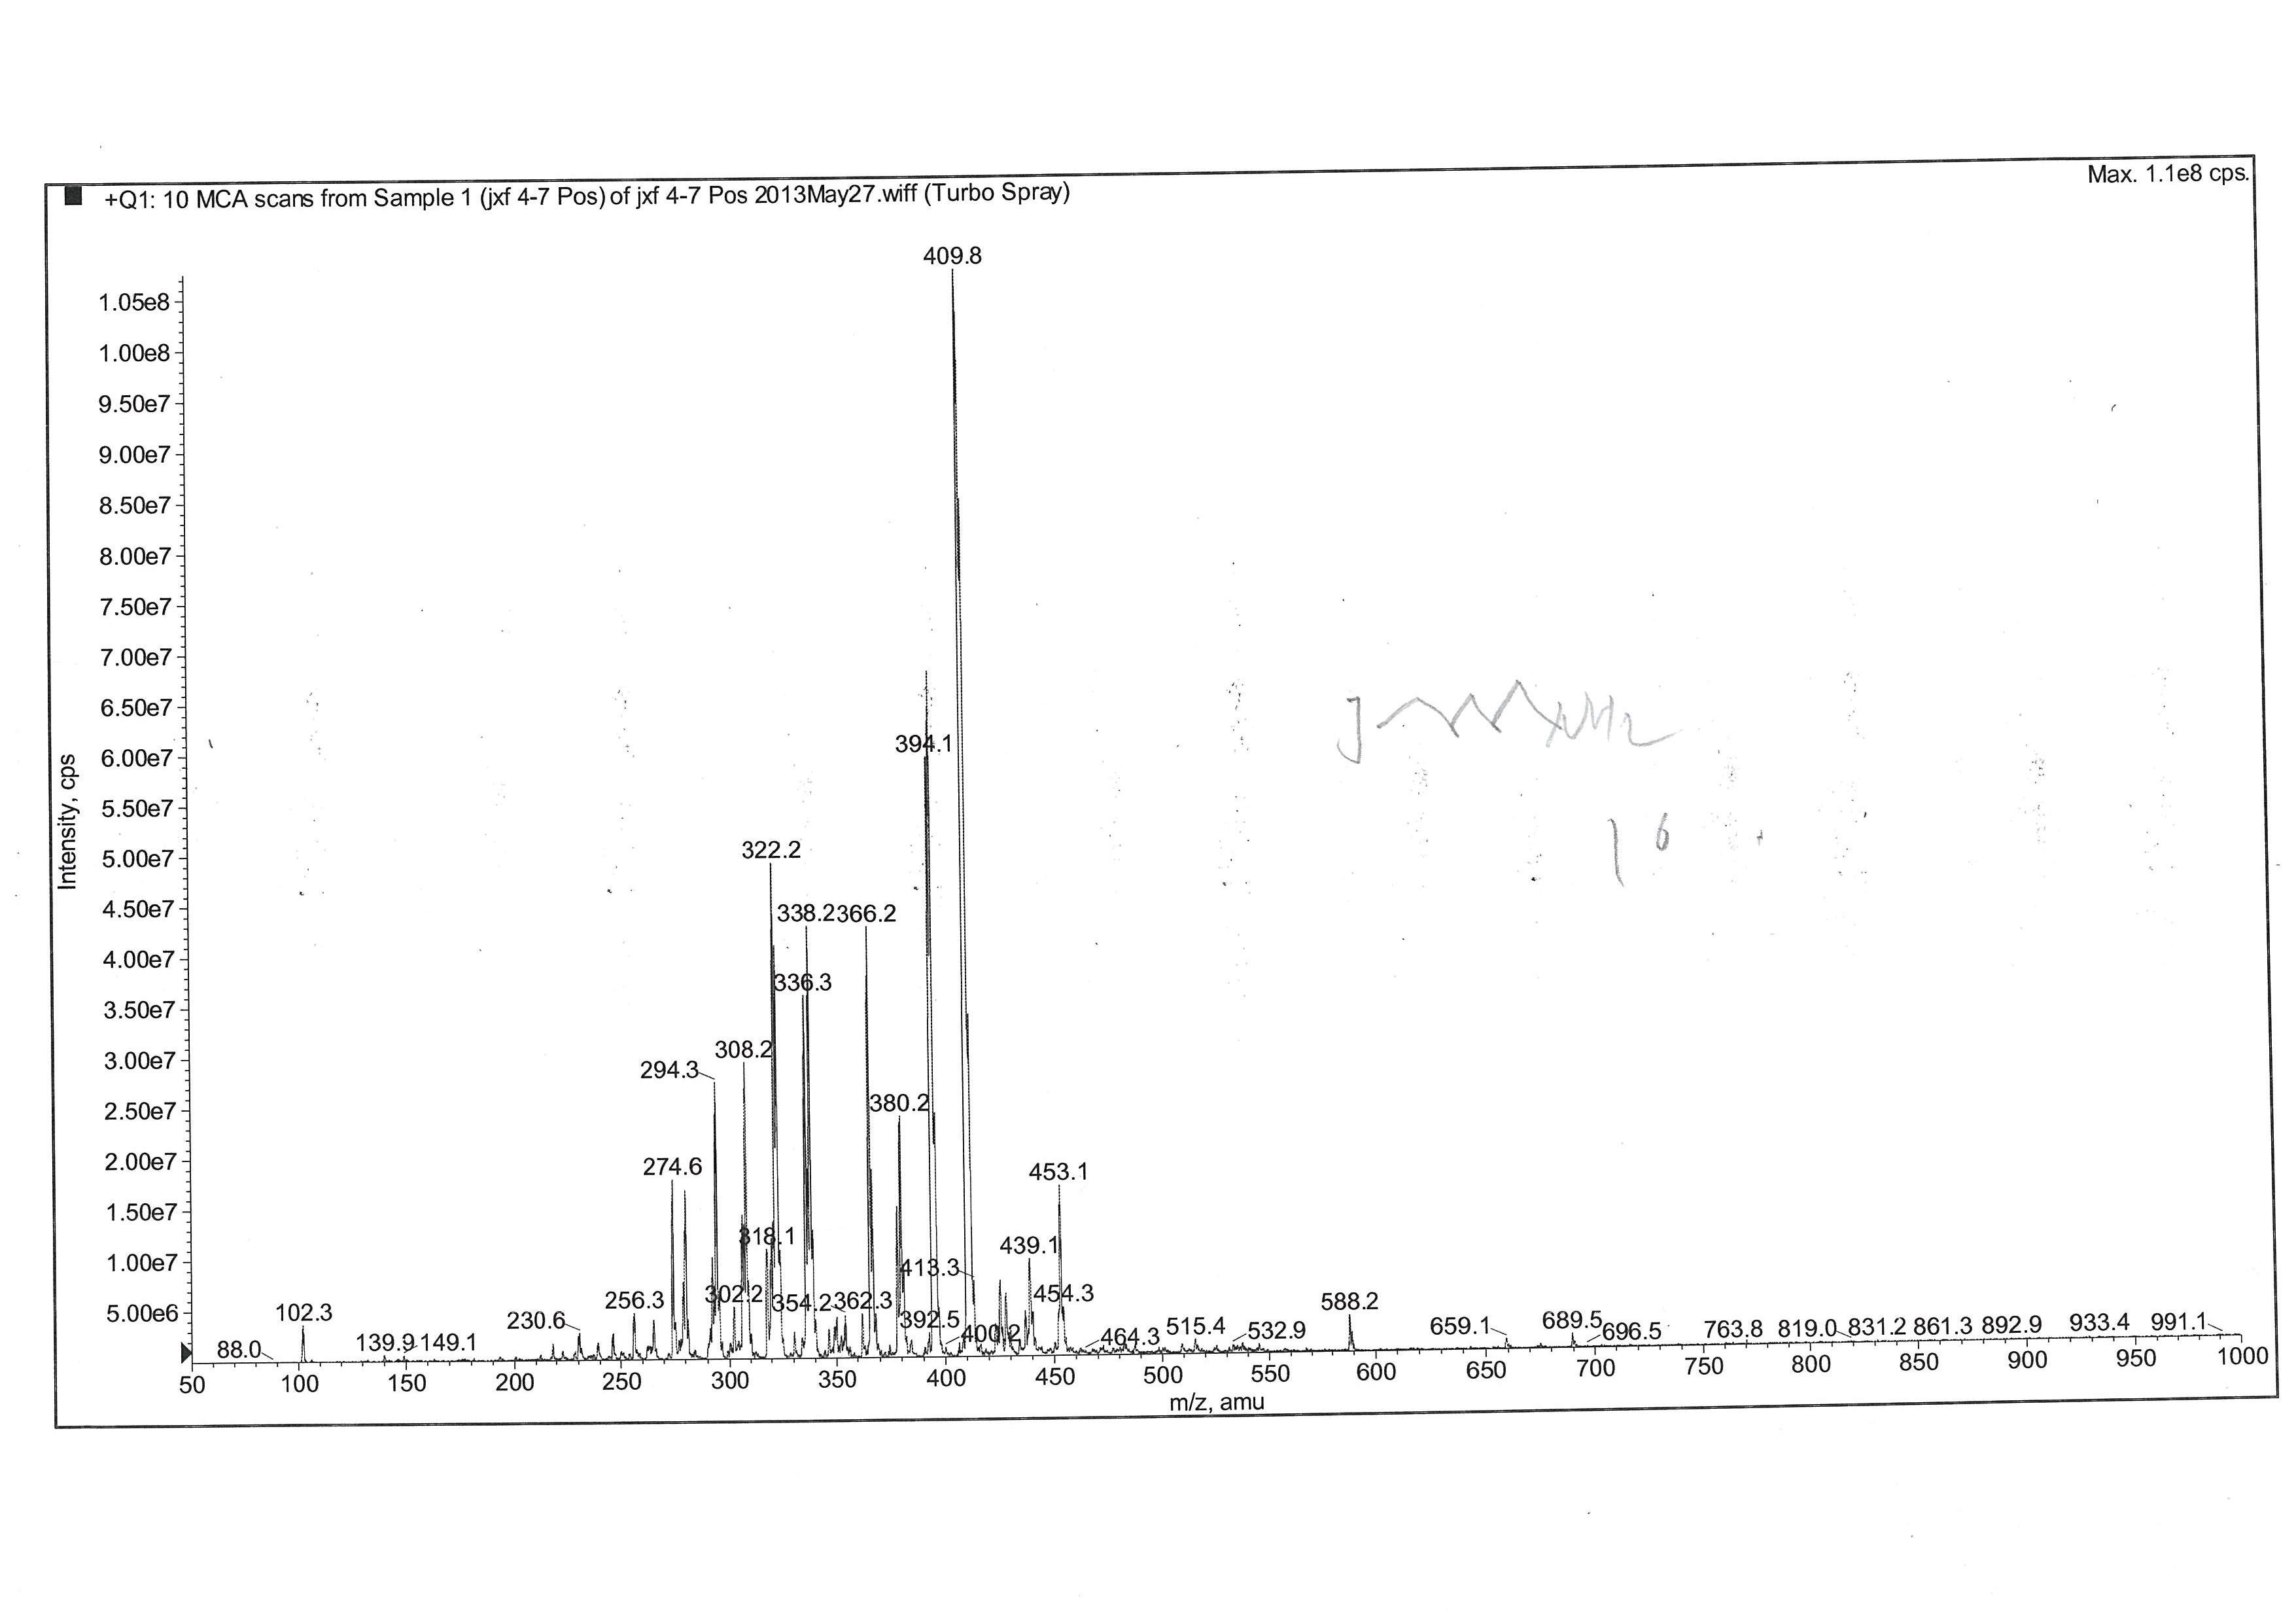

Supplement: f1 [file 3261520.f1.zip › 3261520.f1/A spectrogram of compound 3g/mass spectrogram of compound 3g.jpg]
